# Supplementary material for: Exploring Relevant mRNAs and miRNAs in Injured Urethral Tissues of Rats with High-Throughput Sequencing
Source: Genes (Basel). 2022 May 5;13(5):824. doi: 10.3390/genes13050824 (PMC9141346; doi:10.3390/genes13050824)
Supplement: Supplementary file 1 [file genes-13-00824-s001.zip › Supplementary Table.xlsx]

## Sheet: S1
Table S1. The RNA sequencing profiles of rat urethral tissues generated in this study.
sample_name	tissue	No. of reads
normal_2A	normal urethra	40381522
normal_3A	normal urethra	40497796
injured_3A	injured urethra	40370055
injured_4A	injured urethra	40592032

## Sheet: S2
Table S2. The normalized expression levels of genes (FPKM) in rat urethral tissues. Only genes with average abundances of at least 1 FPKM in one of the tissues are listed.
tracking_id	gene	strand	locus	start	end	classcode	normal_2A	normal_3A	injured_3A	injured_4A
MSTRG.1.1	MSTRG.1	.	chr1	1194330	1194581	u	3.82753	13.5747	4.66453	1.26294
MSTRG.10.1	MSTRG.10	.	chr1	1862163	1862832	u	2.57209	1.95038	0.315084	0
MSTRG.1000.2	P4ha3	+	chr1	154658571	154663707	n	1.10989	1.41412	1.05977	2.73618
MSTRG.10000.1	MSTRG.10000	.	chr3	164974982	164980882	u	1.40303	0.651646	1.0815	0.976091
MSTRG.10001.1	MSTRG.10001	+	chr3	164707890	164746627	u	2.21551	1.08449	1.49264	1.36801
MSTRG.10003.1	Fam217b	+	chr3	165505366	165515267	j	1.43475	0.703149	0.67414	2.87695
MSTRG.10004.1	MSTRG.10004	-	chr3	165512299	165515272	x	1.637	1.33397	2.19117	0.527591
MSTRG.10005.1	MSTRG.10005	-	chr3	167018105	167082381	u	6.43835	5.28506	7.10847	6.0891
MSTRG.10005.2	MSTRG.10005	-	chr3	167018105	167082381	u	3.88315	3.49089	2.04495	2.75549
MSTRG.10007.1	MSTRG.10007	+	chr3	167125661	167136406	u	2.48128	3.68571	4.20027	6.26446
MSTRG.10007.2	MSTRG.10007	+	chr3	167125661	167136406	u	4.77042	5.56976	5.87255	1.54426
MSTRG.10007.4	MSTRG.10007	+	chr3	167125694	167136406	u	4.56939	1.90413	2.32999	2.60776
MSTRG.10008.1	Ss18l1	+	chr3	167143996	167181356	k	2.07967	2.26954	2.18056	1.74117
MSTRG.10008.4	Mtg2	+	chr3	167170784	167181356	j	2.07213	1.68656	1.58758	2.18309
MSTRG.10009.2	Osbpl2	+	chr3	167210881	167256219	j	3.30837	1.20338	2.87354	2.30871
MSTRG.1001.1	MSTRG.1001	-	chr1	154635736	154640395	x	2.37003	0.761817	0	0.786158
MSTRG.10010.1	Rps21	+	chr3	167346393	167347459	m	18.7162	20.7291	21.9259	25.8005
MSTRG.10011.1	MSTRG.10011	-	chr3	167347515	167362285	u	5.31757	6.9088	6.74341	6.77719
MSTRG.10011.2	MSTRG.10011	-	chr3	167347578	167362285	u	2.78903	1.85548	1.17647	1.49545
MSTRG.10012.1	MSTRG.10012	-	chr3	167364054	167378933	u	4.03033	1.92987	1.57902	1.37265
MSTRG.10015.1	MSTRG.10015	-	chr3	167480914	167483962	u	3.90928	5.07717	5.08225	2.2614
MSTRG.10017.1	MSTRG.10017	.	chr3	167497071	167497330	u	63.302	67.5266	71.0596	1.08248
MSTRG.10018.1	Mrgbp	+	chr3	167697115	167700592	m	11.3901	11.6117	10.8263	14.0235
MSTRG.10018.2	Mrgbp	+	chr3	167697185	167700592	j	1.92612	1.64467	1.56442	0.503636
MSTRG.10019.1	Ogfr	+	chr3	167703173	167709459	j	1.42101	2.56518	1.18604	1.03983
MSTRG.10019.3	Ogfr	+	chr3	167703173	167709459	j	1.94356	2.56636	1.96458	2.7719
MSTRG.10019.4	Ogfr	+	chr3	167703173	167709459	j	9.44987e-19	1.60514e-47	1.16518	1.2577
MSTRG.10019.5	Ogfr	+	chr3	167703173	167709459	j	2.87153	0.00209132	1.05998	0.222221
MSTRG.10022.1	MSTRG.10022	-	chr3	167772547	167819725	u	5.08919	5.47298	5.60333	6.15678
MSTRG.10023.1	Slc17a9	+	chr3	167839385	167857431	j	3.58576	3.95778	2.92527	5.95446
MSTRG.10025.1	Nkain4	-	chr3	168053296	168073911	j	1.39623	1.74339	2.86352	1.44958
MSTRG.10026.1	Arfgap1	+	chr3	168084479	168099940	j	2.2095	1.94067	2.26551	1.65372
MSTRG.10026.2	Arfgap1	+	chr3	168084618	168099940	m	4.06186	4.14055	2.82027	6.44445
MSTRG.10027.1	Eef1a2	-	chr3	168265893	168277301	j	4.60519	7.28543	8.54592e-05	0.000126612
MSTRG.10027.3	Eef1a2	-	chr3	168265944	168277301	j	0.0861684	17.7388	0.801581	5.83557e-40
MSTRG.10027.4	Eef1a2	-	chr3	168265944	168273966	j	1.33864	1.06834	0.196263	1.1239e-33
MSTRG.10027.5	Eef1a2	-	chr3	168265944	168274371	j	4.57309	2.44393	5.15234	2.60896e-39
MSTRG.10027.6	Eef1a2	-	chr3	168265960	168274371	j	37.5639	62.92	80.4	1.54846e-22
MSTRG.10027.7	Eef1a2	-	chr3	168265960	168300142	j	2.13848	9.07495e-07	37.7948	2.44623e-12
MSTRG.10028.1	Ppdpf	+	chr3	168299763	168301039	j	83.6626	85.7844	82.6832	79.2676
MSTRG.10028.2	Ppdpf	+	chr3	168299763	168301039	k	5.766	3.744	5.36382	6.17384
MSTRG.10029.2	Helz2	-	chr3	168338973	168353159	m	1.20932	1.2643	1.51669	0.760586
MSTRG.10030.1	Gmeb2	-	chr3	168362672	168400468	j	5.02019	4.77696	4.83376	4.66677
MSTRG.10031.2	Tpd52l2	+	chr3	168598478	168618196	j	11.2529	10.692	14.0187	13.9923
MSTRG.10031.3	Tpd52l2	+	chr3	168598483	168618196	j	1.06563	1.48285	1.35621	0.942183
MSTRG.10032.1	MSTRG.10032	-	chr3	168599584	168621769	x	1.70637	1.49017	1.15124	1.34808
MSTRG.10033.1	Dnajc5	+	chr3	168621962	168656571	j	2.41858	4.6313	1.75519	3.73308
MSTRG.10033.2	Dnajc5	+	chr3	168621963	168656571	j	15.929	14.7741	15.9897	14.9213
MSTRG.10033.3	Dnajc5	+	chr3	168621963	168656571	j	0.00549996	0.00119555	2.26953	0.00414711
MSTRG.10033.5	Dnajc5	+	chr3	168621967	168656571	j	3.12122	2.61936	1.54323	3.22029
MSTRG.10034.1	Rtel1	+	chr3	168430428	168467985	j	4.92882	5.14531	4.02574	6.49231
MSTRG.10034.3	Rtel1	+	chr3	168430428	168467985	n	1.26823	2.60445	1.71209	1.94604
MSTRG.10034.4	Rtel1	+	chr3	168430452	168467985	j	1.18206	3.07014	3.85019	2.2266
MSTRG.10035.1	Arfrp1	-	chr3	168465367	168473960	j	3.31195	2.84849	2.73889	2.0871
MSTRG.10035.3	Arfrp1	-	chr3	168468057	168473960	j	16.8865	15.4842	16.6422	17.505
MSTRG.10036.1	Zgpat	+	chr3	168473906	168493660	j	2.17704	3.51297	2.21338	2.14271
MSTRG.10036.2	Zgpat	+	chr3	168474084	168493660	k	3.26424	2.29508	3.16313	2.85298
MSTRG.10037.1	MSTRG.10037	+	chr3	168493723	168499571	u	5.90289	6.386	6.10889	5.10448
MSTRG.10037.2	MSTRG.10037	+	chr3	168493723	168499571	u	1.45108	1.05271	1.23529	1.25632
MSTRG.10038.1	Zbtb46	-	chr3	168499583	168567786	k	2.33694	3.2289	2.77343	2.91935
MSTRG.10039.1	Samd10	-	chr3	168700280	168705053	j	4.45241	3.21533	0.384907	1.86042
MSTRG.10039.2	Samd10	-	chr3	168700372	168705053	j	0.000103545	0.00014486	2.10135	0.917962
MSTRG.10040.2	Uckl1	-	chr3	168674874	168687423	m	8.33881	10.0705	6.91483	7.54599
MSTRG.10040.3	Uckl1	-	chr3	168674875	168687423	j	3.21556	2.63108	5.62178	0.17787
MSTRG.10041.1	Zfp512b	-	chr3	168687521	168698050	m	1.49786	6.17199	2.43639	3.13814
MSTRG.10041.3	Zfp512b	-	chr3	168687521	168698050	j	1.20839	4.32828	0.00069241	0.386427
MSTRG.10041.5	Zfp512b	-	chr3	168687571	168698050	n	5.07574	1.57157	1.53478	5.20338
MSTRG.10044.1	MSTRG.10044	+	chr3	168787417	168788726	u	2.04871	3.27527	3.57369	3.24666
MSTRG.10045.1	Tcea2	+	chr3	168796296	168804123	j	6.34529	5.88312	5.75849	8.85871
MSTRG.10046.1	Rgs19	-	chr3	168804939	168810185	j	5.01814	5.99026	8.35741	15.3607
MSTRG.10046.2	Rgs19	-	chr3	168804939	168810185	j	5.62206	6.01697	4.04133	11.5679
MSTRG.10046.4	Rgs19	-	chr3	168804955	168810185	j	2.92045	1.91645	2.04689	4.93873
MSTRG.10048.1	MSTRG.10048	.	chr4	170692	171929	u	0.938281	1.2096	0.830797	2.08272
MSTRG.10049.1	Pcmtd2	+	chr3	168960264	168979502	j	2.41443	3.32939	2.06567	2.18486
MSTRG.10049.2	Pcmtd2	+	chr3	168960298	168979502	j	0.959555	3.30255	2.39833	1.77517
MSTRG.1005.1	Ucp2	+	chr1	154838777	154845612	j	1.13872	2.25618	1.35001	2.23293
MSTRG.10050.1	MSTRG.10050	.	chr4	458271	458529	u	4.44852	11.8275	1.01944	3.30833
MSTRG.10051.1	MSTRG.10051	.	chr4	497489	497824	u	3.14727	9.00476	3.29759	1.17851
MSTRG.10052.1	MSTRG.10052	.	chr4	610039	617740	u	1.43772	1.61926	2.09585	2.38285
MSTRG.10053.1	MSTRG.10053	.	chr4	2489527	2489782	u	102.493	107.089	17.2576	18.6776
MSTRG.10054.1	MSTRG.10054	.	chr4	2490392	2490661	u	7.30987	0	0	0
MSTRG.10055.1	MSTRG.10055	-	chr4	4582125	4610649	u	1.08981	2.16122	1.18074	0.656598
MSTRG.10056.1	Dnajb6	-	chr4	5491606	5556644	m	0.917236	1.39256	1.44668	0.879912
MSTRG.10056.4	Dnajb6	-	chr4	5518639	5556644	j	13.0211	13.4137	14.7456	12.6439
MSTRG.10057.1	MSTRG.10057	-	chr4	5648743	5749927	u	10.3662	9.95511	10.8186	11.4769
MSTRG.10058.1	MSTRG.10058	-	chr4	5884710	5909762	u	3.87537	3.8447	3.39496	3.37072
MSTRG.10060.1	Rnf32	-	chr4	6147353	6208812	j	1.27809	1.34309	1.54246	1.19085
MSTRG.10061.1	MSTRG.10061	-	chr4	6941603	6953990	u	7.27219	6.20725	3.00422	3.80434
MSTRG.10063.1	Rbm33	-	chr4	6980807	7087631	j	6.37035	6.82871	7.91342	4.87643
MSTRG.10063.3	Rbm33	-	chr4	6980807	7087631	j	4.79959	6.95625	5.15078	5.686
MSTRG.10064.1	Insig1	-	chr4	7315495	7323925	j	22.1499	11.2651	11.5966	18.523
MSTRG.10065.1	Paxip1	+	chr4	7525092	7576663	k	1.36201	2.49347	3.08968	3.02544
MSTRG.10065.2	Paxip1	+	chr4	7525115	7576663	j	1.89518	1.39012	1.48553	1.69455
MSTRG.10066.1	MSTRG.10066	.	chr4	8893097	8893330	u	3.82786	7.41743	5.21178	0
MSTRG.1007.1	Fam168a	+	chr1	155057352	155204328	j	9.4964	10.5571	12.5392	13.6173
MSTRG.10070.1	MSTRG.10070	.	chr4	9591473	9593175	p	1.90736	1.75024	2.07518	1.74861
MSTRG.10073.3	Galnt11	-	chr4	9837644	9871140	j	8.99541e-05	2.30049	5.58753e-05	0.000135123
MSTRG.10075.1	MSTRG.10075	+	chr4	9620672	9834782	u	2.87565	3.99551	3.55106	3.13556
MSTRG.10075.2	MSTRG.10075	+	chr4	9620675	9834782	u	1.9708	1.11658	2.833	1.19817
MSTRG.10075.3	MSTRG.10075	+	chr4	9620694	9834782	u	1.45225	1.20461	0.249391	0.950948
MSTRG.10076.1	MSTRG.10076	-	chr4	10007663	10010907	u	3.89638	4.15833	3.75056	4.50169
MSTRG.10077.1	Prkag2	+	chr4	10011431	10252142	j	3.01984	4.54401	3.69662	2.67107
MSTRG.10077.2	Prkag2	+	chr4	10011431	10252142	j	4.59299	3.16813	5.1645	6.64584
MSTRG.10078.1	Rheb	+	chr4	10279365	10320319	j	18.2098	12.2589	18.7222	16.7105
MSTRG.1008.1	Mrpl48	-	chr1	154896663	154956762	j	1.30875	1.26113	1.34804	1.85902
MSTRG.1008.3	Mrpl48	-	chr1	154897057	154958783	j	2.76893	2.75767	2.56227	2.28861
MSTRG.1008.4	Mrpl48	-	chr1	154923557	154939261	j	11.1784	9.51463	8.82725	12.0401
MSTRG.10080.1	Nub1	-	chr4	10441482	10473689	j	4.70612	4.84429	5.68531	3.0145
MSTRG.10081.1	Smarcd3	+	chr4	10548693	10580731	j	4.05729	5.13291	6.91175	8.80644
MSTRG.10081.3	Smarcd3	+	chr4	10569744	10580731	j	6.79431	5.27851	6.48359	4.09012
MSTRG.10082.2	Mir671	-	chr4	10580747	10585923	k	0.464626	0.872605	2.03599	1.89699
MSTRG.10082.5	Chpf2	-	chr4	10581760	10585923	j	1.61459	0.984727	1.81163	2.2964
MSTRG.10083.1	Abcf2	+	chr4	10594886	10607604	j	10.2357	15.0381	7.69838	1.65674
MSTRG.10083.2	Abcf2	+	chr4	10594896	10607604	j	17.583	9.89666	22.5533	24.3064
MSTRG.10084.1	Tmub1	+	chr4	10729231	10732060	m	1.23029	1.13498	1.22073	1.36641
MSTRG.10085.10	Agap3	-	chr4	10674752	10725118	j	1.76746	1.18431	1.23443	0.835768
MSTRG.10085.2	Agap3	-	chr4	10674668	10725118	j	12.472	14.2783	12.5034	21.4069
MSTRG.10085.3	Agap3	-	chr4	10674668	10725118	n	2.38673	3.0112	2.7029	2.59906
MSTRG.10085.7	Agap3	-	chr4	10674752	10707969	n	1.37736	1.32172	0.966326	0.664304
MSTRG.10085.8	Agap3	-	chr4	10674752	10725118	n	2.09062	0.0834085	2.59637	1.91114
MSTRG.10085.9	Agap3	-	chr4	10674752	10725118	n	1.8974	2.66946	1.6733	0.785761
MSTRG.10086.2	Cdk5	+	chr4	10754713	10759169	m	6.52017	6.74249	6.75798	6.43199
MSTRG.10087.1	Fastk	+	chr4	10732290	10736332	n	15.4766	16.7442	12.3644	22.7086
MSTRG.10087.4	Fastk	+	chr4	10732303	10736332	j	5.86553	2.70754	4.23027	9.15439
MSTRG.10087.5	Fastk	+	chr4	10732303	10736332	m	1.74361	5.70326	2.41631	0.878567
MSTRG.10089.1	Abcb8	-	chr4	10766234	10783575	m	3.83921	4.12632	3.6033	4.26197
MSTRG.1009.1	Rab6a	+	chr1	154957731	155007904	j	9.61296	11.1291	11.5892	11.9464
MSTRG.1009.3	MSTRG.1009	+	chr1	155004810	155053407	x	1.12933	1.72974	1.58907	1.52255
MSTRG.10091.1	MSTRG.10091	+	chr4	10812704	10813543	i	1.74462	2.2145	2.48293	2.81697
MSTRG.10092.2	Kcnh2	+	chr4	10848979	10859009	j	5.49681	4.33103	7.58482	4.34409
MSTRG.10094.2	Nupl2	-	chr4	10986153	11001584	n	1.285	1.58305	1.44892	1.41309
MSTRG.10095.2	Klhl7	-	chr4	11054069	11055509	j	3.12625	0.932602	0.888713	0.620125
MSTRG.10097.1	Fam126a	+	chr4	11132316	11196101	j	1.63177	1.81187	1.32287	3.80385
MSTRG.10098.1	MSTRG.10098	.	chr4	11295777	11296082	u	6.54198	2.61502	0	3.2632
MSTRG.101.1	MSTRG.101	+	chr1	26856015	27016928	u	1.05456	1.51091	2.05855	1.68504
MSTRG.101.2	MSTRG.101	+	chr1	27006091	27016928	u	12.9105	13.3545	14.0924	11.34
MSTRG.1010.1	Plekhb1	-	chr1	154998804	155013069	j	45.7424	38.8376	37.8472	13.9932
MSTRG.10101.1	MSTRG.10101	-	chr4	11315445	11355743	u	4.3432	3.85317	3.69482	5.1262
MSTRG.10102.1	Pus7	+	chr4	11360209	11401174	j	0.426471	1.8366	1.17958	2.24989
MSTRG.10102.3	Pus7	+	chr4	11382920	11401174	j	2.26851	2.62318	2.75497	2.57483
MSTRG.10103.1	MSTRG.10103	+	chr4	11438045	11449864	u	3.21866	2.25765	3.47831	4.28831
MSTRG.10103.2	MSTRG.10103	+	chr4	11438739	11449864	u	1.38529	1.93465	1.8369	1.49165
MSTRG.10105.1	Srpk2	+	chr4	11475834	11657802	j	5.76979	5.15858	4.92524	4.1725
MSTRG.10105.2	Srpk2	+	chr4	11475834	11657802	j	3.09637	2.9585	3.02258	3.20366
MSTRG.10105.3	Srpk2	+	chr4	11494309	11657802	j	1.77398	0.9871	0.0935305	0.0917609
MSTRG.10106.2	Kmt2e	-	chr4	11658236	11739573	j	4.86984	7.39823	5.33854	5.06971
MSTRG.10106.6	Kmt2e	-	chr4	11658246	11667557	j	12.5043	10.8768	13.4332	11.5784
MSTRG.10108.1	MSTRG.10108	.	chr4	11824907	11825110	u	24.0082	4.68282	8.66123	0
MSTRG.10109.1	MSTRG.10109	+	chr4	12337548	12354823	u	1.26509	2.25799	2.61236	0.859119
MSTRG.1011.1	Relt	-	chr1	155206976	155224604	j	1.65425	0.899772	1.84338	0.490058
MSTRG.10110.2	Orc5	+	chr4	12575207	12612611	n	2.08839	2.59833	2.25225	2.16344
MSTRG.10111.1	Reln	+	chr4	12736193	13162880	j	3.45485	3.84678	4.35354	3.49305
MSTRG.10113.1	Dnajc2	+	chr4	13270283	13297431	k	0.698655	1.81475	2.04819	2.67486
MSTRG.10113.2	Dnajc2	+	chr4	13271570	13297431	j	1.45188	0.922096	2.86985	0.512925
MSTRG.10116.1	MSTRG.10116	+	chr4	13400558	13401354	i	0.432821	2.0348	1.31424	0.436823
MSTRG.10119.1	Fam185a	-	chr4	13607648	13662967	j	2.36014	3.1793	4.23867	2.93283
MSTRG.10119.2	Fam185a	-	chr4	13607718	13662967	j	5.17218	4.32534	4.64931	4.76804
MSTRG.1012.2	P2ry6	-	chr1	155295814	155320081	j	2.27189e-05	2.14595	1.4626	2.87079
MSTRG.1012.3	P2ry6	-	chr1	155295906	155300285	j	2.5169	0.498847	1.76066	2.19096
MSTRG.10122.1	Gsap	-	chr4	13812416	13907882	j	1.8628	2.39174	2.22533	2.57353
MSTRG.10123.1	Ptpn12	+	chr4	14021015	14092927	j	9.39828	15.583	13.2805	11.7513
MSTRG.10125.2	Rsbn1l	+	chr4	14139042	14203905	j	2.15426	1.73737	2.32154	2.2434
MSTRG.10127.1	Phtf2	+	chr4	14215213	14330548	j	4.85549	5.5984	5.12643	6.09107
MSTRG.10127.2	Phtf2	+	chr4	14215218	14330548	j	2.15673	1.76616	2.03109	1.583
MSTRG.10128.1	Magi2	-	chr4	14386399	14538022	j	2.01728	1.75648	1.79495	1.73289
MSTRG.10129.1	Gnai1	+	chr4	16813944	16897144	m	20.3415	16.3124	19.6969	21.1493
MSTRG.1013.1	Mir3102	-	chr1	155230658	155290164	o	6.48863	7.75861	7.89178	7.42056
MSTRG.1013.2	Mir3102	-	chr1	155230668	155256536	o	10.3382	9.15994	9.57655	7.57955
MSTRG.10130.1	RGD1565355	+	chr4	17354525	17410083	k	1.2717	0.938429	3.78393	0.636709
MSTRG.10132.1	Sema3c	-	chr4	17583104	17746803	j	3.02788	2.58916	3.51566	7.43141
MSTRG.10132.2	Sema3c	-	chr4	17583212	17746803	k	2.71823	4.04138	3.39042	16.6133
MSTRG.10133.1	Hgf	-	chr4	18673741	18745672	j	0.198695	0.000155956	1.31891	1.37704
MSTRG.10133.2	Hgf	-	chr4	18673786	18745314	j	0.500228	1.83343	5.41375e-05	0.121958
MSTRG.10134.1	MSTRG.10134	.	chr4	20297544	20299277	p	1.03735	0.976	1.94334	1.61812
MSTRG.10136.1	Cacna2d1	-	chr4	18947505	18996702	j	8.79307	9.73091	8.6997	4.77346
MSTRG.10136.2	Cacna2d1	-	chr4	18947943	19374962	j	3.70812	4.16016	2.06732	0.43237
MSTRG.10137.1	MSTRG.10137	.	chr4	19046765	19047590	i	38.6892	29.4937	0.286157	0.121664
MSTRG.10138.1	MSTRG.10138	.	chr4	19049283	19049653	i	121.819	95.1498	24.4492	19.7559
MSTRG.10140.1	Sema3d	-	chr4	22315047	22505982	j	6.25588	6.90471	8.46291	15.1833
MSTRG.10142.1	Dmtf1	+	chr4	24910018	24951003	j	1.25324	1.52625	0.974245	1.59859
MSTRG.10142.2	Dmtf1	+	chr4	24910487	24951003	j	1.8096	1.95492	1.74458	1.50844
MSTRG.10143.1	Tmem243	-	chr4	24950768	24968642	j	1.37384	1.71329	0.785455	1.46184
MSTRG.10143.3	Tmem243	-	chr4	24951325	24968642	m	2.41613	0.858628	2.31478	1.45427
MSTRG.10144.1	Crot	+	chr4	25090343	25133109	j	1.74909	1.81649	1.66041	5.06494e-05
MSTRG.10146.1	MSTRG.10146	+	chr4	25888102	25970865	u	2.49244	2.76089	3.61518	3.8782
MSTRG.10147.1	Sri	-	chr4	25972647	25987774	j	29.2396	28.9341	32.2492	26.111
MSTRG.1015.1	Fchsd2	+	chr1	155457743	155685731	j	1.47076	1.79939	1.98942	1.68403
MSTRG.10150.2	Slc25a40	-	chr4	25631590	25676422	j	3.93861	4.8188	3.64924	4.88641
MSTRG.10154.2	Steap2	+	chr4	28348078	28368176	j	6.86882e-05	1.11097e-05	3.14047	1.96766
MSTRG.10155.1	MSTRG.10155	+	chr4	28379615	28395373	u	3.14179	1.26601	1.27707	1.17729
MSTRG.10157.1	Cldn12	+	chr4	28522679	28533647	k	0.973109	1.82624	2.49251	1.65324
MSTRG.10159.1	Cdk14	+	chr4	28666170	29258860	j	3.02758	4.2505	5.0607	8.59976
MSTRG.1016.1	MSTRG.1016	-	chr1	155493694	155546719	i	2.00318	0.830454	1.2664	1.86258
MSTRG.10160.1	MSTRG.10160	.	chr4	29470026	29470360	u	1.19177	0	0.739891	1.98337
MSTRG.10161.1	MSTRG.10161	-	chr4	29886622	29895948	u	1.87751	1.73259	2.19803	2.35224
MSTRG.10162.1	MSTRG.10162	-	chr4	29912612	29922454	u	2.24856	2.82612	2.88021	2.95781
MSTRG.10163.1	Mterf1	+	chr4	30226367	30233402	j	0.879918	2.25934	1.66205	2.56808
MSTRG.10163.2	Mterf1	+	chr4	30226382	30233402	j	0.32742	2.66901	2.29789	2.4429e-05
MSTRG.10163.3	Mterf1	+	chr4	30226385	30233402	j	7.35379	2.48256	4.32055	4.07598
MSTRG.10165.3	Akap9	-	chr4	30056742	30193098	j	4.27424	2.77069	2.77533	3.58848
MSTRG.10167.1	Ankib1	+	chr4	30330686	30457781	j	1.66142	1.00925	1.43468	2.09885
MSTRG.10168.1	MSTRG.10168	+	chr4	30507459	30519957	x	15.9931	15.3988	16.4091	20.1773
MSTRG.10172.1	Cdk6	-	chr4	30637627	30829911	k	5.55278	6.24227	4.06768	4.42815
MSTRG.10173.1	MSTRG.10173	.	chr4	31081591	31082189	u	3.71342	4.05761	5.22768	7.88801
MSTRG.10174.1	MSTRG.10174	-	chr4	31164651	31184396	u	2.24615	2.18785	2.76894	2.71826
MSTRG.10175.1	MSTRG.10175	-	chr4	31266525	31269407	u	3.16021	5.04543	5.7534	3.07387
MSTRG.10176.1	MSTRG.10176	-	chr4	31269462	31290636	u	1.69205	0.000172279	2.0791	0.462132
MSTRG.10176.2	MSTRG.10176	-	chr4	31269476	31279176	u	0.137081	3.04048	0.961431	1.08452
MSTRG.10177.1	MSTRG.10177	-	chr4	31320334	31342288	u	1.40959	2.32563	2.08926	0.874899
MSTRG.10177.2	MSTRG.10177	-	chr4	31320358	31342288	u	0.631596	0.311616	1.06237	1.44056
MSTRG.10178.1	MSTRG.10178	-	chr4	31362068	31374245	u	1.66681	1.54712	2.53394	0.315852
MSTRG.10178.2	MSTRG.10178	-	chr4	31362072	31374245	u	5.99685	6.23313	6.75709	8.18354
MSTRG.1018.1	Atg16l2	-	chr1	155690895	155703730	m	1.40159	1.39306	0.406153	0.75296
MSTRG.1018.5	Atg16l2	-	chr1	155691130	155703730	m	0.74517	1.39703	0.708963	1.07312
MSTRG.10181.1	Tfpi2	-	chr4	31982178	31986600	j	0.00020707	1.22748	2.40498	2.1254
MSTRG.10184.1	MSTRG.10184	+	chr4	32658946	32739224	u	9.69553	6.1679	5.98017	4.94948
MSTRG.10185.1	Col1a2	+	chr4	32563422	32600670	j	333.726	484.565	735.382	0
MSTRG.10186.2	Sgce	-	chr4	32771506	32842203	j	0.500635	1.16285	7.38989	5.11547
MSTRG.10186.3	Sgce	-	chr4	32771506	32842203	j	2.38715	1.14465	0.271511	0.661614
MSTRG.10186.5	Sgce	-	chr4	32771507	32842203	j	1.23772	2.36812	0.0290174	0.0055336
MSTRG.10187.2	Ppp1r9a	+	chr4	33024951	33292360	j	1.16474	0.988939	1.11063	0.255732
MSTRG.1019.1	Stard10	+	chr1	155722233	155747963	j	10.1205	4.90352	7.18414	6.60915
MSTRG.10191.1	Dync1i1	+	chr4	33852751	34166150	j	1.42487	0.689856	1.23745	1.86494
MSTRG.10192.1	MSTRG.10192	-	chr4	34179196	34361975	u	2.57794	1.15772	0.23074	0.591662
MSTRG.10192.2	MSTRG.10192	-	chr4	34179224	34361975	u	0.988095	1.315	1.90532	1.48191
MSTRG.10195.1	Sdhaf3	+	chr4	35100522	35160727	j	9.09991	9.81959	10.2808	5.50347
MSTRG.10196.1	MSTRG.10196	.	chr4	35271799	35272046	u	2.77322	0	1.2652	0
MSTRG.10197.1	Asns	-	chr4	35785409	35803456	j	7.55559	3.33547	3.31078	4.58864
MSTRG.10198.1	C1galt1	+	chr4	35930862	35966101	j	2.71027	2.32952	0.836642	2.96946
MSTRG.10199.1	MSTRG.10199	-	chr4	36067494	36223100	u	0.558218	1.86024	0.158506	0.840794
MSTRG.10199.2	MSTRG.10199	-	chr4	36068259	36223100	u	8.63347	6.20178	6.10328	6.82091
MSTRG.102.1	Hint3	+	chr1	27035936	27046568	m	1.23145	1.98966	0.926194	1.7902
MSTRG.1020.1	MSTRG.1020	+	chr1	155748620	155814182	u	2.16052	3.34499	3.4163	0.000402522
MSTRG.1020.2	MSTRG.1020	+	chr1	155748650	155814182	u	3.13934	2.91408	1.84833	5.40848
MSTRG.1020.3	MSTRG.1020	+	chr1	155779886	155814182	u	4.81859	3.69463	5.96734	5.55129
MSTRG.1020.4	MSTRG.1020	+	chr1	155795831	155814182	u	20.7856	21.586	19.3807	40.0378
MSTRG.10200.1	Mios	+	chr4	36263902	36290361	j	1.64486	1.01676	1.39455	1.33361
MSTRG.10202.2	Glcci1	+	chr4	36561733	36635614	j	0.447525	1.64108	0.977462	1.27083
MSTRG.10202.3	Glcci1	+	chr4	36562041	36635614	j	1.06972	0.584418	1.60086	2.5637
MSTRG.10204.2	Ica1	-	chr4	36656508	36804567	j	3.98269	2.93441	3.47904	3.01667
MSTRG.10204.3	Ica1	-	chr4	36656508	36804567	j	4.55428	3.39697	2.52777	2.30728
MSTRG.10205.1	MSTRG.10205	.	chr4	37758373	37759289	u	6.00265	7.98219	7.60116	8.18259
MSTRG.10207.1	Phf14	+	chr4	40009584	40195839	j	1.36694	2.51476	3.58378	2.657
MSTRG.10207.3	Phf14	+	chr4	40023510	40195839	j	8.5892	7.35685	7.28569	8.5272
MSTRG.10208.1	MSTRG.10208	.	chr4	41144091	41144321	u	22.72	0	0	0
MSTRG.1021.4	Pde2a	+	chr1	155854004	155915434	j	2.42893	2.61205	4.36166	1.61366
MSTRG.10210.1	MSTRG.10210	.	chr4	41829120	41829619	p	18.3932	20.7699	18.6716	23.7213
MSTRG.10211.1	Tmem106b	+	chr4	41327954	41349945	j	2.41673	3.26131	4.16571	3.88812
MSTRG.10213.1	Bmt2	-	chr4	41878656	41945334	j	4.53521	5.08346	4.731	4.59211
MSTRG.10220.2	Cav2	+	chr4	45613245	45624246	k	1.26737	2.19327	2.61486	3.50406
MSTRG.10221.2	Cav1	+	chr4	45641300	45673704	j	8.86011	7.638	9.47171	8.18535
MSTRG.10222.1	Met	+	chr4	45790684	45898139	k	4.99689	3.30454	3.22641	3.26324
MSTRG.10224.1	ST7	+	chr4	46041718	46289742	j	1.17719	1.77505	1.49639	1.83451
MSTRG.10225.1	MSTRG.10225	-	chr4	46330436	46374668	u	0.940601	1.4682	1.21572	4.69173
MSTRG.10225.2	MSTRG.10225	-	chr4	46334101	46373937	u	1.54271	1.513	1.23837	4.73043
MSTRG.10226.1	MSTRG.10226	+	chr4	46330480	46332025	u	1.087	1.00146	0.869811	0.689651
MSTRG.10227.1	MSTRG.10227	.	chr4	47006868	47007396	u	6.06642	8.55895	6.80101	6.35144
MSTRG.10228.1	MSTRG.10228	.	chr4	47008378	47008929	u	2.44615	1.09538	1.21101	1.28898
MSTRG.10230.1	MSTRG.10230	.	chr4	47270173	47270494	u	10.4389	15.6246	7.17478	7.24921
MSTRG.10232.1	Tspan12	-	chr4	50313771	50389623	j	5.66416	3.14956	4.16543	2.36733
MSTRG.10233.1	Ing3	+	chr4	50477826	50505226	j	1.45764	0.750798	0.89549	0.761518
MSTRG.10234.1	MSTRG.10234	+	chr4	50516727	50789579	u	11.9757	13.3147	20.6677	15.0473
MSTRG.10236.1	Ptprz1	+	chr4	51397154	51595220	j	4.69583	3.86487	1.98659	2.24322
MSTRG.10238.2	MSTRG.10238	-	chr4	51780470	52309639	y	0.33461	1.88777	0.167717	0.000256327
MSTRG.10238.3	MSTRG.10238	-	chr4	51780494	52309639	y	3.54317	1.05719	2.42597	2.30252
MSTRG.1024.2	Folr2	-	chr1	156200052	156205713	j	4.27084	6.47702	9.94702	17.5994
MSTRG.10241.1	Ndufa5	-	chr4	52994178	53005680	j	4.49311	2.79845	4.49515	2.21407
MSTRG.10242.1	MSTRG.10242	+	chr4	53005820	53037663	u	1.36631	3.12385	0.242661	3.43917
MSTRG.10243.1	MSTRG.10243	+	chr4	53037811	53050788	u	4.08837	8.16347	0.58237	4.91477
MSTRG.10245.2	Wasl	-	chr4	53083550	53093277	n	1.44853	1.49566	1.39337	1.47759
MSTRG.10246.1	MSTRG.10246	.	chr4	54391973	54392250	u	40.1194	18.5732	15.5412	18.3624
MSTRG.10247.1	Pot1	-	chr4	54205214	54263398	j	0.702426	1.99733	3.27333	2.06965
MSTRG.10247.3	Pot1	-	chr4	54205528	54263398	j	1.35101	0.670742	0.109238	2.08363e-05
MSTRG.10248.1	Zfp800	-	chr4	56825575	56849784	k	2.75875	2.88341	2.26006	2.25233
MSTRG.10250.1	MSTRG.10250	-	chr4	57030832	57036701	u	3.83214	3.92787	4.49324	5.42958
MSTRG.10252.1	MSTRG.10252	.	chr4	57092909	57094854	u	0.927012	1.53586	1.1009	0.922887
MSTRG.10257.2	Rbm28	-	chr4	57722953	57761596	j	5.80952	6.34403	5.76379	6.51501
MSTRG.10259.1	MSTRG.10259	+	chr4	57871102	57873999	u	9.14711	10.2601	10.0355	13.3423
MSTRG.1026.4	Inppl1	-	chr1	156183324	156197616	j	11.2962	14.309	17.078	17.0933
MSTRG.1026.6	Inppl1	-	chr1	156183756	156193966	j	0.784376	2.22893	0.992052	1.20817
MSTRG.10260.1	Impdh1	-	chr4	57801842	57817486	j	22.9995	24.6461	19.4575	33.9678
MSTRG.10260.3	Impdh1	-	chr4	57801892	57817486	j	0.391177	1.04384	1.96881	1.68235
MSTRG.10261.1	Calu	+	chr4	57949030	57977066	j	5.81822	9.6733	9.77944	9.01346
MSTRG.10261.2	Calu	+	chr4	57949043	57977066	j	13.0748	20.6036	23.607	43.8682
MSTRG.10262.1	MSTRG.10262	+	chr4	57997838	58027598	u	5.06635	5.58115	5.82894	5.80466
MSTRG.10264.1	Flnc	+	chr4	58034189	58061882	j	17.7505	18.907	12.8785	4.15491e-05
MSTRG.10265.1	MSTRG.10265	-	chr4	58082860	58098406	u	1.10763	1.63635	1.02048	1.09464
MSTRG.10266.1	Irf5	+	chr4	58128087	58141262	j	3.64148	4.4447	3.5973	6.4721
MSTRG.10269.1	Smo	+	chr4	58343518	58373790	j	7.8735	6.28679	8.57379	13.871
MSTRG.10269.2	Smo	+	chr4	58344101	58373790	j	1.58629	0.944561	1.19364	1.41566
MSTRG.1027.1	Anapc15	+	chr1	156262461	156266005	j	2.00685	1.70033	1.82871	2.46108
MSTRG.10271.1	Nrf1	+	chr4	58664077	58770563	j	1.45451	3.25475	1.63071	2.82357
MSTRG.10271.2	Nrf1	+	chr4	58664089	58770563	j	4.16127	2.90081	3.58198	3.20133
MSTRG.10272.1	Ube2h	-	chr4	58834675	58930543	j	0.654556	1.00418	1.34888	0.836168
MSTRG.10275.1	Klhdc10	+	chr4	59021329	59079069	j	1.54352	3.71269	1.3616	1.83884
MSTRG.10276.2	Tmem209	-	chr4	59102960	59128602	j	6.23198	5.61484	5.78756	5.94855
MSTRG.10279.1	Cep41	-	chr4	59271232	59310652	j	1.84051	2.16734	1.98859	2.7969
MSTRG.1028.2	Art5	-	chr1	156473380	156476640	j	0.466844	3.68732	1.2508	0
MSTRG.10282.1	MSTRG.10282	.	chr4	59693513	59695975	u	1.15662	1.53814	1.61217	1.3191
MSTRG.10283.1	Mkln1	+	chr4	59815988	60133561	j	2.65463	2.65942	2.61233	1.80305
MSTRG.10286.1	Chchd3	-	chr4	61360344	61616836	j	2.89164	3.74676	3.25921	2.62335
MSTRG.10286.2	Chchd3	-	chr4	61360344	61616836	j	1.91295	2.69372	3.45957	2.66482
MSTRG.10288.1	Slc35b4	-	chr4	62774123	62799003	k	3.14054	3.94653	4.05232	4.42327
MSTRG.1029.1	Art1	+	chr1	156478113	156487172	k	21.4762	46.758	44.8403	0.000283312
MSTRG.10291.2	Akr1b10	+	chr4	63040105	63060919	j	1.1303	1.28688	1.20149	1.28995
MSTRG.10292.1	Bpgm	+	chr4	63140026	63168581	j	8.8268	8.34161	7.05419	9.15062
MSTRG.10292.3	Bpgm	+	chr4	63150820	63168581	j	4.62569	0.175205	1.66096	0.36092
MSTRG.10293.1	Cald1	+	chr4	63265840	63446938	j	1.59533	5.06955	3.22888	6.56626
MSTRG.10293.2	Cald1	+	chr4	63265878	63446938	j	4.03247	1.71318	3.23791	0.530273
MSTRG.10293.3	Cald1	+	chr4	63265878	63446938	j	9.03963	1.30725	8.38369	2.3984
MSTRG.10293.4	Cald1	+	chr4	63266047	63446938	j	23.045	0.00132254	29.7795	4.44966
MSTRG.10293.5	Cald1	+	chr4	63266047	63446938	j	2.74913	14.9237	2.92634	24.3287
MSTRG.10293.6	Cald1	+	chr4	63266047	63446938	j	22.9048	38.2637	27.1855	20.7287
MSTRG.10293.7	Cald1	+	chr4	63266050	63446938	j	23.0055	22.8422	25.8353	14.9264
MSTRG.10294.1	MSTRG.10294	.	chr4	63595222	63598468	u	0	3.95965	3.66721	0
MSTRG.10295.1	MSTRG.10295	.	chr4	63598894	63601297	u	0	4.33886	3.95116	0
MSTRG.10297.2	Wdr91	-	chr4	63547485	63591770	k	0.843421	1.70704	1.44978	1.44117
MSTRG.10298.1	RGD1565367	-	chr4	63631335	63679076	m	1.99373	1.65425	1.17913	1.40627
MSTRG.10299.2	Cnot4	-	chr4	63735026	63814308	j	1.29802	1.61018	1.97995	1.03471
MSTRG.10303.1	MSTRG.10303	+	chr4	64156863	64158784	u	34.3522	36.6897	37.5882	35.9309
MSTRG.10305.1	Ptn	-	chr4	65293732	65375581	j	6.23464e-06	4.62086e-06	1.2565	2.7065
MSTRG.10306.1	Creb3l2	-	chr4	65907431	66023810	j	5.40057	4.09699	3.32656	3.90761
MSTRG.10306.3	Creb3l2	-	chr4	65907594	66004613	j	13.5869	13.588	16.5753	16.3883
MSTRG.10307.1	Trim24	+	chr4	66531494	66692467	j	3.4718	4.13829	3.30087	3.06796
MSTRG.10307.2	Trim24	+	chr4	66566565	66692467	j	3.14759	3.16409	2.31555	1.83669
MSTRG.10307.3	Trim24	+	chr4	66566565	66692467	j	2.41952	1.84151	2.32009	2.18146
MSTRG.10308.1	MSTRG.10308	-	chr4	66991341	67001795	u	1.4538	1.67339	1.64794	2.1818
MSTRG.1031.1	Lrrc51	-	chr1	156278618	156297774	j	1.60001	1.06151	2.34188	1.73649
MSTRG.10310.1	Zc3hav1	-	chr4	67012156	67063348	j	2.04523	2.0294	3.1175	2.61586
MSTRG.10310.2	Zc3hav1	-	chr4	67012156	67063348	j	3.07035	6.85905	6.44319	10.5694
MSTRG.10310.3	Zc3hav1	-	chr4	67012164	67063348	j	5.44132	0.00192486	3.44764	0.0346299
MSTRG.10313.1	Ubn2	+	chr4	67163759	67239485	m	1.30684	0.994536	1.03437	1.33784
MSTRG.10313.2	Ubn2	+	chr4	67166346	67239485	m	3.11597	2.51054	2.04184	2.33393
MSTRG.10314.1	MSTRG.10314	-	chr4	67363937	67374177	u	2.80336	2.23958	2.11301	4.93584
MSTRG.10315.1	MSTRG.10315	.	chr4	67429905	67430608	u	5.13276	3.96203	4.07677	2.94162
MSTRG.10316.1	Clec2l	+	chr4	67397986	67414537	j	1.62511	2.55564	3.23085	3.29498
MSTRG.10317.10	Luc7l2	+	chr4	67287661	67352732	j	0.0298274	2.00722	2.95948	1.49805
MSTRG.10317.4	Luc7l2	+	chr4	67287603	67352732	j	1.21272	1.03047	1.1786	0.40514
MSTRG.10317.5	Luc7l2	+	chr4	67287609	67352732	j	7.86394	9.29307	7.35903	8.06988
MSTRG.10317.6	Luc7l2	+	chr4	67287625	67352732	j	6.49793e-24	0.756408	0.290753	2.09747
MSTRG.10317.7	Luc7l2	+	chr4	67287661	67352732	j	4.24247	1.49175	1.43537	2.43701
MSTRG.10318.1	MSTRG.10318	-	chr4	67431058	67433232	u	2.87416	2.75442	2.60249	1.35456
MSTRG.10319.1	Hipk2	-	chr4	67433446	67619585	j	2.52541	1.20637	1.92765	1.36162
MSTRG.1032.1	Numa1	+	chr1	156297903	156372909	j	13.3316	28.5517	28.605	18.9603
MSTRG.1032.5	Numa1	+	chr1	156326529	156372909	j	12.195	3.27536	1.77146	0.874432
MSTRG.1032.7	Numa1	+	chr1	156327058	156372909	j	0.847641	2.00146	6.87687	3.11302
MSTRG.10320.1	MSTRG.10320	-	chr4	67899440	67909816	u	2.9438	3.49114	2.91581	2.6774
MSTRG.10321.2	Tbxas1	+	chr4	67665075	67837096	m	0.781709	0.58836	1.45525	2.2273
MSTRG.10322.1	Parp12	-	chr4	67839030	67872645	n	1.86207	2.26578	1.71834	1.37843
MSTRG.10326.1	Mkrn1	-	chr4	68175935	68197219	j	17.7921	16.08	14.2685	17.1101
MSTRG.10326.2	Mkrn1	-	chr4	68175965	68197219	j	0.602265	0.495516	1.6891	2.54846
MSTRG.10327.1	MSTRG.10327	-	chr4	68233024	68332074	u	4.05235	5.71626	4.97138	7.21812
MSTRG.10329.2	MSTRG.10329	-	chr4	68363154	68367410	u	0.825332	1.60575	1.88894	1.49955
MSTRG.1033.1	Rnf121	-	chr1	156372923	156439923	k	7.42874	7.03842	7.13799	7.58915
MSTRG.10330.1	MSTRG.10330	-	chr4	68378673	68511010	u	1.86986	1.07759	0.765667	2.01693
MSTRG.10331.1	Mrps33	-	chr4	68593902	68605494	k	3.40868	2.74731	3.86704	2.48896
MSTRG.10333.1	Dennd11	-	chr4	69197173	69228738	k	3.03714	2.75501	2.83963	2.46187
MSTRG.10334.1	MSTRG.10334	-	chr4	69234381	69266008	u	3.02643	2.90216	0.565376	2.10327
MSTRG.10335.2	Ssbp1	+	chr4	69266130	69276199	j	4.33238	2.3597	2.57064	3.08035
MSTRG.10341.1	MSTRG.10341	+	chr4	71146893	71149300	u	4.73005	3.47456	1.82854	1.61305
MSTRG.10342.1	Casp2	+	chr4	71149656	71167388	j	2.62009	2.47344	1.99408	2.50859
MSTRG.10345.2	Zyx	+	chr4	71237246	71246552	n	5.79915	4.45612	5.72629	5.52136
MSTRG.10345.3	Zyx	+	chr4	71237267	71246552	j	11.8576	8.87956	10.9177	10.334
MSTRG.10348.1	MSTRG.10348	-	chr4	71553735	71566458	u	13.5672	10.1939	8.40805	6.55257
MSTRG.10349.1	MSTRG.10349	-	chr4	71589756	71639263	u	2.23624	2.45511	2.63361	1.76593
MSTRG.10349.2	MSTRG.10349	-	chr4	71589846	71613477	u	2.28427	2.91748	2.71445	3.7485
MSTRG.1035.2	Nup98	-	chr1	156494472	156591522	j	6.68167	8.68922	7.11522	7.66668
MSTRG.10350.1	MSTRG.10350	+	chr4	72087175	72112378	u	6.00869	6.01157	4.55978	4.0606
MSTRG.10352.1	Cul1	+	chr4	76549253	76620164	j	1.94276	1.74982	1.75634	2.18696
MSTRG.10353.1	Ezh2	-	chr4	76620827	76687362	j	1.17661	0.886333	1.96051	1.14294
MSTRG.10354.2	MSTRG.10354	-	chr4	76766971	76779756	u	1.01931	1.5376	0.957766	0.980611
MSTRG.10354.5	MSTRG.10354	-	chr4	76766971	76779756	u	0.938726	1.35761	0.984493	0.99934
MSTRG.10355.1	MSTRG.10355	+	chr4	76767682	76774425	u	1.28504	2.83164	2.01405	2.048
MSTRG.10356.1	Pdia4	-	chr4	76803203	76822245	m	45.6565	38.6354	44.3547	75.2161
MSTRG.10358.1	MSTRG.10358	.	chr4	76878515	76881058	u	2.15681	2.21139	1.78339	2.02977
MSTRG.1036.1	Pgap2	+	chr1	156591619	156618710	j	5.28318	4.79672	8.36535	6.52802
MSTRG.1036.3	Pgap2	+	chr1	156591651	156618710	j	1.95432	1.89154	2.14349	1.71209
MSTRG.1036.4	Pgap2	+	chr1	156602741	156618710	j	2.56677	1.21512	0.85413	0.886936
MSTRG.10360.1	MSTRG.10360	+	chr4	76923671	76936060	u	7.06946	6.73199	6.10196	6.30527
MSTRG.10361.1	Zfp956	+	chr4	76943786	76967238	j	1.58801	2.02821	2.27193	2.07288
MSTRG.10362.1	Zfp777	-	chr4	77016363	77046729	k	1.08507	0.89071	1.01559	1.0627
MSTRG.10363.2	Zfp746	-	chr4	77055008	77079297	j	2.38065	2.75692	2.39012	1.99686
MSTRG.10364.1	MSTRG.10364	+	chr4	77340930	77363062	u	2.08001	1.79944	2.22507	1.35665
MSTRG.10364.2	MSTRG.10364	+	chr4	77341595	77363062	u	0.000497621	0.00158609	1.94755	1.96545
MSTRG.10364.3	MSTRG.10364	+	chr4	77341647	77363062	u	8.5163	9.47174	6.42738	7.92426
MSTRG.10365.1	Zfp467	-	chr4	77383649	77394510	j	2.51095	2.58773	2.63574	2.44929
MSTRG.10367.2	MSTRG.10367	+	chr4	77452972	77481906	u	0.408064	0.752837	0.913432	1.70205
MSTRG.10367.3	MSTRG.10367	+	chr4	77452978	77481906	u	0.845796	1.31993	1.01021	1.42481
MSTRG.10367.4	MSTRG.10367	+	chr4	77470246	77481906	u	4.67212	5.31257	4.14689	7.0649
MSTRG.10368.2	Lrrc61	+	chr4	77503879	77521950	j	0.997133	2.36079	1.78993	2.67322
MSTRG.10369.1	Rarres2	-	chr4	77522549	77525712	j	2.37729	0.848525	5.98539	3.29371
MSTRG.10369.2	Rarres2	-	chr4	77522549	77525712	j	49.7191	52.1476	53.634	68.7272
MSTRG.1037.1	Rhog	-	chr1	156618713	156630230	j	0.810751	2.24879	1.26391	2.51103
MSTRG.10370.1	Repin1	+	chr4	77549198	77554221	k	1.45747	1.73435	1.20816	1.21037
MSTRG.10370.2	Repin1	+	chr4	77549198	77554221	k	1.12787	2.73707	2.81778	2.29913
MSTRG.10370.3	Repin1	+	chr4	77549230	77554221	o	1.57121	0.731539	0.645108	1.54628
MSTRG.10370.4	Repin1	+	chr4	77549235	77554221	k	0.778556	0.696677	1.27628	0.747514
MSTRG.10371.1	Zfp775	+	chr4	77557121	77575388	j	3.49489	0.806212	2.40535	2.51486
MSTRG.10371.2	Zfp775	+	chr4	77557130	77575388	m	1.22936	1.62289	1.58348	1.47664
MSTRG.10374.1	MSTRG.10374	.	chr4	77629660	77630336	p	3.91564	4.52557	6.11956	2.63616
MSTRG.10378.1	Gimap1	+	chr4	77687565	77691700	j	1.30243	2.35045	1.55776	1.18466
MSTRG.10381.1	Tmem176b	-	chr4	77766929	77774780	j	4.02154	2.21577	4.17498e-08	4.25396
MSTRG.10381.2	Tmem176b	-	chr4	77766929	77774780	j	0.000211809	0.000143502	0.0001237	2.0059
MSTRG.10382.1	Tmem176a	+	chr4	77774868	77778620	k	82.8743	96.38	79.9376	76.5107
MSTRG.10384.1	MSTRG.10384	.	chr4	78269911	78270680	u	1.46699	1.75585	1.45959	2.49617
MSTRG.10386.1	MSTRG.10386	.	chr4	78330515	78331144	u	7.26413	8.04028	3.66172	2.96773
MSTRG.10388.2	Tra2a	-	chr4	78220876	78240129	j	7.10096	11.1967	6.18019	6.6974
MSTRG.10388.4	Tra2a	-	chr4	78220888	78240129	j	0.773154	1.71695	0.647312	0.57464
MSTRG.10388.5	Tra2a	-	chr4	78220888	78237267	j	4.8446	5.3361	4.05177	4.53086
MSTRG.10388.6	Tra2a	-	chr4	78220888	78237267	j	7.19621	2.9276	3.32336	2.29495
MSTRG.10389.1	MSTRG.10389	.	chr4	78556498	78556783	u	12.8046	3.4256	17.7502	18.4209
MSTRG.1039.1	Stim1	+	chr1	156655435	156818783	j	5.16952	7.4506	8.21054	4.39662
MSTRG.10391.2	Mpp6	+	chr4	79173408	79258337	j	1.04431	1.00361	2.11986	0.835808
MSTRG.10392.1	Dfna5	-	chr4	79253997	79320975	j	1.08064	1.36472	1.2735	1.62413
MSTRG.10393.1	MSTRG.10393	-	chr4	79346598	79523475	u	4.81081	5.6959	4.53943	1.02117
MSTRG.10393.2	MSTRG.10393	-	chr4	79346602	79523475	u	3.86122	2.90814	1.0676	2.96664
MSTRG.10397.1	MSTRG.10397	.	chr4	80269865	80271886	u	15.1756	15.5487	15.8769	13.8558
MSTRG.10398.1	Cbx3	+	chr4	80545934	80559284	j	4.13865	4.48987	4.53754	8.30994
MSTRG.104.2	Trmt11	+	chr1	27054448	27110107	j	3.25582	3.90773	2.5	3.3343
MSTRG.1040.1	Trim21	-	chr1	156964756	156987463	k	1.71226	1.87221	0.885595	1.48092
MSTRG.1040.2	Trim21	-	chr1	156964900	156987463	j	2.99328	3.96746	1.16676	1.42401
MSTRG.1040.3	Trim21	-	chr1	156964954	156987463	j	1.29555	0.354483	3.8509	1.96972
MSTRG.10400.1	Hnrnpa2b1	-	chr4	80534372	80545260	j	5.18016	4.49206	4.49914	2.96121
MSTRG.10400.2	Hnrnpa2b1	-	chr4	80534372	80545260	j	3.37727	3.50661	2.55246	3.63903
MSTRG.10400.3	Hnrnpa2b1	-	chr4	80536777	80545260	j	0.847642	1.48672	0.934452	0.593958
MSTRG.10400.4	Hnrnpa2b1	-	chr4	80536780	80545260	j	61.6156	70.9217	59.3786	63.3959
MSTRG.10400.5	Hnrnpa2b1	-	chr4	80536787	80545260	j	29.1162	22.6721	26.4516	30.583
MSTRG.10400.6	Hnrnpa2b1	-	chr4	80536787	80545260	j	16.0241	19.006	25.9932	22.5434
MSTRG.10400.7	Hnrnpa2b1	-	chr4	80536787	80545260	j	7.17267	8.42058	3.92331	9.25495
MSTRG.10401.2	Snx10	+	chr4	80631794	80676986	j	2.96762	2.38668	0.737711	1.21818
MSTRG.10402.1	Skap2	-	chr4	80948808	81100911	j	2.02152	3.02926	2.02599	2.93448
MSTRG.10402.2	Skap2	-	chr4	80948863	81100911	j	1.36833	1.39747	2.46417	2.11208
MSTRG.10403.1	Hoxa7	-	chr4	81314640	81319639	k	3.40643	3.60175	2.74067	2.35986
MSTRG.10407.2	Hoxa5	-	chr4	81301584	81313476	k	10.5793	10.9845	7.08248	6.91313
MSTRG.10409.1	MSTRG.10409	+	chr4	81291923	81293669	i	2.56006	3.55244	1.98994	2.82904
MSTRG.10411.1	Mir196b-2	-	chr4	81323277	81341270	k	2.5264	1.55048	1.55697	1.28508
MSTRG.10411.2	Mir196b-2	-	chr4	81323277	81341270	k	5.6098	4.24145	4.09299	3.41664
MSTRG.10411.3	MSTRG.10411	-	chr4	81323277	81330302	u	3.33283	3.98253	3.26807	3.94608
MSTRG.10411.5	MSTRG.10411	-	chr4	81323308	81341270	y	14.6882	12.2658	11.357	13.2329
MSTRG.10411.8	MSTRG.10411	-	chr4	81332749	81341270	u	2.58664	2.7174	2.32722	3.09295
MSTRG.10412.1	Hoxa11	-	chr4	81342260	81361932	k	6.01447	5.25806	4.51615	6.49251
MSTRG.10413.2	Hoxa11-as	+	chr4	81347063	81350190	j	2.56238	2.81044	1.76597	2.16058
MSTRG.10415.1	MSTRG.10415	+	chr4	81361126	81368443	u	2.76256	2.69434	2.15932	2.39323
MSTRG.10415.2	MSTRG.10415	+	chr4	81361970	81368443	u	1.36565	1.69218	0.915771	0.978418
MSTRG.10416.1	Hibadh	-	chr4	81649180	81747328	j	3.06216	3.85669	1.63857	0.774627
MSTRG.10419.1	MSTRG.10419	-	chr4	81879507	82183241	u	6.19708	7.33004	7.34316	9.87475
MSTRG.1042.1	MSTRG.1042	-	chr1	157114110	157127477	u	4.31895	5.3512	5.07418	3.75953
MSTRG.10420.1	Tax1bp1	+	chr4	81821965	81878177	j	7.04711	6.1416	7.44642	5.35414
MSTRG.10420.2	Tax1bp1	+	chr4	81822020	81878177	j	1.34078	2.21326	1.25025	1.84691
MSTRG.10422.1	Creb5	+	chr4	82393309	82394722	n	0.883444	3.73966	1.34927	2.0339
MSTRG.10422.3	Creb5	+	chr4	82668588	82794313	j	1.68934	2.13951	2.08187	3.00898
MSTRG.10424.1	Chn2	+	chr4	83148205	83407676	j	2.14073	1.94889	2.85852	2.61557
MSTRG.10425.1	Wipf3	+	chr4	83550468	83629922	j	5.6285	10.4644	10.1063	7.89077
MSTRG.10425.3	Wipf3	+	chr4	83585999	83629922	j	1.21595	3.0892	2.09935	1.58527
MSTRG.10426.1	Scrn1	-	chr4	83632131	83694010	m	3.32334	5.05223	2.61668	3.37767
MSTRG.10427.1	MSTRG.10427	+	chr4	83632156	83633393	u	7.10067	4.57005	5.14844	2.2319
MSTRG.10428.1	Fkbp14	-	chr4	83705535	83721508	j	10.1	11.7783	11.6901	18.3708
MSTRG.1043.1	Olr63	+	chr1	157142230	157152183	k	1.68661	2.92771	4.51406	3.38566
MSTRG.10431.1	Znrf2	+	chr4	83949673	84032661	j	1.30699	1.9005	1.85286	1.5028
MSTRG.10432.1	Nod1	-	chr4	84060871	84071664	j	0.71807	0.0738363	3.1643	0.0400939
MSTRG.10433.1	Ggct	-	chr4	84123118	84129277	j	3.00555	2.62186	3.34955	3.4536
MSTRG.10434.1	MSTRG.10434	.	chr4	84151903	84152337	u	16.1525	15.9599	10.8313	22.1406
MSTRG.10436.1	MSTRG.10436	.	chr4	84281728	84288140	u	2.02601	0.789632	1.09232	0.416502
MSTRG.10437.1	Crhr2	-	chr4	84222727	84266056	n	1.22681	1.98836	2.36548	0.102219
MSTRG.10437.2	Crhr2	-	chr4	84222727	84266056	n	1.50472	2.69033	1.20577	0.286692
MSTRG.10437.3	Crhr2	-	chr4	84222727	84266056	j	1.52907	3.01419	1.06601	1.32891e-13
MSTRG.1044.1	MSTRG.1044	.	chr1	157405248	157405636	u	2.54925	5.06791	4.53246	2.2938
MSTRG.10440.1	MSTRG.10440	+	chr4	84358839	84467375	u	1.73488	2.90723	2.04719	2.60852
MSTRG.10442.1	Aqp1	+	chr4	84482512	84494690	j	10.6411	0.0113656	0.00784634	0.0043532
MSTRG.10445.1	MSTRG.10445	.	chr4	85270455	85270696	u	11.0745	6.12516	0	7.81196
MSTRG.10448.1	MSTRG.10448	+	chr4	85961567	86006118	u	4.14538	3.17838	2.97024	3.56538
MSTRG.10449.2	Kbtbd2	-	chr4	86027979	86050462	j	8.42461	0.296417	4.95074	0.458811
MSTRG.1045.2	Trim34	+	chr1	158707178	158719698	m	3.77215	4.10054	3.40631	3.16596
MSTRG.10452.1	MSTRG.10452	.	chr4	86446218	86446971	u	1.10151	1.35957	1.76843	1.53193
MSTRG.10454.2	Vopp1	+	chr4	87363560	87432747	j	0.522374	0.184562	2.37117	0.472188
MSTRG.10457.1	MSTRG.10457	-	chr4	87524219	87561340	u	2.06694	2.37627	2.5882	1.52945
MSTRG.10458.1	Ppm1k	+	chr4	87612194	87638989	j	2.79599	0.174068	1.66912	1.14409
MSTRG.10458.2	Ppm1k	+	chr4	87612204	87638989	k	0.840463	3.50095	1.44683	1.57429
MSTRG.1046.1	Trim5	-	chr1	158718993	158736996	j	1.18115	1.12748	1.24486	1.06659
MSTRG.10460.1	Herc3	+	chr4	87952247	88042492	j	5.65437	5.1433	5.3628	3.15623
MSTRG.10463.1	Fam13a	-	chr4	88056565	88155745	j	3.80767	5.47634	7.07828	3.13107
MSTRG.10464.1	Snca	-	chr4	89696420	89797228	j	2.53296	1.31596	0.328877	1.33966e-05
MSTRG.10465.1	MSTRG.10465	+	chr4	89903354	89950814	u	3.98895	7.20954	3.6003	8.83566
MSTRG.10465.2	MSTRG.10465	+	chr4	89903354	89950814	u	1.94989	5.23009	5.86215	4.87642
MSTRG.10465.3	MSTRG.10465	+	chr4	89903366	89950814	u	1.75209	5.74828e-05	5.42483	8.1851e-05
MSTRG.10466.1	MSTRG.10466	.	chr4	92100978	92101295	u	3.31888	10.8901	11.4572	10.4114
MSTRG.10467.1	MSTRG.10467	+	chr4	94944409	94981812	u	1.08462	1.0107	1.26336	2.85402
MSTRG.10468.1	Smarcad1	+	chr4	94311334	94372815	k	0.832762	0.781188	0.995873	1.48136
MSTRG.1047.11	Hbb	-	chr1	158236967	158251832	j	102.336	306.137	122.076	825.079
MSTRG.1047.12	Hbb	-	chr1	158236967	158251832	j	2.00994	8.66248	2.09508	10.5643
MSTRG.1047.14	LOC100134871	-	chr1	158236967	158245074	j	2.96558	3.84924	1.18432	10.8066
MSTRG.1047.2	LOC100134871	-	chr1	158218356	158251832	j	1.42087	4.62906	0.369059	5.00414
MSTRG.1047.20	Hbb	-	chr1	158243693	158251832	j	335.541	2.74042	22.5138	10.6676
MSTRG.1047.5	Hbb-bs	-	chr1	158218382	158231797	j	2.78068	0.000601555	1.6783e-62	1.93419e-134
MSTRG.1047.8	Hbb-b1	-	chr1	158224192	158245074	j	12.4824	29.2632	3.07662	26.8768
MSTRG.1047.9	Hbb-b1	-	chr1	158224192	158245074	j	7.62477	29.6965	5.59643	57.0285
MSTRG.10470.1	MSTRG.10470	+	chr4	95075752	95238079	u	3.92385	4.58849	4.70746	7.11904
MSTRG.10471.1	Mad2l1	+	chr4	95906782	95915012	m	1.60219	1.51446	1.56583	1.7079
MSTRG.10472.1	Gng12	+	chr4	96011133	96134767	k	30.7734	33.2426	33.4071	29.2546
MSTRG.10474.1	MSTRG.10474	+	chr4	96200471	96204441	u	1.67698	1.98604	2.42675	1.26616
MSTRG.10477.1	MSTRG.10477	.	chr4	101378020	101378494	u	2.6796	5.34308	5.48945	2.21312
MSTRG.10478.1	Serbp1	+	chr4	96401594	96427066	j	3.30815	3.40449	4.22547	3.62402
MSTRG.10478.2	Serbp1	+	chr4	96401594	96427066	j	2.92089	3.75568	3.57101	2.17113
MSTRG.10478.3	Serbp1	+	chr4	96401604	96427066	j	3.28987	2.84088	2.82498	3.00321
MSTRG.10478.4	Serbp1	+	chr4	96401604	96419571	j	28.8997	32.1989	27.8416	47.1637
MSTRG.1048.1	Fam160a2	-	chr1	159718679	159748423	j	2.17152	2.10172	1.89563	1.74632
MSTRG.10480.1	MSTRG.10480	.	chr4	96473695	96474721	i	27.3007	2.83484	2.28531	1.79862
MSTRG.10481.1	MSTRG.10481	.	chr4	101379139	101379524	u	1.82226	4.93033	2.43543	0.780723
MSTRG.10482.1	MSTRG.10482	+	chr4	102679862	102688461	u	0.566897	2.00078	1.14568e-05	2.0585e-15
MSTRG.10482.2	MSTRG.10482	+	chr4	102679862	102688461	u	0.0693084	3.04556	1.15023	3.44404e-10
MSTRG.10482.3	MSTRG.10482	+	chr4	102683602	102688461	u	3.25156	6.58383	6.14483	1.84765
MSTRG.10482.4	MSTRG.10482	+	chr4	102683837	102688461	u	9.44967e-15	2.38737	0.295832	3.8114e-07
MSTRG.10482.5	MSTRG.10482	+	chr4	102684209	102688461	u	1.72923e-11	4.18142	0.391954	1.18085e-05
MSTRG.10482.6	MSTRG.10482	+	chr4	102685166	102688461	u	0.325218	1.68368	0.59707	4.99685
MSTRG.10484.1	MSTRG.10484	+	chr4	102784043	102788760	u	1.7045	1.98258	1.31759	1.08528
MSTRG.10485.1	MSTRG.10485	.	chr4	102797365	102797565	u	259.076	231.83	204.435	261.119
MSTRG.10486.1	Eif2ak3	+	chr4	102805510	102866914	j	0.00271745	0.0202861	0.586011	4.40896
MSTRG.10487.2	Thnsl2	-	chr4	103112985	103132090	j	0.0908553	0.00265296	2.06818	0.102215
MSTRG.10487.3	Thnsl2	-	chr4	103112986	103132090	j	3.50354	3.64608	1.65381	3.5053
MSTRG.10487.5	Thnsl2	-	chr4	103112993	103132090	j	0.913803	1.73481	0.103098	1.25193
MSTRG.10488.1	Smyd1	-	chr4	103195190	103252956	j	2.28592	1.76141	1.97854	3.44582e-06
MSTRG.10488.2	Smyd1	-	chr4	103196089	103252956	k	7.44523	8.2583	6.92127	0.00850014
MSTRG.1049.1	MSTRG.1049	+	chr1	159718682	159721816	u	1.69064	2.14698	2.03005	2.04973
MSTRG.10490.1	Krcc1	+	chr4	103261687	103274670	j	7.15339	8.43251	4.80764	11.912
MSTRG.10491.1	MSTRG.10491	-	chr4	103375845	103432594	u	11.3208	12.1504	11.362	11.5874
MSTRG.10491.2	MSTRG.10491	-	chr4	103375846	103432594	u	7.05357	6.50701	7.42337	3.37622
MSTRG.10492.1	Rnf103	+	chr4	103525581	103543248	j	4.9394	4.68075	4.28488	4.96047
MSTRG.10493.1	Chmp3	+	chr4	103576440	103624317	j	2.70776	2.36227	3.01631	3.39412
MSTRG.10494.2	Reep1	+	chr4	103746126	103862337	j	0.973742	2.84803	1.20655	1.69123e-06
MSTRG.10496.2	Kdm3a	-	chr4	103630946	103675194	m	1.25098	1.98943	2.84463	2.20691
MSTRG.10496.3	Kdm3a	-	chr4	103630981	103660813	n	9.25082	8.84458	7.97619	8.42929
MSTRG.10497.4	Immt	+	chr4	103880440	103916700	j	3.13376	2.39587	4.11614	3.97794
MSTRG.10497.8	Immt	+	chr4	103880484	103916700	j	0.00105442	3.5027	2.60956e-11	7.11693e-06
MSTRG.10497.9	Immt	+	chr4	103880488	103916700	j	1.9022	1.94762	1.67574	2.01117
MSTRG.10498.1	St3gal5	+	chr4	104134613	104192557	j	7.42431	6.00563	5.83845	5.84133
MSTRG.105.1	Rspo3	+	chr1	28283462	28368573	j	1.08885	1.25326	2.38194	3.38854
MSTRG.10500.2	Ptcd3	-	chr4	103922492	103949728	j	0.459649	3.6509e-05	4.07295	2.98939
MSTRG.10502.1	Usp39	-	chr4	104373902	104400263	j	11.6768	9.13368	11.0267	9.41653
MSTRG.10503.1	MSTRG.10503	+	chr4	104402575	104408328	u	7.04502	6.44002	6.73335	6.1547
MSTRG.10504.1	Vamp8	-	chr4	104442126	104447514	k	80.6319	55.6904	54.0732	58.133
MSTRG.10505.1	MSTRG.10505	+	chr4	104447449	104455439	u	1.01067	1.23246	1.68172	0.950271
MSTRG.10506.1	Tmem150a	+	chr4	104410174	104414630	j	4.88793	3.68022	5.35963	6.56407
MSTRG.10506.2	Tmem150a	+	chr4	104410521	104414630	k	12.9769	11.8659	13.2562	12.8108
MSTRG.10507.1	Rnf181	-	chr4	104414586	104435352	k	12.462	10.5773	11.4607	10.4073
MSTRG.10507.3	Vamp5	-	chr4	104414636	104435352	k	1.59977	1.63081	1.69261	1.5044
MSTRG.10508.1	MSTRG.10508	-	chr4	104566265	104568572	u	1.90013	1.53134	0.943902	1.9168
MSTRG.10509.1	Ggcx	+	chr4	104469715	104488264	j	1.49943	0.534869	1.28772	1.31291
MSTRG.1051.1	Arfip2	-	chr1	159974248	159980336	j	15.7829	13.7181	10.2694	20.496
MSTRG.1051.2	Arfip2	-	chr1	159975654	159980336	j	47.2277	56.0554	42.2785	67.5399
MSTRG.10510.1	Mat2a	-	chr4	104488379	104497113	m	36.5089	36.7992	35.5727	26.7444
MSTRG.10511.1	Capg	+	chr4	104594682	104612527	j	68.3811	58.6575	38.2377	49.1755
MSTRG.10511.2	Capg	+	chr4	104594682	104612527	j	2.7558	2.14531	0.330721	1.02804
MSTRG.10511.3	Capg	+	chr4	104594682	104612527	j	10.0277	6.77707	6.3094	6.90774
MSTRG.10511.4	Capg	+	chr4	104594717	104612527	j	0.836914	1.75671	4.87032	6.78612
MSTRG.10511.8	Capg	+	chr4	104599927	104612527	j	2.2735	0.54596	0.974776	1.25476
MSTRG.10511.9	Capg	+	chr4	104599927	104612527	j	1.16537	1.32018	0.255112	0.422601
MSTRG.10512.1	Elmod3	-	chr4	104614675	104653069	j	5.92354	5.82849	6.15636	5.81916
MSTRG.10513.1	Retsat	+	chr4	104653184	104663303	j	3.91841	3.51259	7.31601	5.69088
MSTRG.10515.1	Tcf7l1	-	chr4	104680739	104846151	j	2.63994	1.7956	3.61807	2.58164
MSTRG.10517.1	Kcmf1	-	chr4	104888023	104949470	j	4.49059	3.99104	5.93946	3.33765
MSTRG.10518.2	Tmsb10	-	chr4	105009985	105011018	j	110.955	102.075	106.129	203.515
MSTRG.10519.1	Suclg1	+	chr4	105308236	105317430	j	2.72317	2.63569	2.17455	1.87753
MSTRG.1052.1	Timm10b	+	chr1	159980525	159983371	m	2.89501	2.41289	2.37126	2.29901
MSTRG.10521.1	MSTRG.10521	+	chr4	113767448	113773763	u	0	0.492403	2.94719	0.523599
MSTRG.10523.1	LRRTM1	+	chr4	109701766	109717184	j	0.568556	2.51895	1.04382	1.09342
MSTRG.10525.1	Gcfc2	+	chr4	114481640	114521753	j	2.26845	2.15141	2.156	2.17984
MSTRG.10527.1	Dctn1	+	chr4	115671039	115703825	j	6.12279	1.42135	4.72965	0.552024
MSTRG.10527.2	Dctn1	+	chr4	115671039	115703825	j	22.9236	12.6447	13.0718	19.6883
MSTRG.10527.3	Dctn1	+	chr4	115671043	115703825	j	1.61471	19.7725	21.1077	20.1648
MSTRG.10527.4	Dctn1	+	chr4	115671049	115703825	j	7.38255	3.46047	5.34402	4.36505
MSTRG.10528.2	Tacr1	+	chr4	115000600	115090874	j	2.98764	2.3056	3.63494	1.84297
MSTRG.10531.1	Pcgf1	+	chr4	115583335	115587011	m	3.46305	3.2254	2.63298	2.47725
MSTRG.10531.2	Pcgf1	+	chr4	115584368	115587011	n	3.81301	5.97672	3.46238	6.11448
MSTRG.10532.1	MSTRG.10532	-	chr4	115867419	115949316	u	4.5691	4.38883	4.14051	4.13947
MSTRG.10534.1	Mrpl53	+	chr4	115608468	115616218	m	8.85495	9.34276	10.1588	8.68399
MSTRG.10535.2	Dok1	-	chr4	115537464	115540495	m	0.323401	0.697176	0.592115	1.55661
MSTRG.10537.2	Htra2	-	chr4	115557124	115560188	j	2.81857	3.45709	3.17769	5.77993
MSTRG.10537.5	Htra2	-	chr4	115557124	115560188	j	2.06385	2.50738	2.0152	3.48784
MSTRG.10538.1	Dqx1	+	chr4	115560278	115572590	j	3.55617	4.1728	2.85796	3.19653
MSTRG.10539.1	Hk2	-	chr4	115233057	115261503	j	4.37148	2.44418	2.10334	1.57804
MSTRG.10539.2	Hk2	-	chr4	115233072	115283530	k	5.76939	4.66441	4.09022	3.88686
MSTRG.1054.1	Apbb1	-	chr1	159896880	159920154	j	13.288	17.6312	18.3422	19.5859
MSTRG.1054.7	Trim3	-	chr1	159950923	159973638	n	2.31731	2.43232	1.9789	2.20411
MSTRG.1054.8	Trim3	-	chr1	159950923	159973638	n	1.47798	1.89388	2.28839	2.20394
MSTRG.1054.9	Trim3	-	chr1	159952277	159973638	n	1.35785	1.97316	1.12616	0.80082
MSTRG.10541.1	Mogs	+	chr4	115621548	115625035	m	2.9339	3.90351	4.45556	6.55936
MSTRG.10542.1	Wbp1	-	chr4	115625168	115627906	j	12.3487	9.87964	13.2031	7.952
MSTRG.10542.2	Wbp1	-	chr4	115625168	115627906	j	10.5108	11.1663	8.47795	7.78737
MSTRG.10542.4	Ino80b	-	chr4	115625168	115631271	k	3.41337	3.54918	3.15998	3.07238
MSTRG.10542.8	MSTRG.10542	-	chr4	115639872	115643159	x	2.0008	1.04734	4.21082e-225	0.970978
MSTRG.10543.1	Rtkn	+	chr4	115640109	115657948	j	3.32	2.99823	1.72308	3.57694
MSTRG.10543.3	Rtkn	+	chr4	115641949	115657948	j	2.40348	3.45073	2.51425	2.31578
MSTRG.10543.5	Rtkn	+	chr4	115643432	115657948	j	14.2491	11.8176	5.87306	10.3871
MSTRG.10544.2	Wdr54	-	chr4	115658077	115661562	m	2.59561	2.94691	4.16131	3.66099
MSTRG.10544.3	Wdr54	-	chr4	115658079	115661562	j	1.68068	0.962823	1.79666	2.32883
MSTRG.10544.4	Wdr54	-	chr4	115658081	115661562	n	2.43309	3.02465	3.46741	2.90759
MSTRG.10546.2	Dguok	-	chr4	115987669	116014733	j	14.7152	14.5825	19.4486	12.6268
MSTRG.10546.3	Dguok	-	chr4	115987669	116014733	j	3.8156	3.99364	4.31438	3.81768
MSTRG.10546.4	Dguok	-	chr4	115987669	116014733	j	1.14467	1.35568	0.0706968	0.406596
MSTRG.10546.5	Dguok	-	chr4	115987687	116014733	j	4.9515	6.41165	5.82601	5.76568
MSTRG.10546.6	Dguok	-	chr4	115995492	116014733	j	0.0651635	0.547215	1.50449	1.11428
MSTRG.10547.1	MSTRG.10547	+	chr4	116014782	116016976	u	5.17488	4.42546	3.85885	4.09949
MSTRG.10548.1	Actg2	-	chr4	116021832	116046558	k	344.335	362.895	402.216	189.953
MSTRG.10549.2	Stambp	-	chr4	116056086	116080571	j	13.0845	12.3309	11.9608	13.0191
MSTRG.10551.1	Tex261	-	chr4	116245945	116260444	k	2.00124	2.39286	2.0614	2.20645
MSTRG.10551.2	Tex261	-	chr4	116249490	116260444	j	6.03688	5.00569	5.48419	4.92322
MSTRG.10552.1	Nagk	+	chr4	116280985	116288672	j	2.15999	2.04931	1.34763	2.882
MSTRG.10552.2	Nagk	+	chr4	116281357	116294681	j	3.64888	2.79721	2.48106	2.38981
MSTRG.10553.1	MSTRG.10553	-	chr4	116291016	116323381	u	5.4688	4.74497	5.00023	4.57143
MSTRG.10554.3	Zfp638	+	chr4	116402464	116475055	j	5.48347	7.09189	6.35769	6.26398
MSTRG.10559.1	Dysf	+	chr4	116489771	116690709	j	2.76357	3.02201	4.32247	1.58397
MSTRG.10559.2	Dysf	+	chr4	116490643	116690709	j	0.227429	0.249872	1.217	3.78344
MSTRG.10559.4	Dysf	+	chr4	116502268	116690709	j	1.17487	2.02535	6.49405	1.24959
MSTRG.10559.5	Dysf	+	chr4	116502432	116690709	j	2.75916	2.85255	1.22673	0.00317785
MSTRG.10559.7	Dysf	+	chr4	116614790	116690709	j	17.877	19.9378	22.9111	14.8757
MSTRG.1056.1	Rrp8	-	chr1	160084282	160088766	m	3.102	2.9049	2.2419	2.87178
MSTRG.10561.1	MSTRG.10561	-	chr4	117871304	117908805	u	20.56	20.9637	21.869	23.1585
MSTRG.10561.2	MSTRG.10561	-	chr4	117871304	117908805	u	3.39506	5.23757	4.34614	6.71914
MSTRG.10561.3	MSTRG.10561	-	chr4	117871304	117908805	u	3.41802	3.21271	4.29407	3.41501
MSTRG.10562.1	MSTRG.10562	-	chr4	117984744	117989260	x	1.28414	2.45122	2.09493	2.1233
MSTRG.10562.2	MSTRG.10562	-	chr4	117984744	117989152	u	2.25872	1.23393	1.53792	1.78469
MSTRG.10562.3	MSTRG.10562	-	chr4	117984745	117989614	x	6.60659	4.8156	5.86616	5.5336
MSTRG.10567.2	Alms1	+	chr4	118158057	118226005	j	2.96205	2.64121	2.61897	2.92061
MSTRG.10569.1	MSTRG.10569	+	chr4	118319991	118327406	x	1.68044	1.51342	1.5703	0.91326
MSTRG.1057.1	Ilk	+	chr1	160087081	160095140	k	6.13859	5.60167	6.29818	7.87771
MSTRG.10571.1	MSTRG.10571	-	chr4	118326099	118332425	u	1.80414	1.92219	1.2953	1.03572
MSTRG.10573.1	Tprkb	+	chr4	118342919	118357906	k	3.28305	2.5388	2.35096	2.41459
MSTRG.10573.2	Tprkb	+	chr4	118342993	118357906	k	5.14635	2.83679	6.03897	4.58574
MSTRG.10573.3	Tprkb	+	chr4	118342998	118357906	j	1.035	1.53752	1.06225	1.37124
MSTRG.10573.4	Tprkb	+	chr4	118348229	118357906	n	1.45688	1.66089	1.2606	1.17799
MSTRG.10574.1	Nat8b	-	chr4	118359451	118363567	j	3.07494	3.48411	3.38233	3.08405
MSTRG.10575.1	Dusp11	-	chr4	118365990	118385182	m	2.24773	1.80597	1.8842	1.72311
MSTRG.10575.2	Dusp11	-	chr4	118365990	118385182	j	2.05972	4.02984	0.696466	0.000234804
MSTRG.10575.3	Dusp11	-	chr4	118366080	118385182	j	6.14432	3.53255	6.77458	8.48238
MSTRG.10576.1	Tgfa	+	chr4	118618050	118700892	j	2.5719	1.84417	1.34731	2.0249
MSTRG.10579.1	Pcyox1	-	chr4	118830538	118842313	j	13.6893	9.12331	10.4456	6.19238
MSTRG.10579.2	Pcyox1	-	chr4	118830629	118842977	j	11.8618	14.0847	15.9954	15.3055
MSTRG.10581.1	MSTRG.10581	.	chr4	118972703	118974377	u	171.026	161.791	182.538	232.343
MSTRG.10582.1	Tia1	+	chr4	118852815	118883236	j	2.68662	1.2455	2.72151	0.746867
MSTRG.10582.2	Tia1	+	chr4	118852820	118883236	j	7.59787	1.65371	1.78941	7.59708
MSTRG.10582.3	Tia1	+	chr4	118852843	118883236	j	0.0440293	7.11731	2.69494	0.00411843
MSTRG.10583.1	MSTRG.10583	+	chr4	118974666	118996645	u	5.43829	6.30773	6.3393	7.57047
MSTRG.10583.2	MSTRG.10583	+	chr4	118974854	118996645	u	3.839	3.80179	1.91902	2.82265
MSTRG.10583.3	MSTRG.10583	+	chr4	118975157	118996645	u	0.612619	1.65454	1.01248	0.741281
MSTRG.10584.1	Mxd1	-	chr4	119095476	119133234	k	4.21804	4.8766	4.40062	3.93702
MSTRG.10588.2	Aak1	+	chr4	119299507	119451827	j	2.27263	2.60067	3.91962	3.5104
MSTRG.10588.4	Aak1	+	chr4	119301197	119451827	j	4.88534	5.56056	3.91569	5.9696
MSTRG.1059.1	Tpp1	-	chr1	160096801	160104548	m	11.2786	10.1288	12.0145	9.08342
MSTRG.10590.1	Gfpt1	+	chr4	119496718	119546470	j	0.00100833	3.96687	3.0004	3.92359
MSTRG.10590.2	Gfpt1	+	chr4	119496724	119546470	j	5.08697	0.379208	0.920351	0.00900602
MSTRG.10591.1	MSTRG.10591	-	chr4	119829007	119834934	u	85.1354	61.1722	17.354	32.4284
MSTRG.10591.2	MSTRG.10591	-	chr4	119829007	119834934	u	2.9683	4.58477	1.98767	1.72071
MSTRG.10591.3	MSTRG.10591	-	chr4	119829007	119834934	u	2.85343	1.08696	0.707216	1.83179
MSTRG.10591.4	MSTRG.10591	-	chr4	119829009	119834934	u	7.9367	0.37069	0.723709	3.72562
MSTRG.10592.1	Antxr1	-	chr4	119588435	119778580	j	14.4456	23.7211	14.8114	24.1995
MSTRG.10592.2	Antxr1	-	chr4	119588444	119778580	j	22.5138	22.4877	28.3665	40.0491
MSTRG.10597.2	Aplf	-	chr4	120070492	120122608	n	1.93661	1.57335	1.24618	1.69516
MSTRG.10597.3	Aplf	-	chr4	120070492	120122608	j	4.27404	6.28321	6.31611	4.76569
MSTRG.10597.4	Aplf	-	chr4	120070492	120080778	j	1.56098	1.75206	1.77269	1.15583
MSTRG.10598.1	MSTRG.10598	-	chr4	120187704	120188817	x	0.38206	1.31547	0.678414	1.91214
MSTRG.10599.2	Efcc1	+	chr4	120188554	120221121	j	3.82451	3.58076	3.97861	3.12124
MSTRG.106.1	Rnf146	+	chr1	28458124	28475761	j	2.09308	2.99448	1.77532	2.35263
MSTRG.1060.1	Dchs1	-	chr1	160104931	160139101	k	1.46788	3.44792	4.341	4.73199
MSTRG.10600.1	Rab43	-	chr4	120246465	120269310	j	1.8415	2.70953	2.46552	2.70561
MSTRG.10600.2	Isy1	-	chr4	120246466	120297306	j	6.71244	6.96544	8.15233	9.17919
MSTRG.10600.4	Isy1	-	chr4	120276133	120297306	j	4.86371	3.90532	3.24288	3.78439
MSTRG.10600.6	Isy1	-	chr4	120288689	120297306	j	7.89205	6.84491	5.17045	8.38764
MSTRG.10601.1	Cnbp	-	chr4	120302450	120311645	j	4.3674	3.59066	4.4814	3.07298
MSTRG.10601.2	Cnbp	-	chr4	120302450	120311645	j	8.83758	7.06764	6.49445	5.61793
MSTRG.10601.3	Cnbp	-	chr4	120302767	120311645	j	46.8802	46.5888	41.4724	32.6523
MSTRG.10603.1	MSTRG.10603	.	chr4	120440520	120441719	u	71.9523	82.7559	63.7105	114.242
MSTRG.10604.1	Hmces	+	chr4	120392863	120415616	k	7.08641	4.12396	7.32462	7.22471
MSTRG.10607.1	MSTRG.10607	.	chr4	120705847	120706448	u	2.68603	3.83495	3.9575	3.60904
MSTRG.10608.1	Gata2	+	chr4	120648167	120667761	j	3.85115	3.53206	3.08358	2.2528
MSTRG.10609.1	MSTRG.10609	-	chr4	120648167	120658297	u	1.63989	1.27524	1.09074	0.805345
MSTRG.10609.2	MSTRG.10609	-	chr4	120648243	120658297	u	2.15675	2.10729	1.30153	1.54871
MSTRG.1061.1	MSTRG.1061	.	chr1	160266696	160267198	u	2.79526	2.23569	4.08474	3.92926
MSTRG.10610.2	Eefsec	-	chr4	120720159	120915779	j	7.41278	7.85544	9.40607	7.93062
MSTRG.10612.1	MSTRG.10612	.	chr4	120933789	120934239	i	50.572	47.3268	49.356	52.2611
MSTRG.10614.1	MSTRG.10614	-	chr4	121012769	121088453	u	1.49848	2.36717	2.53573	0.0772175
MSTRG.10615.1	Mgll	+	chr4	121192173	121294187	j	4.1791	4.62193	4.57382	4.27294
MSTRG.10616.1	Abtb1	-	chr4	121298611	121305799	j	2.29208	1.56733	2.45476	1.90194
MSTRG.10616.2	Abtb1	-	chr4	121299310	121305799	m	2.44708	3.51606	2.84202	2.05359
MSTRG.10618.2	Mcm2	-	chr4	121346467	121360891	j	1.03394	0.715787	0.421061	1.79325
MSTRG.10619.1	Tpra1	+	chr4	121364069	121375275	j	2.762	4.11476	3.9967	4.7018
MSTRG.10621.1	MSTRG.10621	-	chr4	121737950	121782986	u	5.38284	7.63771	6.93162	10.4581
MSTRG.10623.1	MSTRG.10623	.	chr4	122143552	122143804	i	1.25026	3.62778	2.28649	7.42762
MSTRG.10625.1	MSTRG.10625	+	chr4	122882365	122914373	u	6.81219	8.36681	7.71278	6.39393
MSTRG.10626.1	MSTRG.10626	-	chr4	122914862	122918252	u	1.58971	1.57559	1.30396	1.87457
MSTRG.10626.2	MSTRG.10626	-	chr4	122914862	122920544	u	3.35596	0.864033	2.92738	0.202654
MSTRG.10627.1	Klf15	+	chr4	122965467	122978403	j	9.45294	8.63492	11.2535	4.91721
MSTRG.10629.1	Slc41a3	+	chr4	123109544	123154766	j	2.95098	1.35888e-05	1.17654	6.2681e-06
MSTRG.10629.2	Slc41a3	+	chr4	123112741	123154766	j	3.18026	4.86143	5.94933	7.91794
MSTRG.10630.1	MSTRG.10630	-	chr4	123168719	123242538	u	14.2243	13.5818	17.0963	14.1104
MSTRG.10630.2	MSTRG.10630	-	chr4	123168719	123222228	u	6.51268	6.10206	8.22848	7.12056
MSTRG.10630.3	MSTRG.10630	-	chr4	123168719	123488542	u	3.88219	3.46788	2.09559	2.0219
MSTRG.10630.4	MSTRG.10630	-	chr4	123168721	123270725	u	3.33595	3.58343	3.23079	3.59864
MSTRG.10633.1	MSTRG.10633	+	chr4	123704442	123763857	u	15.5102	19.9545	21.1177	46.097
MSTRG.10633.2	MSTRG.10633	+	chr4	123704442	123763857	u	3.71051	9.52315	12.3429	25.6407
MSTRG.10633.3	MSTRG.10633	+	chr4	123710597	123763857	u	2.25135	0.00139783	2.19228	0.000329222
MSTRG.10637.1	Slc6a6	+	chr4	124195215	124268184	j	1.70402	1.75344	2.95578	3.43673
MSTRG.10637.2	Slc6a6	+	chr4	124195347	124268184	j	2.79883	0.00134753	0.0793163	2.46873
MSTRG.10637.4	Slc6a6	+	chr4	124259557	124268184	n	7.48671	5.25733	7.37782	5.1607
MSTRG.10638.1	MSTRG.10638	.	chr4	124268342	124268854	u	33.9786	35.6309	37.8793	33.0512
MSTRG.1064.1	Cyb5r2	-	chr1	161655590	161664566	j	2.59299	2.27158	2.27772	0.954968
MSTRG.10642.2	Fgd5	+	chr4	124497076	124594564	j	11.077	16.2365	18.6106	14.915
MSTRG.10644.2	Prickle2	-	chr4	124869695	125044409	j	2.25656	2.08127	3.22711	1.41307
MSTRG.10645.2	Nr2c2	+	chr4	124608964	124668301	j	2.98561	1.32139	3.98995	3.2838
MSTRG.10645.4	Nr2c2	+	chr4	124636406	124668301	m	0.775533	2.07417	1.76313	2.56049
MSTRG.10646.1	Mrps25	-	chr4	124668320	124688469	k	2.01352	2.19286	2.34383	2.34204
MSTRG.10647.1	Adamts9	-	chr4	125290639	125462956	n	1.62263	1.60751	1.98514	2.7263
MSTRG.10648.1	MSTRG.10648	+	chr4	125684198	125767249	u	2.20436	1.97587	2.19867	1.21361
MSTRG.10649.1	Magi1	-	chr4	126205570	126811335	j	1.12399	1.31089	1.65757	2.24427
MSTRG.10649.2	Magi1	-	chr4	126205705	126811335	j	5.70223	3.94443	2.71825	2.9452
MSTRG.1065.4	Ppfibp2	+	chr1	161573405	161653916	j	0.88929	2.39982	1.89229	0.487163
MSTRG.1065.5	Ppfibp2	+	chr1	161573432	161650637	j	3.78052	3.04642	2.60318	1.56673
MSTRG.10650.1	Slc25a26	+	chr4	127036742	127130303	j	3.22299	4.27228	3.29129	3.16156
MSTRG.10651.1	MSTRG.10651	-	chr4	127130160	127231460	x	7.38404	5.70613	6.35215	6.47471
MSTRG.10653.1	MSTRG.10653	.	chr4	128741343	128741810	u	2.76756	4.13976	2.60383	3.59084
MSTRG.10655.1	Eogt	-	chr4	129718920	129756310	m	3.29476	4.04969	3.9302	4.77146
MSTRG.10655.2	Eogt	-	chr4	129718988	129756148	n	5.018	3.9146	4.07396	3.25434
MSTRG.10656.1	Tmf1	-	chr4	129759952	129785713	j	8.27067	7.45366	7.15346	9.47374
MSTRG.10657.1	MSTRG.10657	-	chr4	129843798	129858243	u	14.4343	10.6904	10.4426	0.112317
MSTRG.10658.1	Uba3	-	chr4	129789206	129810862	j	3.10833	1.40874	3.93238	2.38628
MSTRG.10659.1	Arl6ip5	+	chr4	129810674	129838621	k	25.0717	19.9734	20.0388	30.543
MSTRG.1066.1	MSTRG.1066	.	chr1	161678311	161681373	u	3.61169	4.70999	3.81452	4.85217
MSTRG.10660.1	MSTRG.10660	-	chr4	129895697	129921583	u	1.96862	0.966487	0.488103	1.19148
MSTRG.10660.2	MSTRG.10660	-	chr4	129895698	130054951	u	1.70326	2.83164	3.82206	1.84432
MSTRG.10660.3	MSTRG.10660	-	chr4	129896169	129921583	u	3.14772	3.6945	1.78355	3.83267
MSTRG.10666.1	Foxp1	-	chr4	131557423	131663233	j	5.63226	5.78153	5.25056	7.38744
MSTRG.10666.2	Foxp1	-	chr4	131557612	132156924	j	2.78114	2.85779	2.90828	2.35291
MSTRG.10666.3	Foxp1	-	chr4	131565498	132157807	k	1.44013	2.08192	1.12072	1.89882
MSTRG.10668.1	Rybp	-	chr4	132876361	132928335	j	9.00937	9.19352	8.78894	8.89154
MSTRG.10669.1	MSTRG.10669	.	chr4	133064845	133070023	u	4.01211	3.46357	0.729465	0.865838
MSTRG.10672.1	MSTRG.10672	+	chr4	133347482	133436540	u	3.33103	5.00288	6.87909	16.2732
MSTRG.10672.2	MSTRG.10672	+	chr4	133347499	133436540	u	0.000151488	1.02012	1.00655	2.31064
MSTRG.10673.1	MSTRG.10673	-	chr4	133430618	133436325	u	4.68166	4.09586	7.08001	5.34482
MSTRG.10674.1	Ppp4r2	+	chr4	133454533	133495486	j	13.4827	0.678082	7.85683	17.8072
MSTRG.10676.1	MSTRG.10676	+	chr4	133956989	133959368	i	2.55215	2.11077	1.69915	1.24134
MSTRG.10677.1	MSTRG.10677	.	chr4	137094282	137094525	u	3.02513	4.39128	2.75571	2.98874
MSTRG.10678.1	MSTRG.10678	+	chr4	136291571	136505821	u	3.70365	3.33192	2.95772	1.88827
MSTRG.10679.1	Lrrn1	+	chr4	140476776	140516407	k	0.406837	1.77071	1.31808	0.310502
MSTRG.10681.1	Trnt1	+	chr4	139689941	139700563	j	4.87045	5.48058	4.87621	4.03911
MSTRG.10681.3	Trnt1	+	chr4	139699318	139703610	n	8.05943	9.63553	9.9301	6.91771
MSTRG.10685.1	Arl8b	+	chr4	141748646	141793264	j	1.68647	1.03544	0.396989	0.818865
MSTRG.10686.1	MSTRG.10686	.	chr4	141992575	141992861	u	16.127	8.10209	13.611	13.27
MSTRG.10689.1	MSTRG.10689	.	chr4	144511249	144511586	i	11.5771	18.7633	25.5232	27.7457
MSTRG.10690.1	Itpr1	+	chr4	141187418	141510492	j	1.55033	0.9948	5.30828	1.56084
MSTRG.10690.5	Itpr1	+	chr4	141187421	141510492	j	3.91607	2.65337	0.483607	2.14597
MSTRG.10693.1	MSTRG.10693	.	chr4	145835283	145838407	p	6.33187	6.24821	7.25939	7.74305
MSTRG.10695.1	Rad18	-	chr4	145735721	145821065	j	2.31297	2.53662	2.19603	2.3614
MSTRG.10696.1	MSTRG.10696	-	chr4	146160584	146166531	u	0	3.41773	0	0
MSTRG.10697.1	Srgap3	-	chr4	145838852	146070514	m	1.56971	1.73336	2.36495	2.51703
MSTRG.10698.2	Thumpd3	+	chr4	146185453	146210421	m	0.830185	1.84584	1.89783	1.55173
MSTRG.107.1	MSTRG.107	.	chr1	28917942	28918450	u	48.2984	54.0423	56.4868	68.2379
MSTRG.1070.1	Lmo1	-	chr1	163132338	163146703	j	1.31628	2.06197	0.945011	4.66559
MSTRG.10700.1	Setd5	+	chr4	146217030	146294894	j	1.33896	0.56515	1.50639	0.973082
MSTRG.10700.2	Setd5	+	chr4	146217180	146294894	j	2.02438	3.33677	2.47978	3.93339
MSTRG.10700.3	Setd5	+	chr4	146217180	146294894	j	12.6073	12.6923	12.4426	13.1633
MSTRG.10702.2	Brpf1	+	chr4	146456276	146472780	j	7.15082	7.1582	6.41995	6.29883
MSTRG.10703.2	Mtmr14	+	chr4	146386963	146429990	m	1.70083	2.42984	2.3392	1.57823
MSTRG.10703.3	Mtmr14	+	chr4	146386978	146429990	j	1.74331	1.13108	1.93394	1.29404
MSTRG.10704.1	Ogg1	+	chr4	146474718	146481204	m	1.75841	1.95262	0.989084	2.02818
MSTRG.10705.2	Camk1	-	chr4	146481222	146492017	j	4.22093	6.26745	4.69807	3.84483
MSTRG.10706.2	Tada3	-	chr4	146510269	146521878	j	7.17901	9.27179	6.52816	11.7653
MSTRG.10709.1	Rpusd3	-	chr4	146553266	146562794	j	1.0402	0.993346	2.14955	2.16116
MSTRG.10709.3	Rpusd3	-	chr4	146558565	146562794	j	4.86003	4.23586	5.872	5.50068
MSTRG.1071.2	Rpl27a	+	chr1	163540151	163542771	j	12.4663	12.7689	16.8698	18.287
MSTRG.10713.2	Il17rc	+	chr4	146619039	146631882	j	2.66869	4.07766	1.66875	8.30865
MSTRG.10713.3	Creld1	+	chr4	146622142	146641491	m	5.48424	6.71055	6.57265	4.99474
MSTRG.10713.5	Il17rc	+	chr4	146622208	146631882	j	0.697969	0.582298	0.42655	1.76775
MSTRG.1072.1	MSTRG.1072	-	chr1	163541212	163542051	i	3.00291	3.54631	3.0558	3.95509
MSTRG.10720.1	Tatdn2	+	chr4	146844852	146865671	j	2.73065	2.47272	2.36254	2.56343
MSTRG.10722.1	MSTRG.10722	.	chr4	147708606	147709069	u	0	2.50033	4.36937	0
MSTRG.10723.1	MSTRG.10723	-	chr4	147699725	147708402	u	1.97458	1.87293	4.02345	0
MSTRG.10723.2	MSTRG.10723	-	chr4	147699725	147708402	u	2.42922	2.113	2.31295	0
MSTRG.10724.1	Atg7	+	chr4	147718747	147924905	k	6.40074	1.9717	6.54393	6.733
MSTRG.10725.1	Vgll4	-	chr4	147927700	148038519	j	15.0339	13.9932	8.51489	9.07062
MSTRG.10725.2	Vgll4	-	chr4	147927700	148037598	j	15.661	12.2299	11.757	15.2572
MSTRG.10728.1	MSTRG.10728	.	chr4	148270544	148271173	i	0.459755	0.864547	1.56931	0.556449
MSTRG.10729.1	Timp4	-	chr4	148300771	148312645	j	2.52599	1.65887	2.62624	0.675083
MSTRG.10729.2	Timp4	-	chr4	148300771	148312645	j	1.45785	1.34778	1.78275	0.80975
MSTRG.1073.1	MSTRG.1073	-	chr1	163830104	163899510	u	3.37392	3.20941	2.58322	5.56722
MSTRG.10730.1	Pparg	+	chr4	148422967	148548468	j	1.03709	1.54534	2.46639	0.565844
MSTRG.10732.1	MSTRG.10732	-	chr4	148644503	148652678	u	4.2088	2.8278	2.1193	1.40741
MSTRG.10735.1	Tmem40	-	chr4	148791521	148819578	j	3.27306	4.35619	1.93634	2.16468
MSTRG.10738.1	MSTRG.10738	-	chr4	148893050	148904828	u	3.54137	5.07054	4.57365	3.85316
MSTRG.10740.2	Plxnd1	-	chr4	149002791	149043153	n	59.3027	83.7684	83.3347	67.7644
MSTRG.10740.3	Plxnd1	-	chr4	149002791	149043153	n	1.78068	2.81758	2.17868	1.83239
MSTRG.10741.1	MSTRG.10741	-	chr4	149069176	149239622	u	4.33793	4.8336	4.45686	4.09854
MSTRG.10741.2	MSTRG.10741	-	chr4	149069278	149124137	u	3.64321	4.66428	7.25214	3.33162
MSTRG.10744.1	Marchf8	+	chr4	149416071	149530770	j	8.13683	8.46013	8.70869	7.15713
MSTRG.10744.2	Marchf8	+	chr4	149416071	149530770	m	4.14642	3.64156	4.13458	7.06664
MSTRG.10745.1	MSTRG.10745	.	chr4	149746280	149746666	u	3.102	4.8953	2.66044	7.49437
MSTRG.10746.1	Alox5	-	chr4	149531347	149578723	j	0.741195	0.180109	1.00069	1.88731
MSTRG.10747.1	Zfp422	-	chr4	149885806	149890376	j	0.688236	0.341198	1.25156	1.60346
MSTRG.10748.1	Rassf4	-	chr4	149897417	149932479	j	13.2579	13.0103	11.6632	8.93647
MSTRG.10749.1	Depp1	+	chr4	149910923	149913010	j	4.91215	12.1911	8.58075	2.7282
MSTRG.1075.1	Dennd2b	-	chr1	163544075	163639017	j	15.605	12.3198	12.5252	8.80596
MSTRG.1075.2	Dennd2b	-	chr1	163544075	163694668	j	2.37987	5.28612	6.81564	6.06275
MSTRG.1075.4	Dennd2b	-	chr1	163544079	163694668	j	1.18001	0.748225	0.489065	2.71219
MSTRG.10750.1	MSTRG.10750	+	chr4	150773315	150780945	u	4.89359	2.36629	3.92589	2.3349
MSTRG.10752.1	MSTRG.10752	.	chr4	150927404	150928012	u	36.7526	35.9303	27.5237	36.7501
MSTRG.10753.1	MSTRG.10753	.	chr4	150928361	150929124	u	1.61943	2.22096	1.60524	1.63828
MSTRG.10754.1	MSTRG.10754	+	chr4	151029448	151039431	u	2.92487	2.44942	3.14431	2.86286
MSTRG.10755.1	Zfp637	+	chr4	151005215	151010076	j	5.47476	7.912	7.11872	5.98886
MSTRG.10755.2	Zfp637	+	chr4	151005248	151010076	j	1.54348	1.95872	2.01212	2.30985
MSTRG.10755.3	Zfp637	+	chr4	151005325	151010076	j	1.78382	3.35862	2.68005	3.01959
MSTRG.10756.1	Hnrnpf	+	chr4	151083056	151107916	j	5.00618	7.48688	9.54526	13.3613
MSTRG.10757.1	MSTRG.10757	-	chr4	151277445	151309460	y	0.55189	0.52956	3.07174	0.550544
MSTRG.10758.1	Csgalnact2	-	chr4	151277637	151308839	j	3.76261	3.68541	3.36851	4.92768
MSTRG.1076.1	Akip1	+	chr1	163734769	163743648	j	2.26086	2.63111	2.21507	0.898928
MSTRG.1076.2	Akip1	+	chr1	163734774	163743648	j	2.09369	2.09805	1.33683	2.55167
MSTRG.1076.3	Akip1	+	chr1	163734795	163743648	j	2.69275	2.23428	2.6828	2.92519
MSTRG.1076.4	Akip1	+	chr1	163734795	163743648	j	0.926492	0.733597	0.851921	1.16925
MSTRG.10762.1	MSTRG.10762	-	chr4	151670735	151706770	u	1.68716	1.66292	1.5014	1.99404
MSTRG.10763.1	Adipor2	-	chr4	152523142	152559397	k	27.5084	23.0596	28.8402	19.5532
MSTRG.10764.2	Wnt5b	-	chr4	152609590	152733459	j	3.67634	2.70233	3.92536	2.00788
MSTRG.10766.1	Cacna1c	-	chr4	151758880	151802145	n	2.27698	2.89258	2.88767	2.74032
MSTRG.10767.1	MSTRG.10767	+	chr4	152358407	152395858	x	6.89931	6.34804	7.12097	7.03539
MSTRG.10767.2	MSTRG.10767	+	chr4	152358420	152395858	x	1.75543	2.2681	2.25948	1.8692
MSTRG.10768.1	Erc1	-	chr4	152763666	153055682	j	3.97106	5.67692	4.77507	6.75902
MSTRG.10768.2	Erc1	-	chr4	152763682	153055682	j	1.98209	1.3334	1.1034	1.31528
MSTRG.10768.3	Erc1	-	chr4	152763716	153055682	j	0.0713105	0.0044417	2.09356	0.000915019
MSTRG.10769.1	MSTRG.10769	+	chr4	153055657	153064143	u	2.96484	5.81357	5.14587	3.0938
MSTRG.10770.1	Ninj2	+	chr4	153306289	153411360	k	1.08035	1.69729	1.10923	1.46472
MSTRG.10772.2	Rad52	+	chr4	153106122	153131475	m	0.860134	1.07491	1.41448	1.02674
MSTRG.10772.3	Rad52	+	chr4	153106143	153128292	m	1.41489	2.0024	1.16864	1.06674
MSTRG.10772.5	Rad52	+	chr4	153106143	153128292	j	0.774981	1.24206	0.466326	6.50441e-07
MSTRG.10773.1	Wnk1	-	chr4	153128334	153254748	j	1.9292	2.4267	2.36267	0.714499
MSTRG.10773.2	Wnk1	-	chr4	153128334	153254748	j	1.02565	1.71892	1.32338	0.736835
MSTRG.10777.1	Hdhd5	-	chr4	153719033	153753269	j	2.00445	0.986952	2.47588	2.98655
MSTRG.10779.2	Bcl2l13	+	chr4	154056146	154112878	j	5.41585	5.9668	5.70299	4.6208
MSTRG.10780.1	Bid	-	chr4	154113064	154134698	j	3.32874	3.06622	3.40479	3.14158
MSTRG.10784.1	Mical3	-	chr4	154152783	154189580	j	5.52788	7.56461	4.56057	3.9692
MSTRG.10784.2	Mical3	-	chr4	154152790	154333173	j	5.30082	5.31492	9.28727	7.2464
MSTRG.10784.4	Mical3	-	chr4	154152790	154333173	j	3.58265	4.20632	4.80067	3.02587
MSTRG.10784.5	Mical3	-	chr4	154152790	154333173	j	2.43571	2.32997	2.03315	1.87674
MSTRG.10784.7	Mical3	-	chr4	154152798	154333173	j	1.42349	0.718294	0.000741099	1.68341e-07
MSTRG.10784.9	Mical3	-	chr4	154153121	154333173	j	0.000655066	1.90988	2.44672	1.04891
MSTRG.10786.1	M6pr	+	chr4	155500762	155510219	j	5.69535	5.44655	5.7221	4.9485
MSTRG.10787.2	Phc1	-	chr4	155510286	155532798	j	2.51842	0.666257	5.13397	3.8776
MSTRG.10787.3	Phc1	-	chr4	155510286	155532798	j	1.30205	3.30233	1.72935	0.900809
MSTRG.10787.4	Phc1	-	chr4	155510330	155532798	j	1.72675	0.905856	0.765914	1.41188
MSTRG.10788.2	MSTRG.10788	-	chr4	155664509	155707367	u	1.20643	2.08232	1.25211	0.525093
MSTRG.10788.3	MSTRG.10788	-	chr4	155664509	155707367	u	1.22712	1.3128	1.48967	0.693116
MSTRG.10788.4	MSTRG.10788	-	chr4	155664509	155707367	u	2.53394	3.04205	2.86806	2.36634
MSTRG.10789.1	MSTRG.10789	.	chr4	155750902	155754159	p	3.19542	3.99843	3.62115	4.87174
MSTRG.1079.1	MSTRG.1079	.	chr1	163764427	163764974	p	14.7618	12.4383	15.3999	12.1158
MSTRG.10790.2	Mfap5	+	chr4	155735153	155750679	j	1.99081	2.75716	2.26332	2.96047
MSTRG.10790.3	Mfap5	+	chr4	155735396	155750679	j	0.834496	0.899243	3.28839	3.80891
MSTRG.10790.4	Mfap5	+	chr4	155735440	155750679	j	14.8032	18.3917	23.0043	50.6983
MSTRG.10791.1	Apobec1	-	chr4	155797248	155827525	j	1.50213	1.2177	1.30942	1.86605
MSTRG.10794.1	Slc2a3	-	chr4	155960917	155970315	n	4.12963	4.23639	4.18892	3.97453
MSTRG.10796.1	C3ar1	-	chr4	156075486	156084600	j	0.729193	0.785961	0.952397	2.84073
MSTRG.10799.2	Clec4a3	+	chr4	156214678	156224804	j	0.979461	0.773966	4.50069	6.14965
MSTRG.108.1	Echdc1	-	chr1	28476352	28507126	j	13.5297	13.0721	12.4822	11.5355
MSTRG.108.2	Echdc1	-	chr1	28476360	28507126	j	2.43926	1.41916	0.31957	0.325007
MSTRG.1080.1	Tmem9b	-	chr1	163765274	163783249	j	15.6449	12.4771	15.794	14.6727
MSTRG.10803.1	Phb2	+	chr4	157517609	157522267	j	7.36264	11.6477	11.1231	9.59182
MSTRG.10804.1	C1s	-	chr4	157058997	157442255	j	7.05473	3.21332	11.033	27.1323
MSTRG.10805.1	MSTRG.10805	+	chr4	157059071	157430671	x	18.7337	23.7482	52.2809	8.73956e-11
MSTRG.10808.2	Pex5	-	chr4	157270677	157296431	j	2.09599	2.03774	2.18131	2.32261
MSTRG.10810.1	C1rl	+	chr4	157394203	157409347	j	3.8859	2.67057	4.08953	6.30473
MSTRG.10812.1	Ptpn6	-	chr4	157526034	157538971	j	6.51367	4.28118	5.663	10.2959
MSTRG.10812.2	Ptpn6	-	chr4	157526034	157554286	j	1.45743	1.3761	1.22485	1.16088
MSTRG.10815.2	Spsb2	+	chr4	157612976	157615288	j	2.48545	2.10103	1.66253	2.17965
MSTRG.10815.3	Spsb2	+	chr4	157613635	157615288	j	0.000408709	2.47585	0.761926	1.45288
MSTRG.10817.1	Usp5	-	chr4	157619648	157634711	j	19.4069	19.1781	17.3569	24.6273
MSTRG.10818.2	Cdca3	+	chr4	157635423	157638796	j	11.2211	10.7436	4.04284	20.1944
MSTRG.10820.1	Cd4	-	chr4	157668879	157695317	j	5.36502	6.34481	11.5003	18.2562
MSTRG.10820.2	Cd4	-	chr4	157668893	157678019	j	6.19091e-05	0.452622	1.66231	0.87826
MSTRG.10821.1	P3h3	-	chr4	157646242	157666668	k	1.40201	0.0140429	0.687916	1.97892
MSTRG.10821.3	P3h3	-	chr4	157646242	157661834	j	12.4965	12.6775	10.0321	15.1217
MSTRG.10821.4	P3h3	-	chr4	157646242	157666668	k	2.0138	6.3344	5.04373	6.91091
MSTRG.10821.6	P3h3	-	chr4	157646242	157661834	j	3.55693	3.2449	11.7851	29.5513
MSTRG.10822.1	MSTRG.10822	+	chr4	157663148	157664166	x	2.07363	4.6582	1.27816	4.81999
MSTRG.10823.1	Ptms	-	chr4	157722384	157726809	j	116.407	23.148	1.44025e-05	136.722
MSTRG.10824.1	Mlf2	+	chr4	157739635	157744325	j	112.697	94.0731	104.624	121.265
MSTRG.10824.2	Mlf2	+	chr4	157739647	157744325	j	11.5496	10.7509	9.12684	13.1026
MSTRG.10825.1	Cops7a	-	chr4	157766626	157773993	j	16.5073	16.9226	16.2085	18.841
MSTRG.10826.2	Pianp	+	chr4	157796459	157804842	k	3.36474e-05	1.62347e-05	1.0962	1.01037
MSTRG.10826.3	Pianp	+	chr4	157796467	157804842	j	1.34719	2.6623	0.737307	1.80297
MSTRG.10827.1	Zfp384	+	chr4	157810280	157841430	j	4.80009	2.0151	1.9261	1.84899
MSTRG.10827.2	Zfp384	+	chr4	157810280	157841430	j	0.0293043	3.12291	0.00153204	2.38157
MSTRG.10827.4	Zfp384	+	chr4	157810286	157841430	j	2.31946	0.24727	3.14057	1.5733
MSTRG.10827.7	Zfp384	+	chr4	157810893	157841430	n	1.85524	1.36772	0.242189	1.67299
MSTRG.10827.8	Zfp384	+	chr4	157810902	157841430	j	1.23107	1.79541	3.83947	1.82002
MSTRG.10828.1	MSTRG.10828	-	chr4	157829766	157832108	i	1.38564	1.11254	1.00953	1.18476
MSTRG.10829.1	Ing4	+	chr4	157841943	157856686	j	2.28292	2.24626	2.29657	2.29379
MSTRG.10830.1	Iffo1	+	chr4	157945092	157962302	j	11.8583	10.6624	10.3654	7.29953
MSTRG.10830.2	Iffo1	+	chr4	157945092	157962302	j	4.87437	2.9964	1.78345	3.20811
MSTRG.10830.3	Iffo1	+	chr4	157945092	157962302	j	6.55204	5.40367	2.89672	7.52616
MSTRG.10830.4	Iffo1	+	chr4	157945099	157962302	m	0.0502697	7.04717	5.41128	10.5263
MSTRG.10830.5	Iffo1	+	chr4	157945099	157962302	j	2.97087	6.85885	7.45087	6.85792
MSTRG.10830.7	Iffo1	+	chr4	157945117	157962302	j	4.98055	7.03151	5.50404	4.43695
MSTRG.10830.8	Iffo1	+	chr4	157945117	157962302	j	2.82519	0.442634	0.227343	0.38031
MSTRG.10831.1	Gapdh	-	chr4	157962356	157967195	j	6.43398	2.59654	3.01707	3.0564
MSTRG.10832.1	Vamp1	+	chr4	158012663	158020536	m	4.82545	4.9209	4.22252	4.02996
MSTRG.10833.1	MSTRG.10833	-	chr4	157968869	157991895	x	4.18861	4.83733	3.42764	7.68944
MSTRG.10834.1	Mrpl51	+	chr4	157991756	157995562	j	8.58067	6.9307	7.84859	7.418
MSTRG.10837.1	MSTRG.10837	+	chr4	157898376	157932730	u	11.9988	12.8062	8.95554	11.4614
MSTRG.10837.2	MSTRG.10837	+	chr4	157898509	157932730	u	3.05161	2.94387	1.53896	3.46041
MSTRG.10837.4	Nop2	+	chr4	157898532	157944462	k	7.68109	8.56963	5.92075	8.56208
MSTRG.10837.5	Nop2	+	chr4	157898532	157944462	j	4.12919	3.13843	3.58992	4.08097
MSTRG.10837.6	Nop2	+	chr4	157898532	157944462	k	3.83303	2.5261	4.47599	4.38126
MSTRG.10837.7	MSTRG.10837	+	chr4	157898563	157932730	u	0.000858255	0.047444	4.96118	7.20897e-05
MSTRG.10838.1	Ltbr	-	chr4	158108886	158116770	j	2.75834	5.46933	2.8738	4.71474
MSTRG.10838.2	Ltbr	-	chr4	158108886	158122958	k	2.05179	1.77424	2.18512	1.47053
MSTRG.10842.1	MSTRG.10842	-	chr4	158163346	158182207	x	6.02621	5.4068	3.81638	4.62071
MSTRG.10844.1	MSTRG.10844	-	chr4	159354722	159357565	y	1.87487	1.64161	2.40032	0.523409
MSTRG.10846.2	Kcna1	-	chr4	159464236	159474493	k	5.9486	6.63963	3.26664	3.12776
MSTRG.10847.1	Ndufa9	-	chr4	159659248	159688013	j	1.58148	1.92679	3.68034	0.84057
MSTRG.10848.2	Rad51ap1	-	chr4	159759684	159772524	j	2.21688	0.883913	0.207118	0.675151
MSTRG.10850.1	MSTRG.10850	+	chr4	159962362	159966533	u	56.69	56.0022	54.4667	55.8196
MSTRG.10851.1	Tigar	-	chr4	159926966	159946060	j	2.70741	1.99695	3.50299	1.77598
MSTRG.10853.1	MSTRG.10853	+	chr4	160304871	160344367	u	2.2034	2.60277	2.15118	2.08296
MSTRG.10854.1	MSTRG.10854	-	chr4	160519136	160521641	u	1.99297	1.3523	0.734745	2.00894
MSTRG.10855.1	Tspan11	+	chr4	160737905	160805527	j	2.82452	2.27237	2.86255	3.91577
MSTRG.10855.2	Tspan11	+	chr4	160737951	160805527	j	0.652401	0.730432	1.7338	3.60159
MSTRG.10856.1	Tspan9	-	chr4	160813879	160995555	j	6.58583	10.2262	11.1953	12.3292
MSTRG.10856.3	Tspan9	-	chr4	160813929	160995555	j	1.99	6.12192	4.5515	2.82448
MSTRG.10856.4	Tspan9	-	chr4	160813929	160977593	j	1.35477	2.29518	4.3312	3.27972
MSTRG.10856.5	Tspan9	-	chr4	160813929	160977593	j	1.20505	1.24328	1.04343	1.30838
MSTRG.10856.6	Tspan9	-	chr4	160813931	160995555	j	33.2241	33.6172	31.9771	28.6044
MSTRG.10856.8	Tspan9	-	chr4	160813932	160995555	j	1.92204	0.00504188	0.54808	3.5407
MSTRG.10857.1	MSTRG.10857	-	chr4	161590512	161632160	u	15.2452	16.0425	16.6366	18.6566
MSTRG.10858.1	MSTRG.10858	-	chr4	161474378	161571925	u	2.04972	1.90506	3.10486	1.1734
MSTRG.10858.2	MSTRG.10858	-	chr4	161494121	161573050	u	2.07399	2.54664	3.21125	1.61514
MSTRG.10859.1	MSTRG.10859	+	chr4	161494121	161498090	u	2.8334	2.51667	1.30194	1.38591
MSTRG.10859.2	MSTRG.10859	+	chr4	161494292	161497250	u	0.00631059	0.732923	2.90199	0.000100169
MSTRG.10860.1	MSTRG.10860	+	chr4	161674653	161684160	u	2.84217	3.13658	3.01009	3.30509
MSTRG.10861.3	Rhno1	-	chr4	161634060	161639371	j	2.68366	0.456725	1.575	1.29808
MSTRG.10862.1	Foxm1	+	chr4	161639265	161654226	j	3.05678	2.40379	1.22718	3.59992
MSTRG.10863.1	Itfg2	-	chr4	161684950	161698280	j	6.31664	6.82803	5.56691	5.45732
MSTRG.10866.1	MSTRG.10866	-	chr4	161815085	161857323	u	256.892	0.208687	0.00734289	0
MSTRG.10867.1	MSTRG.10867	.	chr4	162006074	162006551	u	0	43.6297	25.9116	26.2033
MSTRG.10868.1	MSTRG.10868	.	chr4	162214054	162214263	u	0	0	10.4601	0
MSTRG.10869.1	LOC689770	-	chr4	162147506	162166430	k	0.991201	1.23042	0.130582	2.93519
MSTRG.1087.1	Wee1	+	chr1	164170779	164193603	k	1.53213	1.1068	1.17922	0.985296
MSTRG.10871.1	MSTRG.10871	.	chr4	162233414	162234592	i	0.258886	0.104374	0.35355	4.1689
MSTRG.10872.1	Clec2dl1	+	chr4	162263306	162274880	k	1.60517	1.2171	1.316	1.85888
MSTRG.10873.2	MSTRG.10873	+	chr4	162280181	162342238	u	2.17658	2.34452	3.13306	2.04399
MSTRG.10874.1	Clec2g	+	chr4	162617859	162626167	j	6.38448	7.4963	7.63049	7.38096
MSTRG.10874.2	Clec2g	+	chr4	162617867	162620408	j	6.9065	4.17541	4.95349	3.07096
MSTRG.10875.1	MSTRG.10875	.	chr4	162626659	162627617	p	656.278	528.14	602.002	381.32
MSTRG.10876.1	MSTRG.10876	-	chr4	162661503	162674975	u	4.08903	3.37567	2.13192	3.19531
MSTRG.10876.2	MSTRG.10876	-	chr4	162669496	162674975	u	24.1885	19.1188	16.6793	10.0298
MSTRG.10877.2	Clec12a	+	chr4	162798166	162816757	m	0.962315	0.914981	1.0584	2.22347
MSTRG.10878.1	MSTRG.10878	.	chr4	162804471	162805355	i	20.6717	16.7822	18.2054	25.4666
MSTRG.10879.2	Clec7a	-	chr4	162902896	162913894	j	0.811475	0.509344	1.10021	0.969641
MSTRG.10882.1	MSTRG.10882	-	chr4	162969382	162980187	u	1.57193	2.88922	2.10649	0.577972
MSTRG.10884.1	MSTRG.10884	-	chr4	163514593	163532029	u	0.73092	0.997014	2.23609	4.1569
MSTRG.10885.1	MSTRG.10885	-	chr4	163619315	163643027	u	0.652923	0.581908	1.54461	2.23418
MSTRG.10886.1	MSTRG.10886	.	chr4	164948979	164949681	p	2.61057	1.29959	2.48071	1.78444
MSTRG.10889.1	MSTRG.10889	-	chr4	165047642	165063827	u	7.41008	6.22376	3.3418	1.13985
MSTRG.10889.2	MSTRG.10889	-	chr4	165047652	165063827	u	0.0234428	0.000148132	4.47669e-05	2.43395
MSTRG.10890.1	Ybx3	-	chr4	165129757	165153069	j	248.607	282.31	348.524	348.696
MSTRG.10891.1	MSTRG.10891	.	chr4	166342251	166344678	u	47.1375	48.3639	53.5178	44.8063
MSTRG.10892.1	Etv6	+	chr4	166848705	167088433	m	1.03251	1.24637	1.14872	0.745449
MSTRG.10892.2	Etv6	+	chr4	166849031	167088433	j	0.00377822	0.0197404	3.82252	0.00781683
MSTRG.10893.2	Bcl2l14	+	chr4	167234746	167259542	j	2.94921	1.77981	1.32535	1.15353
MSTRG.10894.1	Lrp6	-	chr4	167266103	167400785	j	13.1106	14.7557	18.8053	16.3239
MSTRG.10895.1	Mansc1	-	chr4	167438246	167458523	k	8.37564	6.10469	6.67659	6.54815
MSTRG.10897.1	MSTRG.10897	.	chr4	167504008	167504227	i	25.2333	0	2.53492	19.3406
MSTRG.10898.1	Dusp16	-	chr4	167546539	167629928	k	2.70735	3.95101	4.09141	3.7903
MSTRG.10898.2	Dusp16	-	chr4	167546539	167628854	k	4.12543	3.35423	1.1876	0.929127
MSTRG.10899.1	MSTRG.10899	+	chr4	167629933	167646475	u	2.08238	2.13753	2.0952	1.34952
MSTRG.1090.1	Sbf2	-	chr1	164352895	164719865	j	7.71035	8.53052	9.14045	9.26982
MSTRG.10900.1	Crebl2	+	chr4	167673351	167699292	j	1.67715	1.84709	3.61003	5.24555
MSTRG.10901.2	Gpr19	-	chr4	167711038	167737409	j	2.56605	1.89331	1.04841	2.18332
MSTRG.10902.1	Cdkn1b	+	chr4	167759628	167765157	m	15.3094	12.267	11.3883	12.4254
MSTRG.10903.1	MSTRG.10903	+	chr4	167768845	167791811	u	2.84758	2.3019	1.35955	3.11474
MSTRG.10907.1	Hebp1	-	chr4	167974328	168003854	j	17.8301	13.0082	14.4492	19.7892
MSTRG.10909.5	Emp1	+	chr4	168200342	168233039	j	0.00863495	7.81436	11.0279	11.6806
MSTRG.10909.6	Emp1	+	chr4	168200342	168233039	j	59.1789	61.3408	51.3516	113.269
MSTRG.1091.3	Ampd3	+	chr1	164891097	164929887	j	2.42655	1.11224	3.69822	1.35194
MSTRG.10912.1	MSTRG.10912	.	chr4	169671947	169672748	u	7.84249	1.82914	3.88341	2.15926
MSTRG.10914.1	Wbp11	-	chr4	169680983	169694476	j	4.18254	1.03952	2.18698	3.01242
MSTRG.10915.1	MSTRG.10915	.	chr4	169709531	169709777	u	9.91604	13.7056	3.87601	11.204
MSTRG.10917.1	MSTRG.10917	-	chr4	169721603	169728154	i	2.31904	4.43699	3.01828	2.31487
MSTRG.10918.2	Mgp	-	chr4	169766340	169769663	j	4.13191	4.76502	5.23667	4.75585
MSTRG.10919.3	Arhgdib	-	chr4	169822951	169841016	j	10.4865	6.99947	4.26362	4.21474
MSTRG.10919.4	Arhgdib	-	chr4	169822951	169841850	j	5.81243	5.68854	5.5579	6.99095
MSTRG.10919.5	Arhgdib	-	chr4	169822951	169841850	k	7.85116	3.10486	4.89569	2.81876
MSTRG.1092.1	rnf141	-	chr1	164931062	164957127	m	1.85516	2.16014	1.93132	1.86441
MSTRG.1092.3	rnf141	-	chr1	164931078	164947409	j	17.3064	15.7327	14.3299	12.0549
MSTRG.10920.1	MSTRG.10920	-	chr4	169981673	170089772	u	6.01657	8.49168	5.06824	7.76915
MSTRG.10921.2	Ptpro	+	chr4	170322700	170374771	j	0.775686	1.47215	1.19607	2.48793
MSTRG.10922.1	Eps8	-	chr4	170388373	170560377	j	10.4103	10.2056	8.23224	12.1612
MSTRG.10922.3	Eps8	-	chr4	170388385	170560377	j	0.000282353	0.000294826	2.99086	0.000173673
MSTRG.10924.1	MSTRG.10924	+	chr4	170663693	170742469	u	27.8635	24.229	26.7658	32.907
MSTRG.10924.2	MSTRG.10924	+	chr4	170663693	170675716	u	6.42864	8.49946	6.83122	5.36029
MSTRG.10924.3	MSTRG.10924	+	chr4	170663707	170742469	u	1.93167	3.92106	1.38589	3.40298
MSTRG.10927.1	Plekha5	+	chr4	173333540	173503545	j	8.06969	7.7969	4.66448	7.45006
MSTRG.10927.2	Plekha5	+	chr4	173333540	173503545	n	4.448	4.1445	2.92957	2.3464
MSTRG.10927.3	Plekha5	+	chr4	173333687	173503545	j	1.43751	3.27287	4.77937	3.6751
MSTRG.10927.5	Plekha5	+	chr4	173333810	173503545	j	2.21112	2.08764	2.13423	2.52853
MSTRG.10927.6	Plekha5	+	chr4	173333874	173503545	j	1.55455	0.972385	0.999825	0.925651
MSTRG.10928.2	Aebp2	+	chr4	173528571	173566033	j	8.94824	8.95859	8.38739	8.52871
MSTRG.10931.2	Pyroxd1	+	chr4	175303509	175308416	n	0.872887	1.46133	0.538783	0.572811
MSTRG.10932.1	Recql	-	chr4	175308323	175332936	j	2.39966	1.91082	2.04016	1.92998
MSTRG.10932.2	Recql	-	chr4	175308340	175332936	n	15.5556	13.3098	13.4283	15.291
MSTRG.10933.1	Golt1b	+	chr4	175333086	175346155	j	1.46568	1.34167	1.07131	0.728326
MSTRG.10935.2	Kcnj8	-	chr4	175508909	175515868	j	1.62862	2.72671	2.34822	2.03741
MSTRG.10935.3	Kcnj8	-	chr4	175508910	175515868	j	3.29553	6.05788	5.83667	3.36087
MSTRG.10937.2	Abcc9	-	chr4	175531725	175655596	j	1.90785	2.0825	2.57034	0.299169
MSTRG.10937.3	Abcc9	-	chr4	175531855	175655874	j	7.22105	11.5638	10.9851	6.1219
MSTRG.10938.2	C2cd5	-	chr4	175969594	176055558	j	5.5682	6.44221	5.33832	5.21129
MSTRG.10939.1	MSTRG.10939	+	chr4	175970851	175973962	x	1.93397	0.743893	0.250196	0.443531
MSTRG.1094.1	Irag1	-	chr1	164981709	165094241	j	0.32386	7.53283e-05	1.75975	1.58548
MSTRG.1094.2	Irag1	-	chr1	164981709	165094241	j	1.3968	1.44959	2.57134	1.12491
MSTRG.1094.3	Irag1	-	chr1	164981716	165094241	j	2.21079	4.17099	3.85217	2.14296
MSTRG.1094.4	Irag1	-	chr1	164981716	165094241	j	1.9533	1.83395	2.51452	1.49003
MSTRG.10940.1	Etnk1	+	chr4	176126173	176170329	m	20.207	20.6427	20.7922	17.6509
MSTRG.10942.1	MSTRG.10942	.	chr4	177336069	177336656	u	3.83789	2.1456	2.45477	4.17919
MSTRG.10943.1	Bcat1	-	chr4	177964834	178046570	j	5.9186	13.6137	11.368	51.3503
MSTRG.10943.2	Bcat1	-	chr4	177964834	178046570	j	2.49631	0.692419	2.57465e-05	0.885908
MSTRG.10944.1	MSTRG.10944	+	chr4	178089366	178143502	x	0.834023	0.802236	2.05769	1.72315
MSTRG.10944.2	MSTRG.10944	+	chr4	178089459	178143502	x	6.86114e-06	4.31405e-05	8.98886e-06	2.68793
MSTRG.10944.3	MSTRG.10944	+	chr4	178089525	178143502	x	3.14185	2.75544	2.58889	0.721341
MSTRG.10945.1	Cfap94	-	chr4	178143499	178179792	n	3.2741	2.42888	2.77816	2.2261
MSTRG.10946.1	MSTRG.10946	+	chr4	178180117	178185249	u	14.2639	11.5663	13.9194	8.78904
MSTRG.10947.1	Kras	-	chr4	178185421	178218783	k	11.9296	11.1936	10.847	11.7025
MSTRG.10948.1	Rassf8	+	chr4	178716191	178798047	j	2.08233	2.79522	1.20628	7.67958
MSTRG.10948.2	Rassf8	+	chr4	178716191	178798047	k	1.15479	3.16606	2.7102	2.96796
MSTRG.10949.1	MSTRG.10949	-	chr4	178834298	178838639	u	6.91991	3.79091	6.64033	8.31707
MSTRG.10951.1	Itpr2	-	chr4	179015208	179404230	k	2.19474	2.73193	3.41887	3.06431
MSTRG.10952.1	Tm7sf3	-	chr4	179516912	179550272	j	6.70891	6.87218	6.93145	7.32833
MSTRG.10954.1	Ints13	-	chr4	179459772	179491472	j	5.87944	6.02863	4.46245	9.49846
MSTRG.10954.2	Ints13	-	chr4	179459772	179491472	j	2.2076	3.62545	4.00728	1.14306
MSTRG.10955.2	Fgfr1op2	+	chr4	179491657	179512630	j	13.2645	8.21424	6.16588	3.42823
MSTRG.10955.3	Fgfr1op2	+	chr4	179491660	179512630	j	5.3781	6.1845	5.12722	4.42259
MSTRG.10956.1	Stk38l	+	chr4	179634275	179693174	j	9.20191	6.05454	6.34454	6.15705
MSTRG.10959.1	Klhl42	+	chr4	180004457	180030250	j	2.06081	2.31968	1.7433	1.25577
MSTRG.10959.2	Klhl42	+	chr4	180004580	180030250	k	3.6009	3.91852	4.63725	3.88734
MSTRG.1096.1	MSTRG.1096	.	chr1	165377653	165378481	u	0.89639	1.6299	1.2525	1.57334
MSTRG.10960.1	Rep15	+	chr4	179808452	179953008	k	0.669448	1.79447	1.68292	2.33463
MSTRG.10960.2	Rep15	+	chr4	179808770	179953008	k	1.35246	0.747053	0.843616	1.03092
MSTRG.10960.6	Ppfibp1	+	chr4	179808815	179951934	j	11.7251	15.3736	16.0879	16.6278
MSTRG.10960.7	Ppfibp1	+	chr4	179808815	179951934	j	7.00451	6.47394	9.9668	11.4836
MSTRG.10960.9	Ppfibp1	+	chr4	179909206	179951934	j	10.112	15.896	13.8905	8.49736
MSTRG.10964.2	Ergic2	-	chr4	181090550	181122801	j	15.2012	11.7842	12.6087	12.9623
MSTRG.10965.1	MSTRG.10965	-	chr4	181142942	181359402	x	5.59137	7.53112	6.68552	7.38858
MSTRG.10968.1	MSTRG.10968	-	chr4	181728866	181793122	u	4.59972	4.16459	4.37936	4.24318
MSTRG.10968.2	MSTRG.10968	-	chr4	181728866	181793122	u	2.41121	3.19005	3.34507	3.0861
MSTRG.10969.1	MSTRG.10969	-	chr4	181806591	181860450	u	2.5849	3.6166	3.15114	2.97243
MSTRG.1097.1	MSTRG.1097	+	chr1	165275034	165281034	u	2.76659	3.52443	4.39401	2.49074
MSTRG.1097.2	MSTRG.1097	+	chr1	165275034	165281034	u	4.78248	6.86477	4.49963	7.03321
MSTRG.10970.1	MSTRG.10970	-	chr4	181956010	182092160	u	0.7851	1.30857	1.22471	0.835858
MSTRG.10970.2	MSTRG.10970	-	chr4	181956706	182092160	u	2.5045	2.66346	2.79343	1.73165
MSTRG.10971.1	Etfbkmt	+	chr4	182140526	182148396	n	2.29429	1.86803	1.54279	1.4183
MSTRG.10972.2	Amn1	-	chr4	182170613	182182193	j	2.82531	2.62624	2.59479	1.73354
MSTRG.10973.1	MSTRG.10973	+	chr4	182335438	182361983	u	4.03739	4.39193	6.91284	4.91034
MSTRG.10973.3	MSTRG.10973	+	chr4	182335502	182361983	u	2.12987	3.89486	4.15499	2.43092
MSTRG.10975.1	MSTRG.10975	.	chr4	182555848	182557492	i	1.37392	1.59272	1.31588	1.02312
MSTRG.10976.1	MSTRG.10976	.	chr5	231087	231328	u	30.0594	13.7816	14.4005	21.8735
MSTRG.10977.1	MSTRG.10977	.	chr5	233212	233462	u	1.30224	1.25966	0	0
MSTRG.10978.1	MSTRG.10978	.	chr5	393617	393883	u	35.5926	23.2316	0	0
MSTRG.10979.1	MSTRG.10979	-	chr5	522439	528458	u	1.49838	1.49002	0.449786	0.695095
MSTRG.1098.1	MSTRG.1098	.	chr1	165383424	165383628	u	4.62396	0	0	4.56156
MSTRG.10980.1	MSTRG.10980	.	chr5	1449642	1452818	u	0.978265	1.11778	1.37463	1.31697
MSTRG.10981.1	MSTRG.10981	+	chr5	1390815	1393941	u	8.935	11.1565	14.9491	13.405
MSTRG.10982.1	Pi15	-	chr5	1390833	1423355	j	4.28847	5.90971	5.13608	10.7951
MSTRG.10983.1	Jph1	+	chr5	2030237	2122915	j	6.77852	3.29078	6.76939	0.000115584
MSTRG.10983.2	Jph1	+	chr5	2030259	2122915	j	4.1409	4.3978	4.27137	0.501319
MSTRG.10984.2	Ly96	-	chr5	2582153	2654729	k	5.35914e-06	0.857831	1.56773	1.03681
MSTRG.10984.3	Ly96	-	chr5	2582218	2612520	j	5.3285	2.40879	2.33273	2.59127
MSTRG.10986.1	MSTRG.10986	+	chr5	2690851	2754393	u	3.95698	4.31949	4.10109	3.95187
MSTRG.10987.1	Rdh10	-	chr5	3186694	3193583	n	2.71064	2.98489	1.90153	2.70058
MSTRG.10988.1	Stau2	+	chr5	2840794	3084855	j	1.21273	3.03683	2.05378	1.33906
MSTRG.1099.2	Eif4g2	-	chr1	165181113	165240940	j	0.439296	1.20447	1.4645	1.56253
MSTRG.1099.3	Eif4g2	-	chr1	165181433	165194762	j	11.246	9.55312	8.39014	11.255
MSTRG.10990.1	MSTRG.10990	.	chr5	4272839	4273100	u	3.15527	6.0994	0.965187	1.04358
MSTRG.10992.1	MSTRG.10992	+	chr5	3402744	3443051	u	14.4444	12.1527	8.69355	5.97128
MSTRG.10992.2	MSTRG.10992	+	chr5	3402747	3443051	u	1.17418	0.905205	0.686375	0.563225
MSTRG.10995.1	MSTRG.10995	+	chr5	4955205	5101483	u	2.2004	2.68609	4.16917	3.00389
MSTRG.10995.2	MSTRG.10995	+	chr5	4960842	5101483	u	1.68422	3.68645	3.03205	1.89432
MSTRG.10995.3	MSTRG.10995	+	chr5	4960846	5101483	u	0.705913	0.426242	1.35348	1.53169
MSTRG.10995.4	MSTRG.10995	+	chr5	4960851	5101483	u	1.50436	2.47675	1.75717	1.32991
MSTRG.10997.1	Tram1	+	chr5	5642449	5667671	j	3.82242	3.11551	4.84554	8.39313
MSTRG.10998.1	MSTRG.10998	.	chr5	6175841	6176170	u	1.25255	0.398635	1.55442	1.25059
MSTRG.10999.1	Ncoa2	+	chr5	5835405	6069686	k	6.88465	7.62391	6.91726	6.43519
MSTRG.11.1	Lrp11	+	chr1	2048266	2108115	j	4.93289	5.60699	5.13432	3.92755
MSTRG.11.3	MSTRG.11	+	chr1	2059915	2061605	u	1.41989	2.24076	1.69419e-05	1.67271
MSTRG.11.4	Lrp11	+	chr1	2077760	2108115	n	1.57148	1.8233	2.04696	2.03639
MSTRG.11001.1	MSTRG.11001	.	chr5	7897157	7897488	u	0	0	0	9.8059
MSTRG.11002.1	Sulf1	-	chr5	6362896	6498826	j	19.7192	24.0462	34.7226	30.2941
MSTRG.11002.2	Sulf1	-	chr5	6362897	6498429	j	1.31026	0.00634467	1.35685	2.73765
MSTRG.11002.3	Sulf1	-	chr5	6362897	6498826	j	0.556568	2.56729	2.15439	0.00421085
MSTRG.11003.1	Prex2	-	chr5	7937696	8252931	j	2.86475	4.14077	4.32332	2.82336
MSTRG.11005.2	Cspp1	-	chr5	9077162	9126922	j	2.23083	2.10863	1.95044	1.71091
MSTRG.11005.3	Cspp1	-	chr5	9077164	9190268	m	2.26335	1.0493	3.55289	2.06918
MSTRG.11005.5	Cspp1	-	chr5	9077172	9192254	n	1.78194	2.88783	1.18068	2.40062
MSTRG.11007.1	MSTRG.11007	.	chr5	9499208	9499531	u	1.33285	0.849368	0.826469	0
MSTRG.11009.1	MSTRG.11009	+	chr5	9296131	9298224	x	18.5239	19.3785	23.3584	21.0335
MSTRG.11009.2	MSTRG.11009	+	chr5	9296148	9298224	x	2.97322	2.95409	6.54312	3.60201
MSTRG.1101.2	Usp47	+	chr1	166152351	166235312	j	2.2142	1.29049	3.62471	7.3702e-05
MSTRG.1101.3	Usp47	+	chr1	166152369	166235312	j	5.45694	5.65294	5.42023	9.67537
MSTRG.11011.1	Sgk3	-	chr5	9345487	9472256	j	3.32767	2.43728	3.25299	2.66714
MSTRG.11013.2	Adhfe1	-	chr5	9706082	9732521	j	2.59115	0.170703	0.722471	0.187346
MSTRG.11014.1	MSTRG.11014	.	chr5	12463357	12463558	u	15.5625	40.4986	37.4264	15.3617
MSTRG.11015.1	Pcmtd1	-	chr5	12284711	12354846	j	5.75764	6.70074	5.24424	2.82591
MSTRG.11015.4	Pcmtd1	-	chr5	12284711	12354846	j	0.697261	1.35604	1.13644	0.657346
MSTRG.11017.1	Atp6v1h	-	chr5	14379035	14473208	j	15.1496	14.268	13.3513	12.7285
MSTRG.11018.2	Tcea1	-	chr5	14631504	14668704	j	2.7057	3.63363	5.08406	3.48044
MSTRG.1102.3	Dkk3	-	chr1	166239878	166280620	j	24.4149	31.3422	20.1028	48.028
MSTRG.11020.2	Mrpl15	+	chr5	14729996	14741276	j	12.122	9.86394	11.1149	7.76473
MSTRG.11021.1	MSTRG.11021	.	chr5	15099320	15100271	u	0.835164	0.462091	1.54697	0.797015
MSTRG.11024.1	MSTRG.11024	.	chr5	15375697	15376114	u	0.635263	0	0	8.89938
MSTRG.11025.1	Sox17	+	chr5	15015569	15022228	j	0.94736	1.08268	0.775282	1.26084
MSTRG.11025.3	Sox17	+	chr5	15016713	15022228	n	2.91786	2.30174	3.91836	2.23824
MSTRG.11025.7	Sox17	+	chr5	15016750	15022228	j	0.309838	2.85496	4.00798	1.43856
MSTRG.11025.8	Sox17	+	chr5	15016750	15022228	j	0.609627	1.49027	0.664339	0.0638576
MSTRG.11026.1	MSTRG.11026	.	chr5	16293144	16297483	u	1.64018	0.799132	0.703444	0.466708
MSTRG.11027.2	Tmem68	-	chr5	16494287	16524841	j	4.79557	4.57107	4.76702	5.21519
MSTRG.11030.1	MSTRG.11030	.	chr5	16755677	16757692	p	2.22511	1.27437	2.02151	2.10712
MSTRG.11032.1	MSTRG.11032	+	chr5	16957171	16961643	u	18.7334	16.4507	15.005	17.2976
MSTRG.11033.1	Penk	-	chr5	17183800	17189149	j	8.73541	13.1227	10.374	27.3292
MSTRG.11034.1	MSTRG.11034	-	chr5	17689000	17731557	u	1.41921	1.53168	1.78001	2.37861
MSTRG.11036.1	MSTRG.11036	.	chr5	18469461	18470611	u	2.21252	3.73205	2.88038	2.63385
MSTRG.11037.1	Fam110b	+	chr5	18789354	18930020	k	3.06763	2.44867	3.64838	6.41742
MSTRG.11037.2	Fam110b	+	chr5	18789354	18930020	k	0.000112196	0.391564	1.10113	1.13931
MSTRG.11037.3	Fam110b	+	chr5	18789387	18930020	k	1.51997	1.10055	1.54569e-05	1.9619e-09
MSTRG.11038.1	MSTRG.11038	.	chr5	19038500	19038726	u	11.4837	4.45552	14.5626	4.52794
MSTRG.1104.1	Mical2	+	chr1	166345876	166471678	k	2.27115	2.40405	3.29894	4.25899
MSTRG.1104.2	Mical2	+	chr1	166345882	166471678	j	1.511	1.09876	1.13432	2.31116
MSTRG.11040.1	Sdcbp	+	chr5	19489955	19517192	m	86.719	81.7299	78.4486	84.8557
MSTRG.11040.2	Sdcbp	+	chr5	19489955	19517192	j	23.8	19.9231	22.2046	12.1992
MSTRG.11040.3	Sdcbp	+	chr5	19489967	19517192	j	0.218345	2.50167	3.25247	3.1529
MSTRG.11041.1	MSTRG.11041	.	chr5	21098546	21099196	u	14.5303	22.3338	19.2353	20.02
MSTRG.11043.1	Nsmaf	-	chr5	19517805	19531488	n	1.0725	1.33002	1.00782	0.951727
MSTRG.11043.2	Nsmaf	-	chr5	19517805	19525387	j	10.2153	10.5817	10.8664	9.94102
MSTRG.11045.2	Chd7	+	chr5	21812070	21995358	j	1.9521	1.46074	1.68444	1.16617
MSTRG.11047.1	Asph	-	chr5	22604118	22813893	j	7.99947	8.59119	8.44704	11.2483
MSTRG.11047.2	Asph	-	chr5	22723822	22813893	j	11.2928	10.8726	7.07712	8.11178
MSTRG.11047.4	Asph	-	chr5	22760447	22813893	j	4.72912	1.07872	1.68151	0.743376
MSTRG.11047.6	Asph	-	chr5	22760448	22784608	j	2.70633	2.54403	7.10513	2.99414e-06
MSTRG.11048.1	MSTRG.11048	+	chr5	22801807	22804433	u	1.29248	1.13473	1.4813	0.874349
MSTRG.11049.2	MGC94199	+	chr5	23996736	24015607	m	1.79506	2.03119	1.55711	2.13028
MSTRG.11049.3	MGC94199	+	chr5	24008666	24015607	j	3.17397	8.00932	2.55421	1.29629
MSTRG.11050.1	MSTRG.11050	.	chr5	24122891	24123296	u	2.27851	2.15352	2.13486	2.05121
MSTRG.11052.2	Ndufaf6	-	chr5	24147753	24171951	j	2.80272e-05	3.40969	1.54143e-05	1.23739
MSTRG.11053.1	Tp53inp1	+	chr5	24253865	24272204	k	1.23257	1.73848	0.888401	0.52448
MSTRG.11054.2	Ccne2	+	chr5	24286134	24297648	m	1.92047	1.88659	2.04065	1.94963
MSTRG.11055.1	MSTRG.11055	-	chr5	24295679	24344624	x	1.88374	2.38231	1.44552	1.49465
MSTRG.11055.2	MSTRG.11055	-	chr5	24296955	24344624	x	4.6001	4.71801	4.83219	5.05067
MSTRG.11055.3	MSTRG.11055	-	chr5	24297349	24318405	x	1.48973	2.04181	2.00646	0.849098
MSTRG.11056.1	Dpy19l4	-	chr5	24350663	24410912	j	2.90215	2.13706	2.03301	1.86148
MSTRG.11056.2	Dpy19l4	-	chr5	24350689	24410774	j	1.07681	1.72066	2.09165	2.43259
MSTRG.11057.1	Esrp1	-	chr5	24427612	24482101	j	6.70012	6.54952	2.99628	3.80608
MSTRG.11057.2	Esrp1	-	chr5	24427612	24482101	j	3.9923	1.13858	1.75633	1.48036
MSTRG.11057.3	Esrp1	-	chr5	24427612	24482101	j	3.38703	0.000132183	0.351342	0.399504
MSTRG.11058.2	Virma	+	chr5	24961211	25027209	j	4.22662	4.97888	4.68505	5.45255
MSTRG.11059.1	MSTRG.11059	.	chr5	25155356	25163070	u	2.03664	2.75266	1.98715	2.14176
MSTRG.1106.1	MSTRG.1106	-	chr1	166704601	166737884	u	130.005	75.1658	125.939	110.563
MSTRG.1106.2	MSTRG.1106	-	chr1	166704617	166723840	u	4.30617e-05	24.1055	3.19777e-05	2.66452e-05
MSTRG.11063.1	MSTRG.11063	+	chr5	25590502	25597130	u	1.40435	1.66002	1.41449	1.18241
MSTRG.11065.1	MSTRG.11065	-	chr5	25614022	25632406	u	0.86397	1.07319	1.12404	1.59171
MSTRG.11065.2	MSTRG.11065	-	chr5	25614022	25632406	u	0.867111	1.93095	0.000387024	1.63045
MSTRG.11065.3	MSTRG.11065	-	chr5	25614032	25632406	u	8.76146	13.4244	15.4711	16.7937
MSTRG.11065.5	MSTRG.11065	-	chr5	25614065	25632406	u	4.40708	1.00866e-13	3.51287e-06	1.78614e-05
MSTRG.11067.2	Runx1t1	+	chr5	27187675	27339002	j	1.6279	2.59018	2.54173	2.31266
MSTRG.11068.1	Otud6b	-	chr5	28197453	28214385	j	7.189	5.18668	6.25002	7.42382
MSTRG.11068.2	Otud6b	-	chr5	28197458	28214385	j	3.73555	5.29609	4.3534	3.54587
MSTRG.1107.1	MSTRG.1107	.	chr1	167058169	167064135	u	3.11286	3.551	3.06408	3.00366
MSTRG.11070.1	MSTRG.11070	+	chr5	28698790	28718757	u	2.97384	2.70748	4.46187	2.27344
MSTRG.11071.1	MSTRG.11071	+	chr5	28329983	28356540	u	2.58586	1.96149	3.53495	2.32559
MSTRG.11073.2	Decr1	-	chr5	29411206	29439011	j	1.474	2.43076	1.03405	0.224256
MSTRG.11075.1	MSTRG.11075	-	chr5	29500476	29519314	u	2.91337	3.13291	2.60196	2.37017
MSTRG.11076.1	Ripk2	-	chr5	29630695	29639533	n	1.39159	1.55461	1.25662	0.805044
MSTRG.11079.1	MSTRG.11079	.	chr5	32908706	32908958	i	10.0021	8.46482	4.57297	6.18968
MSTRG.1108.1	MSTRG.1108	.	chr1	167212588	167212931	u	8.75559	1.04231	1.02011	12.7517
MSTRG.11080.1	Cpne3	-	chr5	33014506	33063953	k	18.4964	16.94	15.8394	14.9969
MSTRG.11081.2	Rmdn1	+	chr5	33083333	33098485	n	1.32824	0.921592	1.08943	0.642947
MSTRG.11082.1	Wwp1	-	chr5	33097585	33160375	j	1.72508	0.991378	1.09557	1.53407
MSTRG.11085.1	MSTRG.11085	.	chr5	34750920	34751255	u	1.96704	6.37837	4.76319	1.17851
MSTRG.11087.1	MSTRG.11087	-	chr5	35294655	35304103	u	3.56563	3.53251	2.76719	5.90518
MSTRG.11088.2	Usp45	+	chr5	35318662	35392090	j	2.03928	2.06991	2.37495	2.04071
MSTRG.11089.1	Pnisr	+	chr5	35395962	35424607	m	20.6784	26.5101	21.125	22.6033
MSTRG.1109.3	Tead1	+	chr1	166792357	167010588	j	1.05486	1.14546	5.04198	3.18756
MSTRG.11090.1	Coq3	+	chr5	35429599	35460607	k	7.14204	7.33583	7.68775	6.51924
MSTRG.11091.1	Fbxl4	+	chr5	35955816	36029446	j	4.63109	4.50624	5.47815	4.12334
MSTRG.11092.1	MSTRG.11092	-	chr5	38325641	38355024	u	2.43021	2.85617	2.58891	1.42829
MSTRG.11094.1	Fhl5	-	chr5	38903804	38956113	j	2.65444	4.29532	4.8371	2.80972
MSTRG.11094.2	Fhl5	-	chr5	38903804	38956113	j	2.62443	2.08477	3.77228	0.94584
MSTRG.11095.1	Ufl1	-	chr5	38960914	38995140	j	4.35552	4.15805	4.53876	3.64782
MSTRG.11096.1	MSTRG.11096	.	chr5	39351829	39356221	u	1.66846	2.29704	0.970628	1.0136
MSTRG.11097.1	Manea	-	chr5	40196420	40218533	k	5.80852	6.40625	5.30739	5.58617
MSTRG.11098.1	Map3k7	+	chr5	46357000	46415597	j	1.34112	1.44961	1.08724	1.50834
MSTRG.1110.1	Far1	+	chr1	167644655	167705874	j	9.66855	9.46833	8.59697	10.0681
MSTRG.11100.1	MSTRG.11100	.	chr5	46979213	46982632	p	1.51579	1.63876	0.980177	0.668148
MSTRG.11101.2	Casp8ap2	+	chr5	47020833	47052493	j	1.61495	1.95466	1.5129	2.3614
MSTRG.11103.1	MSTRG.11103	+	chr5	47111182	47189323	u	1.72499	1.69192	2.15439	1.9577
MSTRG.11104.2	Ankrd6	-	chr5	47202367	47343127	j	2.46288	1.0554	1.03276	1.26368
MSTRG.11105.2	Rragd	+	chr5	47373491	47413528	k	5.69956	4.44102	2.76215	1.30959
MSTRG.11106.1	Ube2j1	+	chr5	47421723	47441470	j	4.82629	4.64155	5.09951	7.09024
MSTRG.11108.1	Srsf12	+	chr5	47606461	47631727	j	0.716864	0.937385	0.705626	1.54747
MSTRG.1111.1	Arntl	+	chr1	167331820	167430236	j	8.221	11.9991	11.1392	8.5252
MSTRG.1111.2	Arntl	+	chr1	167331820	167430236	j	1.61329	1.01047	1.83762	1.15185
MSTRG.1111.3	Arntl	+	chr1	167331820	167430236	j	2.88593	1.49962	0.295687	1.73498
MSTRG.11110.2	Rngtt	+	chr5	47723061	47913295	j	0.0034279	2.83757	2.99555	0.000936833
MSTRG.11111.1	MSTRG.11111	+	chr5	48926262	48928627	u	1.41123	0.215775	2.08028	0.323241
MSTRG.11113.1	Orc3	-	chr5	49127090	49181508	j	1.84119	1.89361	1.65153	1.66243
MSTRG.11115.1	Slc35a1	-	chr5	49225597	49248402	j	10.9261	9.29049	8.30229	10.6917
MSTRG.11116.1	Smim8	-	chr5	49336150	49345625	j	1.36495	1.55836	1.59961	1.09126
MSTRG.11118.1	Mob3b	-	chr5	49541808	49738211	m	6.36031	6.56404	4.82191	3.8963
MSTRG.1112.1	Btbd10	-	chr1	167431328	167489161	j	1.02494	1.24716	2.54523	2.10913
MSTRG.1112.2	Btbd10	-	chr1	167431328	167489161	j	2.60513	3.58424	3.89534	3.61335
MSTRG.11122.1	MSTRG.11122	.	chr5	53164836	53165125	u	2.0159	1.94005	4.35091	1.33907
MSTRG.11124.2	Ddx58	-	chr5	55321462	55369942	j	4.74711	5.56208	7.03219	3.94413
MSTRG.11125.1	MSTRG.11125	+	chr5	55369988	55370812	u	1.0701	1.07812	2.46967	2.0082
MSTRG.11127.1	MSTRG.11127	+	chr5	55399650	55400498	x	30.9584	30.9498	29.4718	29.9028
MSTRG.11129.1	B4galt1	-	chr5	55933877	55982500	j	35.5697	25.3763	24.2102	32.6885
MSTRG.11130.2	Aptx	-	chr5	55776054	55817710	j	1.44831	1.47224	0.644942	0.768692
MSTRG.11130.3	Aptx	-	chr5	55797294	55822862	j	3.16723	3.81924	3.33517	2.93129
MSTRG.11130.5	Smu1	-	chr5	55799233	55875321	k	3.6151	3.34143	3.6784	3.51941
MSTRG.11135.2	Nfx1	+	chr5	56105303	56148908	j	7.13857	6.09639	6.99718	4.57131
MSTRG.11138.1	MSTRG.11138	-	chr5	56259920	56270395	u	8.83857	8.66516	9.99062	7.70475
MSTRG.11140.1	MSTRG.11140	.	chr5	56457267	56457678	u	12.5131	16.1758	13.1696	12.2992
MSTRG.11141.1	MSTRG.11141	-	chr5	56460424	56482073	u	9.0465	8.84917	7.67783	8.64475
MSTRG.11142.1	Ubap2	-	chr5	56348243	56436967	n	17.6788	19.9362	17.9488	19.6317
MSTRG.11142.3	Ubap2	-	chr5	56348246	56436967	n	1.80173	1.42554	1.378	1.30154
MSTRG.11145.1	MSTRG.11145	-	chr5	56666175	56668864	u	2.20087	2.50042	1.65208	1.20242
MSTRG.11146.1	Myorg	-	chr5	56646274	56664423	m	3.89624	4.21987	5.73114	3.76673
MSTRG.11147.1	Fam219a	-	chr5	56679076	56729849	n	4.21015	5.298	6.14845	3.83757
MSTRG.11147.2	Fam219a	-	chr5	56679076	56729849	j	5.42288	5.12315	5.21086	5.78035
MSTRG.1115.1	MSTRG.1115	.	chr1	168472344	168472632	u	66.7848	54.4449	66.8033	45.4893
MSTRG.11150.1	Cntfr	-	chr5	56823460	56861069	k	6.33957	11.3685	15.2153	2.87312
MSTRG.11150.2	Cntfr	-	chr5	56823460	56849710	j	3.59183	4.56145	5.94062	9.49314
MSTRG.11151.2	Rpp25l	-	chr5	56877654	56879974	j	2.09271	1.04672	1.04083	1.48202
MSTRG.11154.1	Galt	+	chr5	56927030	56930265	j	2.72038	2.89111	2.06851	3.36323
MSTRG.11154.2	Galt	+	chr5	56927039	56930265	m	4.61452	5.20063	4.66653	4.33193
MSTRG.11156.1	Il11ra1	+	chr5	56932016	56941406	j	16.106	20.2223	17.3837	25.7664
MSTRG.11158.1	MSTRG.11158	.	chr5	56967470	56967706	u	17.7833	12.0557	19.3893	31.5851
MSTRG.1116.2	Copb1	-	chr1	168404380	168438440	j	2.06586	2.82304	2.88587	1.34807
MSTRG.11160.2	Dnajb5	+	chr5	57176847	57186049	j	18.03	16.3613	15.3066	7.44163
MSTRG.11160.3	Dnajb5	+	chr5	57176847	57186049	j	0.925046	1.33291	1.17301	0.990151
MSTRG.11160.4	Dnajb5	+	chr5	57177283	57186049	j	0.707933	2.06476	1.7975	1.06465
MSTRG.11162.1	Stoml2	-	chr5	57244081	57259824	k	1.99755	2.48266	3.82442	1.86655
MSTRG.11162.2	MSTRG.11162	-	chr5	57244144	57253292	u	1.85842	1.2686	0.00114986	1.37955
MSTRG.11163.1	Fam214b	-	chr5	57260839	57274033	j	14.5726	14.0832	14.1572	15.3902
MSTRG.11163.2	Fam214b	-	chr5	57260839	57268870	m	3.60808	4.57134	4.26562	5.48531
MSTRG.11164.1	Unc13b	+	chr5	57288843	57504106	j	1.75099	1.16647	1.2853	1.77672
MSTRG.11164.2	Unc13b	+	chr5	57289009	57504106	j	4.12859	4.02007	3.81406	2.02103
MSTRG.11165.1	MSTRG.11165	+	chr5	57628316	57675521	u	2.6855	5.77942	4.46834	3.71545
MSTRG.11165.2	MSTRG.11165	+	chr5	57628367	57675521	u	2.3466	4.0919	2.85324	3.95543
MSTRG.11165.5	MSTRG.11165	+	chr5	57648892	57675521	u	2.4432	0.598423	1.98686	2.42138
MSTRG.11165.6	MSTRG.11165	+	chr5	57654062	57675521	u	3.8878	3.77311	5.62374	3.84146
MSTRG.11168.1	Ccdc107	+	chr5	57749478	57752920	j	3.95592	4.92652	4.36337	3.52248
MSTRG.11168.2	Ccdc107	+	chr5	57749559	57752920	j	34.9661	27.0644	29.7964	26.1807
MSTRG.11168.3	Ccdc107	+	chr5	57749559	57752920	j	1.76353	2.21337	2.89619	0.88593
MSTRG.11169.2	Arhgef39	-	chr5	57752941	57756079	m	2.82515	3.58843	0.832641	4.02832
MSTRG.11171.2	Tpm2	-	chr5	57771877	57780652	j	2.15625	3.27711	2.41108	1.53368
MSTRG.11171.5	Tpm2	-	chr5	57771877	57780652	j	4.1965	0.000293088	4.89492	1.65959e-08
MSTRG.11171.7	Tpm2	-	chr5	57771884	57780652	j	0.0852957	2.94295	0.0416912	1.9864e-09
MSTRG.11172.3	Tln1	-	chr5	57788013	57818107	j	3.44505	3.31399	1.79277	0.620954
MSTRG.11173.2	Creb3	+	chr5	57818144	57822503	j	19.966	17.7986	17.4999	21.8777
MSTRG.11174.2	Gba2	-	chr5	57822905	57834643	m	2.85426	2.50907	3.39907	2.28874
MSTRG.11175.1	MSTRG.11175	+	chr5	57827700	57829510	i	1.98372	2.10573	2.44546	1.03839
MSTRG.11176.1	MSTRG.11176	+	chr5	57834029	57839138	x	5.87056	7.18285	8.19165	6.17479
MSTRG.11177.1	LOC100365008	-	chr5	57837619	57843086	m	6.18933	7.35576	7.03172	7.87893
MSTRG.11178.1	Npr2	+	chr5	57882428	57901580	j	1.50867	1.21896	1.24522	2.1836
MSTRG.11178.2	Npr2	+	chr5	57882436	57901580	m	7.73402	10.4921	11.2983	9.16513
MSTRG.11178.3	Npr2	+	chr5	57882452	57901580	n	1.23952	3.2592	2.54368	1.33478
MSTRG.11179.3	Spag8	-	chr5	57901682	57907050	k	1.11628	1.09241	1.09422	0.747781
MSTRG.1118.1	Pde3b	+	chr1	168606485	168770733	m	2.48396	2.55924	4.9639	4.37843
MSTRG.11180.1	MSTRG.11180	+	chr5	57982323	57983184	u	87.446	91.1314	102.563	46.0819
MSTRG.11181.1	MSTRG.11181	+	chr5	57919826	57948387	u	4.98377	8.03507	7.00002	5.05219
MSTRG.11182.2	MSTRG.11182	+	chr5	57984726	57988198	u	1.72413	1.59747	3.67252	0.910757
MSTRG.11185.1	MSTRG.11185	+	chr5	58181575	58201043	u	7.40608	9.92077	10.1615	19.4395
MSTRG.11186.1	MSTRG.11186	.	chr5	58201250	58202610	u	27.1934	24.1892	15.4465	29.362
MSTRG.11187.1	Reck	+	chr5	58102921	58169501	j	17.7088	20.2537	24.044	28.7935
MSTRG.11188.1	Clta	+	chr5	58245435	58263482	j	3.27189	2.86339	4.94392	0.211893
MSTRG.11188.2	Clta	+	chr5	58245450	58263482	j	93.8006	97.6535	121.967	137.228
MSTRG.11188.3	Clta	+	chr5	58245450	58263482	m	0.710998	1.58848	0.889694	0.799355
MSTRG.11189.1	Gne	-	chr5	58267211	58307693	j	6.32385	3.42294	1.39573	0.9852
MSTRG.11189.2	Gne	-	chr5	58267211	58297538	j	3.12745	2.17707	1.9389	4.83466
MSTRG.11190.1	Rnf38	-	chr5	58358777	58401394	j	7.99089	6.60459	6.48482	4.79352
MSTRG.11190.2	Rnf38	-	chr5	58358777	58467402	j	0.58968	3.16483	2.33445	1.9693
MSTRG.11191.1	MSTRG.11191	.	chr5	58668329	58670220	u	2.70654	3.29091	2.71337	3.26259
MSTRG.11192.1	Melk	+	chr5	58540413	58600937	j	1.74149	1.74871	0.909768	2.469
MSTRG.11193.2	Zcchc7	+	chr5	59157495	59173308	j	0.972489	1.08806	0.612203	0.963559
MSTRG.11193.3	Zcchc7	+	chr5	59158717	59173308	j	8.36509	9.34651	8.44509	7.90059
MSTRG.11195.2	Zbtb5	-	chr5	59244149	59264791	j	3.32097	2.71779	3.82526	4.24531
MSTRG.11195.3	Zbtb5	-	chr5	59244149	59264462	j	5.7302e-05	2.12382	0.000346616	3.70455e-05
MSTRG.11196.1	Polr1e	+	chr5	59279452	59295359	m	3.0934	2.51893	2.04687	1.96443
MSTRG.11197.1	MSTRG.11197	-	chr5	59297282	59343388	u	2.93805	5.15669	4.20756	6.29176
MSTRG.11198.1	MSTRG.11198	-	chr5	59362367	59365191	u	68.6037	63.8892	69.1885	80.2752
MSTRG.11199.1	Trmt10b	+	chr5	59548881	59572528	j	2.62782	7.40177	7.45002	5.43919
MSTRG.11199.2	Trmt10b	+	chr5	59548882	59572528	j	3.54477	7.31224e-08	4.50232e-08	0.000432912
MSTRG.11200.1	Exosc3	-	chr5	59573997	59579281	j	8.67384	7.52235	8.34457	11.1543
MSTRG.11201.1	Dcaf10	+	chr5	59607715	59647204	j	1.15129	0.968986	0.548823	1.88974
MSTRG.11202.1	Mcart1	-	chr5	59649852	59663521	j	4.63977	5.55152	5.71539	4.86789
MSTRG.11202.2	Mcart1	-	chr5	59649852	59663521	j	7.15648	6.84476	8.50635	7.4604
MSTRG.11203.2	MSTRG.11203	-	chr5	59678085	59787254	u	7.55265	7.35979	6.34415	5.33199
MSTRG.11205.1	Tdrd7	+	chr5	60238539	60312546	j	0.860093	1.01416	0.58813	1.47476
MSTRG.11205.3	Tdrd7	+	chr5	60245840	60312546	j	7.42762	6.80716	7.29171	7.64381
MSTRG.1121.1	MSTRG.1121	-	chr1	170364699	170476546	u	3.8217	4.56826	4.01243	2.90778
MSTRG.1121.2	MSTRG.1121	-	chr1	170364704	170443695	u	1.70101	1.24946	0.81947	0.589201
MSTRG.1121.3	MSTRG.1121	-	chr1	170365530	170547790	u	2.29555	1.50296	0.892231	1.59011
MSTRG.11210.1	Tstd2	-	chr5	60393454	60415730	n	1.02042	2.2812	1.44382	0.463166
MSTRG.11210.3	Tstd2	-	chr5	60394049	60415916	j	0.732562	0.74087	1.14641	1.38616
MSTRG.11210.4	Tstd2	-	chr5	60394929	60405804	j	1.2295	3.01949	2.08192	0.44008
MSTRG.11211.1	Ncbp1	+	chr5	60416015	60448389	m	1.27019	1.89024	1.24836	1.71936
MSTRG.11212.2	Xpa	-	chr5	60448394	60475748	j	3.09461	3.39354	3.69792	2.97844
MSTRG.11213.2	Trim14	-	chr5	60800568	60824862	j	1.86472	1.75189	0.769757	2.46567
MSTRG.11213.3	Trim14	-	chr5	60800621	60824862	j	1.90836	1.72759	1.81408	0.0149025
MSTRG.11214.1	Coro2a	-	chr5	60825641	60882410	j	4.86611	3.80749	1.97078	2.33594
MSTRG.11215.2	Tbc1d2	-	chr5	60884146	60931476	j	4.68569	3.60614	2.41935	3.17538
MSTRG.11218.1	MSTRG.11218	+	chr5	61384578	61418521	u	7.60128	5.92904	3.08531	4.08997
MSTRG.11219.1	MSTRG.11219	+	chr5	61489466	61500649	u	0.892657	1.22969	1.7995	0.777507
MSTRG.11220.2	MSTRG.11220	-	chr5	61608375	61611533	u	1.24164	2.93282	2.93456	3.48581
MSTRG.11221.1	Col15a1	+	chr5	61501521	61607591	j	1.34879	0.729252	0.81761	1.80388
MSTRG.11222.1	Tgfbr1	+	chr5	61653680	61710777	j	1.73725	1.48356	1.37296	1.19723
MSTRG.11226.2	Msantd3	+	chr5	62866326	62892443	j	3.40002	3.84201	4.4663	4.88567
MSTRG.11228.1	MSTRG.11228	.	chr5	63728244	63728575	u	72.8379	87.0927	64.3804	75.9957
MSTRG.11229.2	Erp44	-	chr5	62516278	62610739	j	6.59164	6.03299	6.19572	6.20813
MSTRG.11231.2	Tex10	-	chr5	62762246	62801900	j	3.00501	4.68145e-05	6.6227e-05	1.60157
MSTRG.11234.1	Pgap4	-	chr5	63931928	63946683	k	12.7159	10.559	8.04597	9.8744
MSTRG.11234.2	Pgap4	-	chr5	63931928	63947058	k	1.75571	2.94797	4.12524	2.5167
MSTRG.11235.1	Rnf20	+	chr5	63976098	64001754	j	8.70781	9.62523	9.85377	11.0991
MSTRG.11238.1	MSTRG.11238	.	chr5	68006258	68006623	u	2.41869	3.73082	3.10612	2.11459
MSTRG.11239.1	Abca1	-	chr5	67677877	67801161	k	5.5342	4.88648	9.07112	6.3771
MSTRG.1124.1	Nucb2	+	chr1	170750854	170799819	k	2.43518	1.86358	1.97169	3.3243
MSTRG.1124.2	Nucb2	+	chr1	170750920	170787797	j	12.6631	10.8323	16.1969	19.3048
MSTRG.11240.1	MSTRG.11240	.	chr5	68280439	68281430	u	5.85148	6.81455	10.9056	15.4033
MSTRG.11241.1	Slc44a1	+	chr5	68063238	68197398	j	13.6097	13.0579	11.3633	11.7274
MSTRG.11242.1	MSTRG.11242	+	chr5	68306670	68334918	u	3.11472	3.99877	3.29567	2.86421
MSTRG.11246.1	MSTRG.11246	.	chr5	68810855	68811068	u	3.3799	32.872	12.2071	0
MSTRG.11247.1	MSTRG.11247	.	chr5	69854154	69854685	u	21	16.5772	24.7857	13.5704
MSTRG.11248.1	MSTRG.11248	+	chr5	69671356	69809754	u	2.85355	3.67018	3.3207	2.80167
MSTRG.1125.1	MSTRG.1125	+	chr1	171304588	171306097	u	5.65422	9.74068	6.81778	11.7701
MSTRG.1125.2	MSTRG.1125	+	chr1	171304588	171306097	u	0.000347779	3.53832	1.86858	0.804701
MSTRG.11250.1	Rad23b	+	chr5	70090232	70129427	j	32.37	30.4602	40.3216	36.4842
MSTRG.11250.2	Rad23b	+	chr5	70090232	70129427	j	0.000355275	1.40254	0.000950397	2.24767
MSTRG.11251.1	Klf4	-	chr5	70278862	70283828	j	3.18428	3.89928	4.03492	5.58248
MSTRG.11252.1	Elp1	-	chr5	71453232	71494357	n	4.36568	4.90546	4.08351	4.14996
MSTRG.11253.1	MSTRG.11253	+	chr5	71505830	71514337	u	2.0227	2.52643	2.02528	2.27061
MSTRG.11254.2	Ctnnal1	-	chr5	71514919	71569431	j	30.7081	33.7681	34.0367	27.1406
MSTRG.11255.1	MSTRG.11255	-	chr5	71571026	71647720	y	6.94514	8.06207	7.40673	6.05169
MSTRG.11257.2	Epb41l4b	-	chr5	71765450	71852536	j	14.1672	9.88604	5.27117	4.83775
MSTRG.11257.3	Epb41l4b	-	chr5	71766263	71852536	j	2.72929	3.13867	2.12515	1.99471
MSTRG.11258.1	MSTRG.11258	-	chr5	71908522	72027453	u	0.785445	0.884526	0.870025	1.67301
MSTRG.11258.2	MSTRG.11258	-	chr5	71908522	72027453	u	9.34892	8.1481	5.76532	3.24094
MSTRG.11259.1	MSTRG.11259	-	chr5	72660646	72668334	u	6.87085	3.41812	1.91188	1.76916
MSTRG.1126.1	Xylt1	+	chr1	171643817	171929750	j	0.786777	0.799271	0.929451	1.84647
MSTRG.11261.1	Palm2	+	chr5	72313327	72648524	j	0.884716	1.2807	1.06656	1.71251
MSTRG.11261.3	Akap2	+	chr5	72536988	72648524	j	0.821178	7.42021	6.10877	5.39524
MSTRG.11261.4	Akap2	+	chr5	72537019	72648524	j	0.000475594	3.38567	0.000371586	1.29042
MSTRG.11261.5	Akap2	+	chr5	72574748	72648524	j	3.27744	2.17576e-11	4.24218e-05	5.4146e-12
MSTRG.11261.6	Akap2	+	chr5	72604694	72648524	j	1.76396	1.66184	2.64114	1.01844
MSTRG.11262.2	MSTRG.11262	-	chr5	72811422	72962388	u	2.10896	3.35446	5.21913	3.37724
MSTRG.11264.1	MSTRG.11264	.	chr5	73091281	73091509	i	10.8828	14.7732	25.6441	27.8954
MSTRG.11267.1	Dnajc25	+	chr5	73825212	73849381	j	0.770516	0.632324	0.970119	1.12218
MSTRG.11269.2	MSTRG.11269	-	chr5	73601750	73713330	u	1.50352	1.52874	2.28982	0.77166
MSTRG.11269.4	MSTRG.11269	-	chr5	73603514	73713709	u	9.49223	8.74856	9.80625	8.11802
MSTRG.11269.5	MSTRG.11269	-	chr5	73604590	73713709	u	7.09777	6.63771	10.7056	6.25206
MSTRG.1127.1	Rps15a	-	chr1	172420151	172427011	k	1499.7	1219.56	1670.89	1485.29
MSTRG.1127.3	Rps15a	-	chr1	172420177	172427011	k	39.3969	37.3995	63.256	32.1983
MSTRG.1127.4	Rps15a	-	chr1	172420177	172427011	k	5.80183	7.40424	5.0721	8.07184
MSTRG.11271.1	MSTRG.11271	.	chr5	74240750	74240957	u	29.0111	4.03713	0	4.08657
MSTRG.11272.1	Ptbp3	-	chr5	74313330	74399423	j	8.74474	1.78413	1.72269	1.44277
MSTRG.11272.2	Ptbp3	-	chr5	74313370	74399423	j	0.322374	2.91417	4.04612	2.61088
MSTRG.11272.3	Ptbp3	-	chr5	74313387	74399423	j	9.13932	13.7999	10.4449	12.2584
MSTRG.11273.2	Hsdl2	+	chr5	74443957	74479767	j	4.67316	7.67333	10.8632	6.97971
MSTRG.11274.1	Inip	-	chr5	74647840	74662628	j	2.10248	1.92338	1.94733	1.50564
MSTRG.11276.2	Zfp37	-	chr5	75598742	75638968	j	1.22117	1.98797	3.77025	2.83014
MSTRG.11278.1	MSTRG.11278	-	chr5	75750796	75815101	u	11.438	12.6375	11.2317	14.5011
MSTRG.11280.10	LOC259244	-	chr5	74842342	74912890	j	5.54369	9.65256e-18	3.13514e-57	1.00704e-25
MSTRG.11280.13	Mup4	-	chr5	74842342	74964590	j	1.32945	0.785522	0.0634306	9.6168e-42
MSTRG.11280.14	LOC259244	-	chr5	74842348	74911333	j	109.256	3.34446	16.0542	9.77679
MSTRG.11280.15	Obp3	-	chr5	74842349	74988446	n	99.6411	1.15484	9.03644	3.42049
MSTRG.11280.4	Obp3	-	chr5	74842342	74845757	j	239.713	0.882888	6.60058	0.677908
MSTRG.11280.5	Obp3	-	chr5	74842342	74987988	j	262.592	2.45008	15.0069	6.02653e-05
MSTRG.11280.7	LOC259244	-	chr5	74842342	74912890	j	11.4913	7.99182e-20	7.47434e-45	7.90386e-20
MSTRG.11280.9	LOC259244	-	chr5	74842342	74912890	j	11.4274	1.30182e-24	2.88713e-85	7.89357e-41
MSTRG.11282.1	MSTRG.11282	-	chr5	75394145	75394397	i	32.5067	0	1.14324	0
MSTRG.11283.1	MSTRG.11283	-	chr5	75462861	75470248	i	24.1531	1.07781	0.265575	1.13589
MSTRG.11284.1	MSTRG.11284	-	chr5	75470420	75472553	i	6.71741	0	0.102502	0
MSTRG.11285.1	MSTRG.11285	-	chr5	75498320	75564827	i	14.9083	0	0	0
MSTRG.11286.1	Cdc26	-	chr5	75844786	75859749	j	5.6545	5.99819	6.28979	6.42766
MSTRG.11289.1	Bspry	+	chr5	75927404	75949586	j	3.13029	1.89287	0.71387	2.2648
MSTRG.1129.2	Syt17	-	chr1	172695432	172761576	j	2.39382	0.807425	0.00134018	0.000140887
MSTRG.11294.1	MSTRG.11294	.	chr5	75985972	75986223	i	132.688	183.876	199.409	208.385
MSTRG.11295.2	MSTRG.11295	+	chr5	76503628	76564832	u	2.17911	3.69081	1.78015	2.40341
MSTRG.11296.1	Rgs3	+	chr5	76078477	76121867	j	2.5022	5.80584	9.58282	5.33514
MSTRG.11296.2	Rgs3	+	chr5	76078492	76121867	j	4.35629	2.99334	0.002003	0.000225857
MSTRG.11296.3	Rgs3	+	chr5	76078492	76161895	j	0.844829	1.80365	1.47539	0.587262
MSTRG.11296.5	Rgs3	+	chr5	76132917	76161895	j	3.89334	1.45384	0.888431	1.71532
MSTRG.11296.6	Rgs3	+	chr5	76133068	76161895	j	6.04312	4.61327	1.25368	5.5216
MSTRG.11297.1	Col27a1	+	chr5	76646980	76765984	j	0.560113	1.33259	0.920247	1.57875
MSTRG.11299.1	Whrn	-	chr5	76828188	76911944	j	4.30434	4.76457	3.55859	3.46416
MSTRG.113.2	Pdcd6	+	chr1	28966544	28982185	j	9.24837	8.04895	8.99967	8.3806
MSTRG.11301.1	Tmem268	+	chr5	76975599	77001452	m	0.914596	1.54422	1.4049	1.2587
MSTRG.11302.1	Tnc	-	chr5	77375476	77460684	k	2.56827	6.08726	1.87192	26.4541
MSTRG.11302.4	Tnc	-	chr5	77375763	77460684	j	4.26109	6.3779	1.09865	36.6702
MSTRG.11302.5	Tnc	-	chr5	77375763	77460684	j	0.87496	1.91317	0.438286	5.28022
MSTRG.11302.6	Tnc	-	chr5	77375763	77460684	j	3.2916	2.20156	0.366233	7.1624
MSTRG.11302.8	Tnc	-	chr5	77375850	77439247	j	29.0872	30.9074	5.53582	91.5548
MSTRG.11303.1	MSTRG.11303	.	chr5	81142019	81142253	u	16.8036	0	1.69528	0
MSTRG.11306.1	MSTRG.11306	.	chr5	80160081	80164263	p	1.67986	2.22446	2.00349	2.17092
MSTRG.11308.1	MSTRG.11308	.	chr5	84131145	84131512	u	7.14237	0	4.44796	2.67628
MSTRG.11309.1	Megf9	-	chr5	83988523	84105622	j	8.65809	8.11375	6.3669	4.87493
MSTRG.1131.1	Coq7	-	chr1	172836359	172851158	j	7.29773	4.85462	3.75962	5.68633
MSTRG.11310.2	Cdk5rap2	-	chr5	83792271	83960788	j	1.62737	2.55551	2.45281	2.31696
MSTRG.11310.4	Cdk5rap2	-	chr5	83959392	83960788	j	2.37357	5.81299	3.47659	1.51613
MSTRG.11312.1	Rasef	-	chr5	87545851	87618872	j	3.32938	2.63162	1.06031	1.02581
MSTRG.11313.1	LOC298139	-	chr5	87692739	87706149	j	3.16612	0.535952	1.18318	0
MSTRG.11314.2	Frmd3	+	chr5	87764633	88014126	j	1.63785	1.63772	1.45639	0.686444
MSTRG.11319.1	MSTRG.11319	-	chr5	90047043	90549798	u	0.0193079	3.504	5.06661	0.0141459
MSTRG.11319.2	MSTRG.11319	-	chr5	90047043	90549798	u	6.86746	3.3108	2.20208	9.65911
MSTRG.11319.3	MSTRG.11319	-	chr5	90047043	90549798	u	0.298745	1.09366	1.71179	2.4668
MSTRG.1132.4	MSTRG.1132	-	chr1	172441965	172480512	u	11.9832	11.9083	11.3057	10.7937
MSTRG.11320.1	MSTRG.11320	.	chr5	95561312	95561721	u	4.22254	2.93968	2.49944	1.77861
MSTRG.11321.1	MSTRG.11321	-	chr5	96654064	96662238	u	5.66059	4.06571	3.60679	4.07684
MSTRG.11322.2	Mpdz	-	chr5	95766188	95920634	j	2.15844	3.83099	3.29807	3.40239
MSTRG.11323.1	Zdhhc21	-	chr5	97227466	97286621	k	3.32173	3.25878	3.13107	3.17541
MSTRG.11324.2	Nfib	-	chr5	96758938	96975860	j	1.48915	1.32837	1.30472	1.68784
MSTRG.11324.4	Nfib	-	chr5	96758938	96975860	j	0.232345	0.585335	0.915231	1.12886
MSTRG.11324.5	Nfib	-	chr5	96759100	96975860	j	32.0209	31.2767	33.6875	34.858
MSTRG.11325.1	MSTRG.11325	+	chr5	96770342	96774359	i	2.15879	1.53712	1.52859	1.78146
MSTRG.11326.1	MSTRG.11326	+	chr5	96868563	96876548	i	1.67498	0.946708	0.630118	0.16789
MSTRG.11327.5	LOC100910558	+	chr5	96976207	97014186	m	2.72304	4.98482	4.58541	5.06281
MSTRG.11327.6	LOC100910558	+	chr5	96976207	97014186	n	0.431416	0.384925	1.16215	1.10834
MSTRG.11327.8	LOC100910558	+	chr5	96976207	97014186	j	0.992801	1.63946	0.858382	2.07392
MSTRG.11328.1	Ttc39b	-	chr5	97603330	97708070	j	4.34785	4.89076	4.01828	3.78295
MSTRG.11329.2	Snapc3	+	chr5	97817947	97868273	k	0.31704	2.78833	0.487571	0.00420098
MSTRG.11329.4	Snapc3	+	chr5	97817947	97871680	j	1.33265	1.1843	0.636477	0.83099
MSTRG.11329.6	Snapc3	+	chr5	97817956	97868273	k	5.03231	1.60053	0.971268	2.26901
MSTRG.11330.1	Psip1	-	chr5	97847517	97879289	k	8.95597	10.6024	9.56833	10.8425
MSTRG.11330.3	Psip1	-	chr5	97853064	97879289	j	4.59341	3.49153	2.04094	4.03744
MSTRG.11330.4	Psip1	-	chr5	97853064	97868896	j	1.71234	2.81831	1.28856	1.16327
MSTRG.11330.5	Psip1	-	chr5	97853154	97879289	j	0.876884	0.591489	0.623228	3.41237
MSTRG.11330.6	Psip1	-	chr5	97853154	97879289	j	2.04956	1.15756	1.35647	2.35768
MSTRG.11331.1	MSTRG.11331	.	chr5	99827841	99828470	p	2.85048	2.68009	2.7027	1.85483
MSTRG.11334.1	MSTRG.11334	.	chr5	99449178	99449456	u	1.58002	1.52363	1.45767	1.57232
MSTRG.11336.1	MSTRG.11336	+	chr5	100532910	100919679	u	1.04564	1.25653	2.91943	3.06741
MSTRG.11336.2	MSTRG.11336	+	chr5	100532913	100919679	u	0.951087	1.21971	1.43544	2.36694
MSTRG.11337.1	MSTRG.11337	-	chr5	101116536	101140770	u	1.38822	1.81888	1.47989	1.85528
MSTRG.11338.1	Plin2	-	chr5	101156517	101183068	j	8.62816e-05	0.668058	2.95645	0.245336
MSTRG.11338.2	Plin2	-	chr5	101156517	101183068	j	5.68094	7.02371	7.09317	6.06389
MSTRG.11339.2	Rps6	-	chr5	101371742	101374576	j	3.13384	1.72577	3.36859	2.3636
MSTRG.11340.1	MSTRG.11340	+	chr5	101272337	101369529	u	2.12009	1.98627	2.25254	2.15579
MSTRG.11340.3	MSTRG.11340	+	chr5	101319989	101369529	u	6.70301	8.25189	7.11267	7.16995
MSTRG.11341.1	Acer2	+	chr5	101391885	101442614	j	7.63021	6.36073	7.30027	1.92093
MSTRG.11342.1	Mllt3	-	chr5	102258886	102515405	k	2.28166	3.10854	1.48157	2.72736
MSTRG.11342.2	Mllt3	-	chr5	102258886	102514793	k	1.81182	1.97122	2.14043	1.5958
MSTRG.11342.3	Mllt3	-	chr5	102258886	102292820	j	0.885975	0.132101	2.44173	0.537662
MSTRG.11345.1	MSTRG.11345	+	chr5	102564579	102886887	u	3.02722	3.98054	3.63307	3.12184
MSTRG.11346.1	MSTRG.11346	.	chr5	103766855	103767944	u	2.98954	3.89086	3.75606	2.90971
MSTRG.11348.2	Mtap	+	chr5	103874523	103920656	j	5.00744	4.98296	5.16467	6.0538
MSTRG.11349.1	MSTRG.11349	.	chr5	106905517	106905800	u	0	2.11719	2.70648	1.45875
MSTRG.1135.1	Vps35l	+	chr1	173076225	173179658	j	9.15477	12.7028	9.52659	12.8562
MSTRG.11351.1	MSTRG.11351	+	chr5	108089947	108093033	u	3.06601	2.71896	2.07731	3.24259
MSTRG.11351.2	MSTRG.11351	+	chr5	108089972	108151002	u	1.99305	1.35226	2.45517	0.947834
MSTRG.11352.1	Caap1	-	chr5	109361442	109414371	j	4.14867	4.99045	4.04575	4.97252
MSTRG.11353.1	Plaa	-	chr5	109428446	109448456	j	3.78517	3.88411	4.87284	3.24457
MSTRG.11358.1	MSTRG.11358	-	chr5	109728957	109737787	x	1.04469	1.47422	2.3422	1.79126
MSTRG.11359.1	MSTRG.11359	+	chr5	109920399	109949158	u	1.68438	2.11288	0.820146	0.901117
MSTRG.1136.1	Knop1	-	chr1	173184138	173199345	j	8.986	7.87846	7.03364	11.7761
MSTRG.11361.1	MSTRG.11361	-	chr5	109783100	109819999	u	0.503155	2.40693	1.0186	0.000173249
MSTRG.11361.2	MSTRG.11361	-	chr5	109783100	109819999	u	2.97136	2.71637	3.98027	3.48914
MSTRG.11362.1	MSTRG.11362	+	chr5	109783153	109785720	u	5.98379	7.8253	8.90999	4.99129
MSTRG.11362.2	MSTRG.11362	+	chr5	109783153	109785720	u	3.19886	1.14754	0.593224	3.0589
MSTRG.11363.1	MSTRG.11363	.	chr5	110086059	110086698	u	1.61152	2.52535	3.39667	0.722597
MSTRG.11365.1	MSTRG.11365	+	chr5	109896671	109914156	x	3.74746	4.3668	4.03868	2.91448
MSTRG.11365.2	MSTRG.11365	+	chr5	109896671	109914156	x	2.65402	3.55192	3.83955	2.74786
MSTRG.11365.6	MSTRG.11365	+	chr5	109897847	109914156	u	0.978511	2.48027	1.55106	0.462875
MSTRG.11365.7	MSTRG.11365	+	chr5	109906708	109914156	u	2.89528	3.55757	2.88581	2.27838
MSTRG.11367.1	MSTRG.11367	-	chr5	110907655	110930408	u	1.67005	1.21654	1.54944	0.731197
MSTRG.1137.2	Gprc5b	-	chr1	173316965	173341077	j	12.7066	10.2059	11.9103	7.96949
MSTRG.11373.1	MSTRG.11373	.	chr5	112997107	112997665	u	10.694	15.7258	18.8227	21.4069
MSTRG.11374.1	MSTRG.11374	-	chr5	112421085	112442815	x	1.45703	1.57875	1.86333	1.4154
MSTRG.11375.3	Nfia	+	chr5	112441045	112782982	j	1.53028	1.41779	3.30803	3.0513
MSTRG.11375.4	Nfia	+	chr5	112441261	112782982	j	0.699482	1.40122	0.453229	0.293714
MSTRG.11376.1	Usp1	+	chr5	113586967	113598941	m	1.24347	1.24154	1.19044	1.76286
MSTRG.11377.2	Tm2d1	-	chr5	113020849	113062370	j	7.85061	5.67191	2.7327	9.54148
MSTRG.11377.3	Tm2d1	-	chr5	113020849	113062370	j	1.17244	2.19217	4.41845	4.08872
MSTRG.11377.4	Tm2d1	-	chr5	113020849	113061993	j	1.21095	0.963098	1.06694	1.25135
MSTRG.11377.5	Tm2d1	-	chr5	113056671	113062370	o	1.63544	1.65207	1.11077	1.37926
MSTRG.11379.1	MSTRG.11379	+	chr5	113340383	113402471	x	3.32066	9.81776e-09	4.05505	4.31942
MSTRG.11380.1	Kank4	-	chr5	113401494	113465454	j	4.20199	4.94164	3.45848	1.78906
MSTRG.11381.2	Dock7	-	chr5	113600206	113784176	j	4.31488	4.97004	3.58325	4.54195
MSTRG.11383.2	Atg4c	+	chr5	113867460	113935414	j	2.54159	0.313196	0.693201	1.53327
MSTRG.11384.1	MSTRG.11384	+	chr5	114334169	114337447	u	3.57293	4.03446	3.62478	1.67561
MSTRG.11386.1	Itgb3bp	-	chr5	114460236	114525556	j	1.45406	1.00539	1.20033	2.12922
MSTRG.11388.2	Pgm1	+	chr5	114620838	114654728	j	12.5409	9.50796	12.5616	8.64875e-07
MSTRG.1139.1	Thumpd1	-	chr1	174078596	174084923	m	1.73788	2.11296	1.53569	1.07918
MSTRG.11391.1	Raver2	+	chr5	115701266	115779505	j	5.67141	6.85681	5.48495	9.71169
MSTRG.11392.1	Mir101a	-	chr5	115959169	115976929	k	2.04184	2.87145	2.56708	1.94229
MSTRG.11393.1	Jak1	-	chr5	115780260	115888937	j	37.3013	39.8561	46.3681	43.5543
MSTRG.11394.1	MSTRG.11394	.	chr5	116853301	116853705	u	8.48391	10.4033	6.65955	4.587
MSTRG.11395.3	Lepr	+	chr5	116358793	116475894	j	2.19885	3.01084	3.1657	1.96115
MSTRG.11395.4	Lepr	+	chr5	116358840	116451452	j	1.92351	2.98614	3.22602	1.77081
MSTRG.11397.2	Slc35d1	-	chr5	117933641	117981644	j	3.59444	3.97077	2.7584	3.65459
MSTRG.1140.1	Tmem159	+	chr1	174484365	174503037	j	1.27054	2.98096	8.34378e-06	3.22617
MSTRG.1140.2	Tmem159	+	chr1	174484462	174503037	j	2.12379	1.40454	3.12633	1.23945
MSTRG.11400.1	Mier1	+	chr5	117876135	117927592	j	2.0955	0.502172	0.494955	1.18057
MSTRG.11400.5	Mier1	+	chr5	117880023	117927592	j	2.43968	1.96267	1.31683	1.78462
MSTRG.11402.1	Prkaa2	-	chr5	119807330	119880648	j	1.23084	0.843454	0.757069	0.412697
MSTRG.11402.2	Prkaa2	-	chr5	119808024	119880648	k	4.48926	3.55453	3.45184	0.4303
MSTRG.11403.1	MSTRG.11403	.	chr5	120631494	120631961	u	28.3267	32.9647	35.0752	33.6234
MSTRG.11404.1	MSTRG.11404	-	chr5	120785824	120801043	u	1.721	2.28186	0.948892	1.85297
MSTRG.11404.2	MSTRG.11404	-	chr5	120785824	120786786	u	11.6375	8.92521	4.59882	9.03788
MSTRG.11405.1	MSTRG.11405	-	chr5	121266818	121276063	u	1.58026	3.25501	2.36028	2.88997
MSTRG.11410.1	Ttc4	-	chr5	121444066	121462284	j	7.65842	8.44438	7.73361	6.6948
MSTRG.11412.2	Fam151a	+	chr5	121523362	121527721	n	3.5985	2.86439	2.35088	2.10916
MSTRG.11414.1	Mrpl37	-	chr5	121829547	121846161	j	0.982511	1.48407	0.672255	0.180667
MSTRG.11415.1	MSTRG.11415	+	chr5	121846305	121863727	u	1.97644	1.73043	1.60532	0.000481805
MSTRG.11416.4	Ssbp3	+	chr5	121766997	121829159	j	9.93918	11.4919	10.2994	10.6527
MSTRG.11418.1	MSTRG.11418	+	chr5	121991671	122000889	u	3.21517	4.00434	2.53791	3.90608
MSTRG.11419.1	MSTRG.11419	.	chr5	122098184	122098423	u	0	0	9.03995	0
MSTRG.11420.1	Lrrc42	-	chr5	122014678	122020849	n	3.3581	4.10786	3.11971	4.80561
MSTRG.11422.1	Yipf1	+	chr5	122112202	122138850	j	2.13371	0.939328	2.55261	2.67386
MSTRG.11422.2	Yipf1	+	chr5	122112210	122135737	j	1.04852	0.915855	1.08858	1.21891
MSTRG.11423.2	Ndc1	+	chr5	122156560	122202294	j	3.99551	2.69031	3.82358	3.12643
MSTRG.11424.1	MSTRG.11424	+	chr5	122222193	122412087	u	0.49312	2.8295	2.60321	3.30982
MSTRG.11424.2	MSTRG.11424	+	chr5	122222235	122412087	u	2.08188	1.43127	1.83937	1.43687
MSTRG.11427.1	MSTRG.11427	.	chr5	122697968	122698303	u	5.50773	0.375198	2.5648	1.57135
MSTRG.11429.1	MSTRG.11429	+	chr5	122682238	122691407	u	2.15831	1.35346	1.11625	0.866716
MSTRG.1143.1	Rexo5	+	chr1	174168694	174242198	j	0.929675	1.37306	0.493222	1.52323
MSTRG.11431.1	MSTRG.11431	-	chr5	122776804	122796992	u	0.577173	2.34155	1.65744	2.43193
MSTRG.11431.2	MSTRG.11431	-	chr5	122776804	122796992	u	4.40971	2.89445	3.00326	3.77611
MSTRG.11431.3	MSTRG.11431	-	chr5	122776804	122796992	u	27.1616	33.9285	38.0834	35.1371
MSTRG.11431.4	MSTRG.11431	-	chr5	122776807	122796992	u	1.11111	1.68109	2.12937	1.82179
MSTRG.11432.2	Scp2	-	chr5	122807093	122881332	j	14.2793	14.099	4.88009	16.7652
MSTRG.11433.2	Echdc2	+	chr5	122916160	122934859	j	0.547411	1.25897	2.55513	1.19701
MSTRG.11434.1	MSTRG.11434	-	chr5	122987778	123042717	u	6.01098	6.30851	7.87812	5.92629
MSTRG.11436.1	Gpx7	-	chr5	123143258	123154043	j	1.60622	1.17457	1.35118	2.38604
MSTRG.11437.2	Tut4	+	chr5	123203544	123306478	j	4.27179	5.33315	4.51496	4.90108
MSTRG.11437.3	Tut4	+	chr5	123236275	123306478	j	1.50971	1.5132	1.20699	1.12176
MSTRG.1144.1	Dcun1d3	-	chr1	174242600	174285085	j	2.60218	3.8845	3.47757	3.33155
MSTRG.11441.2	Zfyve9	-	chr5	123372418	123529699	j	3.29146	4.08527	5.16266	4.83808
MSTRG.11442.1	MSTRG.11442	+	chr5	123529656	123534041	x	1.31118	1.51419	1.40689	0.959307
MSTRG.11443.1	MSTRG.11443	-	chr5	123567907	123586870	u	13.1061	11.6569	12.8157	13.0312
MSTRG.11448.1	Nrdc	+	chr5	123755809	123819097	j	1.44372	1.28884	0.968885	0.9885
MSTRG.11448.2	Nrdc	+	chr5	123755809	123819097	j	3.79256	3.14107	2.90148	3.0004
MSTRG.11449.1	Osbpl9	-	chr5	123819109	123874618	j	19.901	12.7761	16.8769	14.9301
MSTRG.11449.11	Osbpl9	-	chr5	123819120	123874618	j	0.939325	2.29946	0.216527	6.95549e-96
MSTRG.11449.2	Osbpl9	-	chr5	123819109	123962179	j	4.03936	11.1561	8.27007	11.0191
MSTRG.11449.3	Osbpl9	-	chr5	123819109	123874618	j	9.66244	8.86794	15.8059	14.2356
MSTRG.11449.4	Osbpl9	-	chr5	123819109	123915725	j	0.0389493	2.29526	0.00142867	2.9752
MSTRG.11449.5	Osbpl9	-	chr5	123819109	123962179	j	3.21949	1.05348	3.04783	0.21618
MSTRG.11449.8	Osbpl9	-	chr5	123819109	123874618	j	1.43529	1.11979	0.2245	0.244571
MSTRG.11449.9	Osbpl9	-	chr5	123819109	123874360	j	1.07255	1.29318	0.30411	1.85914e-62
MSTRG.1145.1	Lyrm1	+	chr1	174284594	174305053	j	1.63466e-05	1.39676	1.47845	2.40106
MSTRG.1145.3	Lyrm1	+	chr1	174285422	174305053	j	1.73794	3.45888	2.7141	4.11891
MSTRG.11451.1	Eps15	+	chr5	124045822	124146221	j	0.852861	1.41866	2.57875	0.00302265
MSTRG.11451.2	Eps15	+	chr5	124045911	124146221	j	4.21499	5.85417	3.87411	7.13111
MSTRG.11452.1	MSTRG.11452	-	chr5	124402138	124408133	u	3.52563	3.25496	2.47015	4.34934
MSTRG.11453.1	Ttc39a	+	chr5	124152092	124204973	j	3.33045	1.42537	0.0925991	1.19514
MSTRG.11453.2	Ttc39a	+	chr5	124165523	124204973	m	4.66448	1.74372	1.62977	1.09304
MSTRG.11454.1	Cdkn2c	-	chr5	124411125	124418420	m	2.24295	1.80296	2.25083	2.68312
MSTRG.11455.1	Faf1	+	chr5	124425864	124479818	j	7.56659	7.01065	6.60964	9.40355
MSTRG.1146.1	MSTRG.1146	+	chr1	174510903	174512298	u	1.05763	2.56894	1.58863	1.68974
MSTRG.11460.1	MSTRG.11460	.	chr5	127379257	127380442	u	1.65168	0.863208	0.807048	0.633672
MSTRG.11461.1	MSTRG.11461	+	chr5	127940965	128145310	u	2.1861	2.43852	2.88803	3.11141
MSTRG.11462.1	MSTRG.11462	+	chr5	128427985	128436427	u	1.54478	1.3447	1.56745	1.80095
MSTRG.11462.2	MSTRG.11462	+	chr5	128430915	128442181	u	5.45338	5.50389	4.65939	7.3852
MSTRG.11462.3	MSTRG.11462	+	chr5	128430920	128436427	u	1.08246	2.11635	1.30751	2.25604
MSTRG.11464.1	MSTRG.11464	+	chr5	128549411	128573697	u	1.22472	1.21311	0.521554	1.93313
MSTRG.11468.2	Cyp4b1	-	chr5	129139044	129156365	n	0.934576	1.01865	3.34363	0.675316
MSTRG.11468.3	Cyp4b1	-	chr5	129139044	129176857	j	0.674648	0.328957	1.9583	0.272307
MSTRG.11469.1	Atpaf1	+	chr5	129266219	129293564	m	5.10752	5.19533	4.37608	4.13384
MSTRG.11470.1	Mob3c	+	chr5	129306587	129315221	j	1.71482	0.909016	0.88013	2.0976
MSTRG.11470.3	Mob3c	+	chr5	129306606	129315221	j	1.41124	2.00339	2.16601	1.47291
MSTRG.11471.1	Mknk1	+	chr5	129318199	129357613	j	2.10076	3.58882	1.39689	2.10807
MSTRG.11471.2	Mknk1	+	chr5	129318199	129357613	j	0.776454	3.29883	2.83165	2.25858
MSTRG.11471.3	Mknk1	+	chr5	129318199	129357613	j	7.0024	6.83322	6.92117	6.48956
MSTRG.11473.1	Lurap1	-	chr5	129613869	129628996	j	3.13368	3.04098	2.68058	1.64189
MSTRG.11475.2	Lrrc41	+	chr5	129554862	129575450	j	1.50896	0.994841	1.20907	2.30875
MSTRG.11479.1	MSTRG.11479	+	chr5	129772791	129775555	u	1.3771	1.416	1.44355	1.82179
MSTRG.11480.1	Pik3r3	+	chr5	129701230	129772469	j	9.51534	5.61844	5.92263	5.87201
MSTRG.11481.1	Ipp	+	chr5	129962520	130001214	k	1.29628	0.763123	2.92422	1.80884
MSTRG.11483.1	Mast2	-	chr5	129776347	129915510	j	1.26867	1.07222	1.4866	5.26997
MSTRG.11483.2	Mast2	-	chr5	129776347	129844129	j	6.43373	5.47885	5.04871	1.58114
MSTRG.11488.1	Ccdc17	+	chr5	130052984	130057317	m	1.72471	0.775701	0.367045	0.192627
MSTRG.11488.4	Ccdc17	+	chr5	130053126	130057317	m	4.70981	3.76097	4.17598	5.09993
MSTRG.11488.5	Ccdc17	+	chr5	130054007	130057317	j	0.959039	1.55255	1.07455	1.58486
MSTRG.11489.1	Nasp	-	chr5	130056629	130082535	j	8.99509	7.00271	7.24834	10.5221
MSTRG.11490.1	Ccdc163	+	chr5	130172832	130178929	j	2.72612	2.16313	2.04617	2.33901
MSTRG.11491.1	MSTRG.11491	.	chr5	130298368	130298687	u	25.5094	29.2842	22.8527	49.0753
MSTRG.11492.2	Zswim5	+	chr5	130347285	130462699	j	1.71189	1.70706	1.22324	0.8529
MSTRG.11493.2	Tesk2	+	chr5	130266343	130271179	n	1.24464	0.883125	1.01831	0.411646
MSTRG.11494.1	Toe1	-	chr5	130270485	130274140	m	1.70159	3.01054	2.93168	1.62533
MSTRG.11494.2	Toe1	-	chr5	130270485	130273155	n	4.42599	3.28249	3.93448	4.47684
MSTRG.11495.1	Mutyh	+	chr5	130274027	130286146	m	2.31637	4.41838	2.32363	4.48898
MSTRG.11497.1	MSTRG.11497	+	chr5	130468837	130478538	u	9.80809	9.79923	10.1225	9.90615
MSTRG.11500.1	MSTRG.11500	-	chr5	130594371	130604342	u	3.70119	4.61473	4.66218	5.45445
MSTRG.11502.2	Rps8	-	chr5	130630387	130633209	j	1.5626	0.878482	1.83216	2.48603
MSTRG.11503.4	Kif2c	-	chr5	130637390	130662637	j	1.62967	1.31782	0.690296	2.79223
MSTRG.11505.1	Tmem53	+	chr5	130722100	130737534	j	5.66562	3.3127	3.16918	4.2751
MSTRG.11505.3	Tmem53	+	chr5	130722144	130737534	j	1.85644	2.16198	1.94318	1.36016
MSTRG.11506.1	MSTRG.11506	-	chr5	130739172	130756882	u	11.2669	12.4376	8.86955	13.2778
MSTRG.11506.2	MSTRG.11506	-	chr5	130739172	130756882	u	3.94797	2.93773	1.43775	3.60833
MSTRG.11506.3	MSTRG.11506	-	chr5	130739172	130756882	u	4.90182	3.67595	7.62885	4.4913
MSTRG.11506.4	MSTRG.11506	-	chr5	130739174	130756882	u	4.89515	5.10659	7.68172	5.01158
MSTRG.11506.5	MSTRG.11506	-	chr5	130739184	130756882	u	2.0331	1.77536	2.0202	1.52513
MSTRG.11507.1	MSTRG.11507	+	chr5	131016130	131143330	u	21.7063	27.8985	24.5013	31.1507
MSTRG.11507.2	MSTRG.11507	+	chr5	131016130	131143330	u	19.0853	13.6936	13.6096	15.2731
MSTRG.11507.3	MSTRG.11507	+	chr5	131016130	131143330	u	1.83263	2.28836	0.571716	6.68524
MSTRG.11507.4	MSTRG.11507	+	chr5	131016130	131143330	u	3.13274	3.16026	3.2326	3.5451
MSTRG.11509.1	Slc6a9	+	chr5	131374577	131408728	j	0.664874	1.73983	2.70455	3.55801
MSTRG.1151.1	MSTRG.1151	+	chr1	175217676	175288670	u	3.99006	4.72421	4.54526	5.55898
MSTRG.11511.1	B4galt2	-	chr5	131412541	131422571	j	12.6355	16.8059	13.3082	27.7985
MSTRG.11512.1	Atp6v0b	-	chr5	131423384	131426430	j	51.3839	43.131	46.3903	42.705
MSTRG.11515.1	Artn	-	chr5	131464564	131468394	m	1.30547	1.19832	1.08867	1.58933
MSTRG.11516.1	St3gal3	-	chr5	131470266	131670798	j	5.52485	4.33992	4.7432	3.53563
MSTRG.11516.2	St3gal3	-	chr5	131470300	131670798	j	0.863685	0.356699	0.000138591	2.18882
MSTRG.11516.3	St3gal3	-	chr5	131470363	131670798	j	1.22339	1.74615	1.72466	1.02788
MSTRG.11517.2	Kdm4a	-	chr5	131673050	131716864	j	14.6934	14.903	15.5139	16.0255
MSTRG.11517.3	Kdm4a	-	chr5	131673050	131716864	j	3.63653	3.18216	2.65877	2.26727
MSTRG.11518.1	MSTRG.11518	+	chr5	131672967	131673623	x	15.9262	10.1745	8.99908	12.1004
MSTRG.11519.1	MSTRG.11519	.	chr5	131833265	131833571	u	4.84719	6.71552	4.99771	11.8211
MSTRG.1152.1	MSTRG.1152	-	chr1	175283020	175288510	u	1.19412	1.00822	0.483585	0.180423
MSTRG.11520.1	Ptprf	-	chr5	131741419	131824466	k	18.8079	15.6673	12.7198	8.84848
MSTRG.11520.2	Ptprf	-	chr5	131741419	131824466	j	7.77122	8.51953	4.32817	8.4363
MSTRG.11520.3	Ptprf	-	chr5	131741759	131823786	j	1.80179	1.41052	1.08688	1.37284
MSTRG.11521.1	Elovl1	+	chr5	131961415	131965958	j	73.9758	88.4288	86.0691	97.7863
MSTRG.11521.2	Elovl1	+	chr5	131961415	131965958	j	3.90798	3.61548	4.07075	3.57092
MSTRG.11521.3	Elovl1	+	chr5	131961416	131965958	j	0.4623	1.19895	1.10409	1.29295
MSTRG.11523.1	MSTRG.11523	+	chr5	131894596	131897248	u	8.19215	9.19829	11.087	17.2836
MSTRG.11524.1	MSTRG.11524	-	chr5	131897273	131943930	u	1.33079	2.06935	0.980221	1.89823
MSTRG.11524.2	MSTRG.11524	-	chr5	131897273	131943930	u	2.1826	1.57218	3.78369	1.27717
MSTRG.11525.1	Med8	+	chr5	131943953	131950315	j	6.39603	4.01603	6.32622	6.54378
MSTRG.11525.2	Med8	+	chr5	131943953	131950315	j	3.09463	2.92767	0.556759	2.37744
MSTRG.11525.3	Med8	+	chr5	131943981	131950315	k	4.4469	5.14122	3.65189	6.90868
MSTRG.11525.4	Med8	+	chr5	131944045	131950315	j	3.66506	5.94844	4.1516	2.04151
MSTRG.11530.2	Ybx1	-	chr5	132882282	132898868	j	23.2063	42.0242	28.5831	39.0772
MSTRG.11530.3	Ybx1	-	chr5	132882282	132898868	j	13.542	12.0439	10.8223	13.2749
MSTRG.11532.1	MSTRG.11532	-	chr5	132906326	132924305	u	24.5587	11.9826	13.5207	14.0749
MSTRG.11532.2	MSTRG.11532	-	chr5	132906326	132924305	u	1.87612	1.6445	1.45747	1.41689
MSTRG.11533.1	Tie1	-	chr5	132000015	132019658	j	7.28804	12.8488	14.0208	14.9623
MSTRG.11534.1	MSTRG.11534	+	chr5	132010255	132010670	i	0.558755	4.29003	1.55471	1.67207
MSTRG.11536.1	Cldn19	+	chr5	132862956	132870372	j	6.23992	4.04036	3.24023	1.2161
MSTRG.11537.2	RGD1305347	+	chr5	132048991	132051925	j	8.02474	3.65969	2.0421	2.36722
MSTRG.11538.1	MSTRG.11538	-	chr5	133072224	133098774	u	1.92042	1.50877	1.46967	1.33858
MSTRG.1154.1	Eef2k	+	chr1	175393111	175456753	k	20.8543	20.4697	26.8583	23.5661
MSTRG.1154.2	Eef2k	+	chr1	175393819	175456753	k	1.78832	0.441898	2.62632	0.8967
MSTRG.11542.1	MSTRG.11542	.	chr5	132604673	132605025	u	44.4484	37.7861	25.7579	59.5327
MSTRG.11544.1	MSTRG.11544	-	chr5	132926794	132928026	u	3.19611	1.03658	2.04886	0.558331
MSTRG.11545.1	Foxj3	+	chr5	133140331	133228489	j	4.58664	4.92924	4.98214	4.91643
MSTRG.11545.2	Foxj3	+	chr5	133140331	133228489	j	4.42675	3.04074	5.50168	2.56756
MSTRG.11546.1	MSTRG.11546	.	chr5	133180215	133180790	i	26.6999	40.188	40.7451	41.7331
MSTRG.11547.1	RGD1563049	+	chr5	133325399	133469525	k	2.39141	3.94197	2.15156	2.09958
MSTRG.11549.1	MSTRG.11549	-	chr5	133856094	133876380	u	2.91692	3.83029	3.11201	2.13315
MSTRG.11549.2	MSTRG.11549	-	chr5	133856129	133877898	u	2.84327	1.72147	1.6061	2.07781
MSTRG.11550.1	Slfnl1	+	chr5	134117052	134123687	m	1.26971	1.3811	1.03558	1.15672
MSTRG.11551.2	Scmh1	+	chr5	133991139	134115893	j	1.24558	1.75193	1.83795	2.01102
MSTRG.11551.3	Scmh1	+	chr5	133991357	134115893	j	2.45944	4.34103	0.348259	0.738754
MSTRG.11553.1	Ctps1	-	chr5	134125022	134153873	j	8.40146	6.99604	7.52314	10.9883
MSTRG.11553.2	Ctps1	-	chr5	134125022	134154157	m	2.13107	2.9749	1.86396	2.22024
MSTRG.11554.1	MSTRG.11554	-	chr5	134275145	134326977	u	6.86295	6.83986	8.44537	3.73035
MSTRG.11555.1	Nfyc	-	chr5	134336802	134405438	j	38.3938	41.9111	44.6455	48.4671
MSTRG.11559.1	MSTRG.11559	.	chr5	134579086	134579354	u	23.2345	21.5414	26.5028	21.2381
MSTRG.1156.2	Cdr2	-	chr1	175502845	175527902	m	0.631591	1.44034	0.448954	1.32437
MSTRG.11561.1	MSTRG.11561	-	chr5	134711615	134767261	u	3.99986	5.56301	4.44298	4.68127
MSTRG.11562.1	Zmpste24	-	chr5	134626699	134660898	j	2.87193	2.89211	3.09145	3.38963
MSTRG.11562.3	Zmpste24	-	chr5	134626789	134661550	j	18.8461	14.3765	16.9193	15.9885
MSTRG.11565.3	Cap1	-	chr5	135142162	135168439	j	31.265	25.216	28.8487	32.3466
MSTRG.11565.4	Cap1	-	chr5	135142162	135169000	j	5.86666	5.47706	5.06953	5.98966
MSTRG.11565.5	Cap1	-	chr5	135142162	135168338	j	15.573	25.2268	17.438	19.7408
MSTRG.11565.6	Cap1	-	chr5	135142162	135161284	j	11.6035	7.33444	7.86785	1.89458
MSTRG.11565.7	Cap1	-	chr5	135142166	135161284	j	5.15463	0.206704	4.85408	1.03009
MSTRG.11566.2	Mycl	+	chr5	135274992	135281581	k	1.57646	1.96577	1.47278	2.12984
MSTRG.11567.2	Trit1	+	chr5	135295349	135338764	j	7.1194	5.22125	5.89617	5.98468
MSTRG.11567.3	Trit1	+	chr5	135295351	135338764	n	3.79059	4.12036	2.99482	2.59386
MSTRG.11568.1	Ppie	-	chr5	135406179	135419232	j	16.8879	14.5068	13.9611	16.6701
MSTRG.11568.2	Ppie	-	chr5	135406179	135419232	j	0.869082	2.69844	4.5119	1.84051
MSTRG.11568.3	Ppie	-	chr5	135406179	135419232	j	1.05617	1.33178	0.889676	1.37982
MSTRG.1157.1	Mettl9	+	chr1	175576632	175623065	j	3.42856	2.50957	3.08189	3.55836
MSTRG.1157.2	Mettl9	+	chr1	175577800	175623065	j	7.62317	5.24266	7.65443	7.61255
MSTRG.11572.1	Pabpc4	+	chr5	135562985	135578985	j	37.43	33.9388	40.6036	23.057
MSTRG.11572.2	Pabpc4	+	chr5	135562985	135578985	j	19.0457	19.0239	12.7058	21.6379
MSTRG.11572.3	Pabpc4	+	chr5	135562985	135578985	j	0.405861	0.692908	1.06456	1.3163
MSTRG.11572.4	Pabpc4	+	chr5	135562985	135578985	j	8.00313	3.13393	2.29649	4.19432
MSTRG.11572.6	Pabpc4	+	chr5	135563120	135578985	j	7.47945	6.68643	6.57596	6.08545
MSTRG.11573.1	Ndufs5	-	chr5	135974029	135979623	j	141.529	114.106	116.254	119.371
MSTRG.11573.2	Ndufs5	-	chr5	135974030	135979623	j	9.10141	5.10333	4.5749	2.01117e-06
MSTRG.11575.1	Rhbdl2	+	chr5	136037560	136081969	k	3.71024	3.8957	2.45578	3.07979
MSTRG.11578.1	MSTRG.11578	-	chr5	136144453	136148080	u	3.17011	0	8.59078	6.24799
MSTRG.11581.1	Fhl3	+	chr5	136953696	136961317	k	0.00186175	3.30899	0.00201368	7.08088
MSTRG.11581.2	Fhl3	+	chr5	136953708	136961317	k	52.6605	29.7983	40.9921	18.7123
MSTRG.11582.11	Macf1	-	chr5	135623804	135644327	j	18.3318	22.2289	18.4267	11.6561
MSTRG.11582.3	Macf1	-	chr5	135623782	135685995	j	1.43594	2.04009	5.80548	5.397
MSTRG.11582.4	Macf1	-	chr5	135623804	135759292	j	4.69904	4.64839	5.81073	5.12064
MSTRG.11582.7	Macf1	-	chr5	135623804	135685995	j	1.9708	3.42134	0.000147398	0.000227895
MSTRG.11582.8	Macf1	-	chr5	135623804	135648856	j	21.3029	25.6818	23.7793	26.1051
MSTRG.11583.1	Sf3a3	+	chr5	136967713	136987343	j	4.11381	4.15284	3.62177	2.7877
MSTRG.11585.1	Inpp5b	+	chr5	136996754	137061315	j	2.04136	3.64085	0.711239	1.52771
MSTRG.11585.3	Inpp5b	+	chr5	136996872	137061315	j	1.68794	0.984447	1.67998	1.39423
MSTRG.11585.4	Inpp5b	+	chr5	137045196	137061315	j	1.95313	4.16046	2.56996	2.04251
MSTRG.11586.1	RGD1559909	-	chr5	137109093	137110224	j	44.199	40.068	42.0004	75.0866
MSTRG.11587.2	Yrdc	+	chr5	137110628	137115124	m	1.31454	1.28296	1.23567	1.12053
MSTRG.1159.1	MSTRG.1159	-	chr1	175620661	175622358	i	2.74387	3.84929	2.13523	2.29247
MSTRG.11590.2	Rspo1	+	chr5	137251681	137272941	j	1.21582	6.1734e-05	1.87248	1.55192
MSTRG.11594.1	Meaf6	+	chr5	137344751	137371659	j	1.77779	1.84466	1.79188	1.39349
MSTRG.11595.2	Zc3h12a	-	chr5	137376624	137380748	n	2.18224	1.25976	2.05171	1.82789
MSTRG.116.1	Tppp	-	chr1	29256134	29281237	j	3.96651	4.6558	4.11431	1.88901
MSTRG.1160.1	Usp31	-	chr1	176211177	176278398	k	1.98578	2.13744	2.16992	1.71082
MSTRG.11600.2	Lsm10	+	chr5	138373906	138376726	j	2.62026	3.51607	3.27863	3.22159
MSTRG.11601.1	Stk40	+	chr5	138380550	138417797	j	2.20999	2.51672	2.73739	2.78567
MSTRG.11602.1	Eva1b	+	chr5	138426871	138433418	j	3.78412	3.55413	3.92559	6.17626
MSTRG.11602.3	Eva1b	+	chr5	138427143	138428609	j	18.1282	16.4527	14.4442	29.8713
MSTRG.11602.4	Eva1b	+	chr5	138427143	138428609	j	20.4455	24.7985	27.1554	40.3371
MSTRG.11604.1	Thrap3	-	chr5	138445284	138487573	j	8.4847	8.35251	7.32669	6.48125
MSTRG.11604.3	Thrap3	-	chr5	138445290	138487573	j	28.3252	27.1426	28.1098	29.8536
MSTRG.11606.1	Map7d1	-	chr5	138524621	138552499	m	2.07133	0.912315	0.778271	0.912973
MSTRG.11606.2	Map7d1	-	chr5	138527947	138552499	j	26.4307	20.5468	18.7024	26.448
MSTRG.11606.3	Map7d1	-	chr5	138527947	138552499	n	35.9762	35.1809	38.6102	37.1587
MSTRG.11606.4	Map7d1	-	chr5	138527947	138552499	j	1.01763	1.33292	0.458076	2.71741
MSTRG.11607.1	MSTRG.11607	+	chr5	138586182	138612852	u	15.8126	17.5125	20.3524	32.326
MSTRG.11608.1	Adprs	-	chr5	138614002	138616441	n	2.95918	2.97972	2.05414	1.91516
MSTRG.11609.1	MSTRG.11609	.	chr5	138629233	138639332	u	2.78218	2.64742	2.46423	2.62963
MSTRG.11612.1	MSTRG.11612	.	chr5	138780473	138781585	p	3.02841	3.67346	3.23648	3.0743
MSTRG.11614.1	RGD1563072	+	chr5	138900576	138905271	m	7.41182	6.78416	8.79709	9.90051
MSTRG.11616.2	Clspn	+	chr5	138850146	138885034	j	0.909261	1.2433	0.542656	1.90181
MSTRG.11617.2	Ncdn	-	chr5	139037828	139047605	j	6.04082	6.60484	4.33308	6.53097
MSTRG.11619.1	MSTRG.11619	.	chr5	139329357	139329749	u	57.2968	59.8525	53.1689	60.0186
MSTRG.1162.1	Scnn1b	+	chr1	176430105	176485142	j	4.08329	3.24691	0.477687	0.40396
MSTRG.11621.1	Sfpq	+	chr5	139337491	139353465	j	11.8722	15.1412	8.44439	20.5212
MSTRG.11621.2	Sfpq	+	chr5	139338075	139353465	k	27.3964	28.1052	27.496	28.7287
MSTRG.11622.2	Zmym1	-	chr5	139364808	139381883	j	2.73296	5.05021	3.96479	3.78805
MSTRG.11624.1	Zmym6	+	chr5	139396727	139445157	m	3.94794	4.15825	4.12946	3.07928
MSTRG.11627.1	Gjb3	-	chr5	139649241	139654935	k	7.71118	6.09725	4.22125	4.57795
MSTRG.11629.1	MSTRG.11629	.	chr5	140626605	140626897	u	2.57881	0	5.96711	3.21272
MSTRG.11630.2	MSTRG.11630	-	chr5	140929882	140956232	u	1.46813	1.21268	1.88272	2.19067
MSTRG.11631.1	Phc2	+	chr5	141004691	141099268	j	0.92705	1.16902	0.160172	0.463119
MSTRG.11631.3	Phc2	+	chr5	141075010	141099268	j	49.4954	54.9382	50.943	51.554
MSTRG.11631.4	Phc2	+	chr5	141075010	141099268	j	12.7811	10.6684	11.4014	12.6215
MSTRG.11631.5	Phc2	+	chr5	141075035	141099268	j	2.63441	2.66332	2.46774	2.10092
MSTRG.11632.1	MSTRG.11632	.	chr5	141159580	141160559	u	2.64404	2.39821	1.66745	2.53796
MSTRG.11633.1	A3galt2	+	chr5	141101053	141119903	j	1.57987	1.98066	1.54954	2.08993
MSTRG.11633.2	A3galt2	+	chr5	141101085	141119903	j	1.28637	0.819052	1.3361	1.04305
MSTRG.11634.1	Zfp362	-	chr5	141117932	141157631	k	3.18522	2.91781	2.66613	2.98493
MSTRG.11634.3	Zfp362	-	chr5	141120434	141157631	j	1.40202	1.18065	1.00727	1.25853
MSTRG.11635.1	MSTRG.11635	+	chr5	141231919	141260619	u	11.1404	10.4106	8.71596	7.88877
MSTRG.11638.1	Rnf19b	+	chr5	141406154	141430025	j	11.0088	13.2182	14.1441	17.0244
MSTRG.11641.1	Fndc5	+	chr5	141481538	141491257	k	1.61657	1.33927	1.55595	2.84152
MSTRG.11642.2	RGD1561149	-	chr5	141564437	141593145	j	24.0129	22.0402	16.6879	18.342
MSTRG.11642.3	RGD1561149	-	chr5	141564437	141583618	j	6.61916	3.16618	2.43716	1.6092
MSTRG.11643.1	S100pbp	-	chr5	141494350	141535624	j	4.45343	7.24386	6.55748	6.66017
MSTRG.11643.2	S100pbp	-	chr5	141494350	141535509	j	4.18357	2.30536	2.69503	2.84734
MSTRG.11643.4	S100pbp	-	chr5	141517226	141527986	j	2.36789	3.1007	1.24395	1.75424
MSTRG.11644.2	MSTRG.11644	+	chr5	141513576	141517162	i	3.77932	4.14855	2.28347	3.26515
MSTRG.11646.1	MSTRG.11646	+	chr5	141675556	141687058	u	12.6578	12.7833	11.3284	12.6436
MSTRG.11648.1	Zbtb8a	-	chr5	141693106	141721446	j	6.36279	6.53554	5.75025	7.92849
MSTRG.11649.3	Sync	+	chr5	141632327	141655925	j	2.75661	3.22831	2.93107	3.73899
MSTRG.11649.4	Sync	+	chr5	141632327	141655925	j	5.20376	7.75935	6.71888	7.31175
MSTRG.11649.5	Sync	+	chr5	141632377	141655925	j	1.27217	0.693354	1.56937	1.01693
MSTRG.1165.2	Gga2	-	chr1	176552048	176557563	j	1.11843	2.11945	1.62335	2.14403
MSTRG.11651.1	Bsdc1	+	chr5	141798981	141830705	k	2.41298	2.57125	2.95309	1.99096
MSTRG.11655.1	MSTRG.11655	-	chr5	141920695	141922330	u	28.3973	25.6757	37.442	28.4947
MSTRG.11657.1	MSTRG.11657	+	chr5	141942644	141951053	u	14.8084	12.2671	12.3371	11.5197
MSTRG.11658.1	MSTRG.11658	-	chr5	141957936	141962274	u	3.08098	3.97879	2.57072	2.37639
MSTRG.11658.2	Ccdc28b	-	chr5	141957936	141968068	k	1.16034	1.50929	2.12499	2.12821
MSTRG.11659.1	Txlna	-	chr5	141968800	141984999	j	20.8064	22.0573	22.8595	28.9914
MSTRG.1166.1	Ears2	-	chr1	176594559	176625836	j	1.85142	2.68108	2.13149	2.35292
MSTRG.11660.1	Kpna6	-	chr5	141987869	142021006	j	9.27216	9.1373	9.31123	7.53274
MSTRG.11661.2	Tmem39b	-	chr5	142024332	142046586	j	2.02986	2.68847	4.73574	3.7814
MSTRG.11661.3	Tmem39b	-	chr5	142024337	142045864	n	2.28287	2.55897	1.83919	1.76439
MSTRG.11662.1	MSTRG.11662	.	chr5	142153590	142155812	u	3.16732	2.54049	2.52241	2.53728
MSTRG.11663.1	Khdrbs1	-	chr5	142051722	142089156	k	2.55972	2.33426	2.83991	2.53923
MSTRG.11664.1	Ptp4a2	+	chr5	142165162	142192429	m	39.6508	43.4577	52.0533	57.031
MSTRG.11664.2	Ptp4a2	+	chr5	142165701	142192429	m	36.0681	30.1722	26.078	16.3475
MSTRG.11667.1	Tinagl1	-	chr5	142513710	142523729	k	40.6603	42.8613	49.646	28.4823
MSTRG.11667.3	Tinagl1	-	chr5	142513775	142523091	j	23.8929	23.3144	19.2866	43.3492
MSTRG.11667.4	Tinagl1	-	chr5	142513775	142523729	k	48.2758	44.7023	55.9903	30.8899
MSTRG.11669.1	MSTRG.11669	-	chr5	142377786	142388893	u	0	2.05519	0	0
MSTRG.11670.3	Col16a1	+	chr5	142388401	142442825	j	6.32872	15.8067	9.76545	19.0466
MSTRG.11670.4	Col16a1	+	chr5	142388418	142442825	j	1.63844	1.66445	1.20421	5.38169
MSTRG.11670.5	Col16a1	+	chr5	142388913	142442825	j	9.27584	12.2388	8.85555	29.7976
MSTRG.11670.7	Col16a1	+	chr5	142388934	142442825	j	4.50338	10.3838	13.6589	8.76404
MSTRG.11671.1	MSTRG.11671	+	chr5	142747526	142792590	u	3.29948	3.72339	4.63173	10.6743
MSTRG.11671.2	MSTRG.11671	+	chr5	142747556	142792590	u	0.426727	2.98627	0.665754	2.8966
MSTRG.11674.2	Zcchc17	-	chr5	142659519	142700426	j	4.92001	7.46579	3.27611	7.78858
MSTRG.11674.3	Zcchc17	-	chr5	142659842	142700426	j	2.01596	2.02554	2.21395	2.6474
MSTRG.11677.1	Pum1	+	chr5	142836901	142954305	j	2.48266	0.500236	5.88026	1.21341
MSTRG.11677.2	Pum1	+	chr5	142836906	142954305	j	3.694	6.7478	2.23954	4.7839
MSTRG.11677.4	Pum1	+	chr5	142837127	142954305	j	0.0701735	0.732808	2.2342	0.182222
MSTRG.11678.2	Laptm5	+	chr5	143074301	143109807	k	2.96878	1.82731	3.60097	6.72643
MSTRG.1168.3	Ndufab1	-	chr1	176648353	176658099	j	90.1646	70.1409	85.1853	54.8425
MSTRG.11680.1	Ptpru	-	chr5	143950558	144024793	j	4.34171	4.68893	4.28937	3.74379
MSTRG.11680.2	Ptpru	-	chr5	143950562	144024793	n	0.963837	1.40477	1.41573	1.02811
MSTRG.11680.4	Ptpru	-	chr5	143950965	144024793	n	0.854371	1.27282	0.858006	0.733357
MSTRG.11682.1	Srsf4	+	chr5	144061268	144090791	j	1.84796	1.7298	1.11361	1.90437
MSTRG.11682.2	Srsf4	+	chr5	144061353	144090791	j	2.79736	2.72607	3.01571	2.75748
MSTRG.11684.1	MSTRG.11684	+	chr5	144292234	144298880	u	1.51534	0.763078	1.18617	0.60807
MSTRG.11685.2	Ythdf2	-	chr5	144381435	144406009	j	12.3399	10.8585	12.1181	12.0199
MSTRG.11686.1	MSTRG.11686	-	chr5	144105371	144264011	u	4.59903	2.84915	5.1474	6.47209
MSTRG.11686.2	MSTRG.11686	-	chr5	144105371	144264011	u	2.74465	3.32717	0.0580036	1.72244
MSTRG.11686.3	MSTRG.11686	-	chr5	144105406	144264011	u	0.883946	0.97738	1.37696	0.693078
MSTRG.11686.4	MSTRG.11686	-	chr5	144105407	144237962	u	1.2105	1.70647	1.98173	1.75101
MSTRG.11686.5	MSTRG.11686	-	chr5	144105410	144237962	u	0.423609	0.599243	1.34507	0.822982
MSTRG.11687.1	MSTRG.11687	+	chr5	144105371	144112504	u	9.67541	11.0327	10.3475	11.2319
MSTRG.11688.1	MSTRG.11688	-	chr5	144494865	144498849	u	3.20827	3.2325	4.27745	6.68522
MSTRG.11689.1	Gmeb1	-	chr5	144418894	144455560	j	2.25164	1.84003	2.12304	2.07891
MSTRG.11691.1	MSTRG.11691	-	chr5	144544704	144546487	u	2.915	1.90131	2.28953	3.69448
MSTRG.11691.2	MSTRG.11691	-	chr5	144544705	144546487	u	18.3601	15.2807	8.03415	10.6026
MSTRG.11692.1	Rcc1	-	chr5	144525969	144539208	j	5.70181	5.5886	4.20907	6.8193
MSTRG.11693.1	MSTRG.11693	+	chr5	144504382	144507554	u	11.4512	10.0337	6.67537	10.8156
MSTRG.11693.2	MSTRG.11693	+	chr5	144504410	144506648	u	2.73778	3.06798	4.8607	2.67963
MSTRG.11693.3	MSTRG.11693	+	chr5	144505223	144507554	u	0.249801	0.692693	10.8767	0.340837
MSTRG.11694.1	Trnau1ap	-	chr5	144507702	144524115	j	7.83211	4.81764	8.39665	4.7874
MSTRG.11694.11	Trnau1ap	-	chr5	144507768	144524115	j	1.5491	2.34865	1.18898	3.25551
MSTRG.11694.2	Trnau1ap	-	chr5	144507702	144524115	j	6.29762	3.52492	3.98588	9.41057
MSTRG.11694.3	Trnau1ap	-	chr5	144507702	144524115	j	5.19863	3.29517	2.54956	4.80556
MSTRG.11694.4	Trnau1ap	-	chr5	144507702	144524115	j	0.00158894	2.99994	0.00167601	3.79665
MSTRG.11694.5	Trnau1ap	-	chr5	144507702	144524115	j	0.819093	1.70835	0.715793	1.48979
MSTRG.11694.7	Trnau1ap	-	chr5	144507702	144524115	j	1.89916	2.93224	2.91911	2.13325
MSTRG.11694.9	Trnau1ap	-	chr5	144507702	144512164	j	2.33142	1.34803	0.958264	1.72895
MSTRG.11695.1	MSTRG.11695	+	chr5	144647929	144648460	u	2.19435	3.30444	3.17019	3.81727
MSTRG.11696.1	MSTRG.11696	-	chr5	144549380	144621071	u	4.73593	4.29317	3.56469	3.83075
MSTRG.11696.2	MSTRG.11696	-	chr5	144549380	144595735	u	4.96538	1.6875	3.53069	2.56579
MSTRG.11696.3	MSTRG.11696	-	chr5	144549388	144621071	u	0.709638	2.53664	1.06398	1.20202
MSTRG.11697.1	Med18	-	chr5	144663318	144668643	m	5.51349	7.28699	3.32874	5.59268
MSTRG.11699.1	MSTRG.11699	+	chr5	144701528	144702277	u	25.1305	27.8994	23.9035	22.4098
MSTRG.117.1	Nkd2	+	chr1	29443892	29470865	m	3.5975	3.98289	2.0731	2.66535
MSTRG.11701.1	Dnajc8	+	chr5	144745054	144763106	j	5.39437	2.54208	2.62379	2.04762
MSTRG.11704.1	Eya3	+	chr5	144853260	144937880	j	5.14981	6.53246	6.07029	5.93725
MSTRG.11707.1	Stx12	-	chr5	145063603	145092377	j	2.41236	1.09895	1.94026	1.31051
MSTRG.1171.1	Chp2	+	chr1	176768651	176774037	k	10.8895	10.6269	13.6105	7.97115
MSTRG.11710.1	MSTRG.11710	.	chr5	145296739	145297127	u	9.94206	3.37861	6.67941	8.66547
MSTRG.11711.1	Ahdc1	+	chr5	145228107	145295675	j	5.99723	6.55336	9.67734	8.03508
MSTRG.11711.2	Ahdc1	+	chr5	145228263	145295675	j	1.67598	2.05982	0.779501	1.38819
MSTRG.11712.1	MSTRG.11712	-	chr5	145289294	145293475	i	1.6621	2.26574	1.41451	2.0601
MSTRG.11713.1	Wasf2	+	chr5	145336834	145401986	j	27.1837	22.7192	28.6201	29.4585
MSTRG.11716.2	Sytl1	-	chr5	145452537	145462922	j	21.1728	14.6841	7.26954	11.1431
MSTRG.11717.1	Map3k6	+	chr5	145440329	145452212	j	2.77346	3.0796	3.80926	4.6627
MSTRG.11719.1	Wdtc1	-	chr5	145491465	145540525	m	5.75148	6.08422	7.7471	8.2526
MSTRG.11719.2	Wdtc1	-	chr5	145491465	145540674	n	15.7001	16.9903	14.5158	11.0001
MSTRG.1172.1	MSTRG.1172	+	chr1	177503362	177535632	u	6.09318	4.75359	5.98941	5.79605
MSTRG.1172.2	MSTRG.1172	+	chr1	177503362	177535632	u	8.41341	10.7489	7.28597	9.42287
MSTRG.11720.1	MSTRG.11720	+	chr5	145654984	145664045	u	4.39141	0.693921	0.353584	0.170646
MSTRG.11722.1	Slc9a1	+	chr5	145576354	145629630	m	20.0408	17.1736	17.5472	16.8927
MSTRG.11722.2	Slc9a1	+	chr5	145576354	145629630	j	2.37115	3.53007	3.20396	2.68083
MSTRG.11723.1	MSTRG.11723	-	chr5	145706430	145713260	u	13.564	8.58718	13.0821	10.4543
MSTRG.11724.1	Nudc	-	chr5	145734493	145771456	j	2.65053	2.71056	2.94646	2.09512
MSTRG.11725.1	Kdf1	+	chr5	145745099	145757077	j	2.28524	1.59838	0.955633	0.819224
MSTRG.11726.1	Gpn2	+	chr5	145800112	145817251	k	2.58407	2.65947	2.98872	2.12028
MSTRG.11727.1	Zdhhc18	-	chr5	145826717	145859986	n	5.03007	5.05546	3.04359	4.2939
MSTRG.11727.2	Zdhhc18	-	chr5	145831429	145859986	m	2.81794	1.20474	2.78335	2.65926
MSTRG.11727.3	Zdhhc18	-	chr5	145831445	145859986	m	1.15819	1.14616	0.0268855	0.815213
MSTRG.11728.1	Pigv	-	chr5	145886597	145901793	j	2.7978	2.58873	3.08764	2.26775
MSTRG.11729.3	Arid1a	-	chr5	145908181	145982194	j	3.55019	3.65418	4.55186	3.22896
MSTRG.1173.1	Tnrc6a	+	chr1	177646095	177715660	j	11.6462	11.2161	11.8252	10.9769
MSTRG.11730.1	Rps6ka1	-	chr5	146079018	146118290	m	8.51057	8.25257	6.36576	7.25114
MSTRG.11732.1	Dhdds	-	chr5	146192126	146224443	k	0.84822	2.12671	0.000323747	0.928575
MSTRG.11732.3	Dhdds	-	chr5	146195933	146224443	j	5.25897	5.72356	6.10958	6.50767
MSTRG.11733.1	MSTRG.11733	.	chr5	146322784	146323690	u	11.7181	14.9756	18.6932	18.8003
MSTRG.11734.1	MSTRG.11734	+	chr5	146289358	146318989	u	3.40146	2.67017	1.59682	1.77284
MSTRG.11736.1	Cep85	-	chr5	146356576	146404137	j	4.56911	4.96094	4.85378	4.077
MSTRG.11736.2	Cep85	-	chr5	146356576	146404137	j	2.70493	2.66271	3.88858	2.26018
MSTRG.11736.3	Cep85	-	chr5	146356576	146404137	j	1.96213	2.5363	1.31528	2.14645
MSTRG.11739.1	Fam110d	-	chr5	146471049	146474019	j	3.38885	1.51362	2.68318	2.86432
MSTRG.1174.2	Lcmt1	+	chr1	177904179	177960106	j	1.68682	0.391794	1.39252	0.814911
MSTRG.11741.1	Trim63	+	chr5	146533510	146547344	j	7.04087	11.1916	18.3473	0.733305
MSTRG.11744.1	Stmn1	+	chr5	146681401	146687151	j	117.561	119.726	67.248	130.388
MSTRG.11745.1	Paqr7	+	chr5	146708752	146720596	k	2.7408	2.39009	1.48811	2.08604
MSTRG.11746.2	Mtfr1l	-	chr5	146736547	146746990	j	2.7922	2.22398	2.05406	2.05818
MSTRG.11746.3	Mtfr1l	-	chr5	146736931	146746990	j	12.1558	11.8173	10.8288	8.83388
MSTRG.11747.1	MSTRG.11747	-	chr5	146748622	146763049	u	60.8836	73.9803	73.3778	101.819
MSTRG.11748.2	Man1c1	-	chr5	146774156	146914078	j	0.964882	1.76244	1.73159	1.07244
MSTRG.11749.1	MSTRG.11749	.	chr5	146987728	146988037	u	4.67631	0.498066	2.89428	2.59231
MSTRG.1175.1	MSTRG.1175	.	chr1	179078015	179078326	u	0	1.45899	0.942682	1.51948
MSTRG.11750.1	Ldlrap1	-	chr5	146947770	146978601	k	7.09028	7.18389	5.36369	8.11309
MSTRG.11751.1	Maco1	-	chr5	147012427	147075001	n	1.73643	2.3575	1.99801	1.45598
MSTRG.11753.1	MSTRG.11753	.	chr5	147100011	147100290	i	19.4484	3.00018	1.43576	37.1637
MSTRG.11755.2	Rsrp1	+	chr5	147147810	147153724	m	61.0244	59.5686	51.6131	58.5946
MSTRG.11755.3	Rsrp1	+	chr5	147147810	147153724	j	1.21215	1.55704	1.37413	0.786976
MSTRG.11756.1	Syf2	+	chr5	147156377	147164416	j	1.98041	3.14224	1.96691	0.969558
MSTRG.11758.2	Srrm1	-	chr5	147559568	147591938	j	3.59102	6.92303	8.63234	4.25362
MSTRG.11758.4	Srrm1	-	chr5	147559568	147591938	j	3.31758	3.57772	2.41099	1.54677
MSTRG.11758.5	Srrm1	-	chr5	147559568	147591938	j	4.60622	0.0031995	1.42186e-12	1.53106
MSTRG.11758.7	Srrm1	-	chr5	147559611	147591743	j	5.81771	5.43643	3.39251	3.45809
MSTRG.11759.3	Ncmap	-	chr5	147607071	147637637	j	0.000543467	0.909878	2.31977	0.000101531
MSTRG.11759.5	Ncmap	-	chr5	147607100	147617285	j	2.68955	0.547224	0.340891	0.160179
MSTRG.11759.6	Ncmap	-	chr5	147609537	147623329	j	42.5847	31.1721	37.0128	15.9009
MSTRG.11759.7	Ncmap	-	chr5	147609537	147623329	k	2.86399	3.60656	0.00119187	1.81337e-17
MSTRG.11759.8	Ncmap	-	chr5	147609538	147637637	j	1.23133	1.17592	1.78091e-09	0.22821
MSTRG.11759.9	Ncmap	-	chr5	147609538	147637895	k	2.53813	3.47244	2.55562e-11	0.396316
MSTRG.1176.5	Arhgap17	-	chr1	177807595	177896865	m	4.2839	5.50726	5.34477	4.51507
MSTRG.11760.1	MSTRG.11760	-	chr5	147687318	147725241	u	9.15694	7.79955	8.21185	6.12238
MSTRG.11761.1	MSTRG.11761	+	chr5	147648165	147653694	u	0.751247	1.84509	1.57129	0.272725
MSTRG.11762.1	Rcan3	-	chr5	147650967	147671866	j	2.76851	2.84617	2.14659	4.04797
MSTRG.11762.2	Rcan3	-	chr5	147650967	147671866	j	3.15519	1.34367	2.37927	3.42617
MSTRG.11763.2	Grhl3	-	chr5	147774386	147806326	j	4.49539	5.34056	0.935506	3.96022
MSTRG.11763.3	Grhl3	-	chr5	147774386	147806326	j	3.94632	2.6233	1.76576	1.56485
MSTRG.11767.1	Srsf10	+	chr5	148088706	148103955	j	1.74084	2.12304	1.98391	2.95442
MSTRG.11767.3	Srsf10	+	chr5	148088782	148103955	j	1.80823	1.82646	0.883949	0.344459
MSTRG.11767.4	Srsf10	+	chr5	148088795	148103955	j	4.50015	4.03861	4.90052	4.52201
MSTRG.11767.5	Srsf10	+	chr5	148088815	148103955	j	0.491642	1.28116	1.18418	1.05981
MSTRG.11769.2	Hmgcl	+	chr5	148187167	148192073	n	0.867775	1.53306	1.54938	0.975966
MSTRG.1177.1	MSTRG.1177	.	chr1	179268007	179268342	u	19.6704	22.1367	32.2432	24.356
MSTRG.11770.1	MSTRG.11770	-	chr5	148205995	148216512	u	21.182	23.163	23.0413	24.4972
MSTRG.11771.1	Gale	+	chr5	148193869	148198390	m	6.98468	3.91712	1.90589	10.7895
MSTRG.11771.2	Gale	+	chr5	148193869	148198390	n	5.62896	4.19057	2.07373	6.80547
MSTRG.11773.1	Eloa	-	chr5	148229508	148246914	j	11.5723	11.3813	9.80449	8.89555
MSTRG.11774.1	Rpl11	-	chr5	148274065	148277617	j	1006.09	866.511	972.504	996.795
MSTRG.11774.2	Rpl11	-	chr5	148274065	148277617	j	6.16432	30.2362	61.7037	4.872
MSTRG.11775.1	Id3	+	chr5	148372358	148374353	j	0.976938	0.390686	2.32105	0.249836
MSTRG.11776.1	MSTRG.11776	+	chr5	148399594	148422593	u	3.00889	2.52185	2.13916	2.84364
MSTRG.11778.1	MSTRG.11778	+	chr5	148433506	148476028	u	8.15098	9.437	10.1605	12.117
MSTRG.11778.2	MSTRG.11778	+	chr5	148433506	148476028	u	2.80476	3.17912	1.39872	2.75762
MSTRG.11779.1	MSTRG.11779	-	chr5	148474653	148476850	u	0.802389	3.09554	0	4.79019
MSTRG.1178.1	Kdm8	+	chr1	180013923	180032136	m	0.921419	1.43415	1.08899	1.018
MSTRG.11781.1	MSTRG.11781	.	chr5	148532213	148532877	u	1.51193	1.42162	2.15279	1.10239
MSTRG.11782.1	Zfp46	+	chr5	148519387	148530585	o	4.182	3.34082	4.7894	3.75624
MSTRG.11782.2	Zfp46	+	chr5	148519387	148530585	o	0.909994	4.09827	2.96097	3.48324
MSTRG.11783.1	MSTRG.11783	.	chr5	148576625	148580170	p	1.32326	1.63429	1.35939	1.04284
MSTRG.11784.1	MSTRG.11784	.	chr5	148585477	148594241	u	1.10625	2.61951	1.28536	1.28693
MSTRG.11785.1	Hnrnpr	+	chr5	148542971	148574985	j	3.10365	3.38555	3.57234	3.42287
MSTRG.11785.2	Hnrnpr	+	chr5	148543028	148574985	j	4.89702	5.1105	6.00178	6.66227
MSTRG.11787.1	Kdm1a	-	chr5	148781982	148838319	j	3.74978	2.6496	3.78545	4.88834
MSTRG.11788.1	Ephb2	-	chr5	148895370	149077018	j	4.15143	4.54389	3.94175	7.66315
MSTRG.1179.2	Nsmce1	-	chr1	180032118	180058503	j	22.544	21.1448	20.9433	21.9285
MSTRG.11792.1	Zbtb40	-	chr5	149216118	149242795	j	8.19923	8.62549	6.67157	4.83048
MSTRG.11793.2	Wnt4	+	chr5	149512616	149535719	j	7.91985	7.70654	6.37118	6.13503
MSTRG.11794.1	Cdc42	-	chr5	149553718	149593346	j	0.601973	4.18992	0.557079	2.02827e-05
MSTRG.11794.4	Cdc42	-	chr5	149553776	149593346	j	64.5522	62.3594	64.9944	64.6048
MSTRG.11794.6	Cdc42	-	chr5	149557831	149588886	j	4.3362	1.46101	5.64862	0.278708
MSTRG.11796.2	Rap1gap	+	chr5	149918226	149939254	n	8.04427	5.46113	4.64888	1.59262
MSTRG.11796.3	Rap1gap	+	chr5	149918226	149939254	j	2.88318	1.57036	0.887562	1.54418
MSTRG.11797.1	MSTRG.11797	+	chr5	149677447	149778842	u	42.1185	57.6149	55.2591	70.5703
MSTRG.11797.2	MSTRG.11797	+	chr5	149677447	149778842	u	11.1351	9.40376	17.4301	14.0979
MSTRG.11797.3	MSTRG.11797	+	chr5	149677468	149778842	u	1.14904	1.91342	0.418447	1.20009
MSTRG.11798.1	MSTRG.11798	-	chr5	149777470	149823309	x	330.656	348.48	300.634	404.353
MSTRG.11799.2	Usp48	+	chr5	149800276	149867838	j	2.5783	1.67165	4.46927	4.04099
MSTRG.11799.3	Usp48	+	chr5	149800634	149867838	j	2.35508	3.61551	1.92885	1.08154
MSTRG.118.2	Brd9	-	chr1	29329981	29357017	j	15.5037	11.5302	12.8105	13.2912
MSTRG.118.3	Brd9	-	chr1	29329981	29357017	j	0.908288	2.55052	2.43086	3.44266
MSTRG.118.4	Brd9	-	chr1	29329981	29357017	j	1.56221	3.02017	1.91514	2.00675
MSTRG.118.5	Brd9	-	chr1	29329987	29357017	j	1.85275	1.50539	1.76051	1.58915
MSTRG.1180.1	Il4r	+	chr1	180115109	180139981	j	1.93725	4.69273	1.53445	5.11922
MSTRG.1180.2	Il4r	+	chr1	180115117	180139981	j	7.00661	6.26387	8.36813	1.52734
MSTRG.1180.3	Il4r	+	chr1	180115117	180139981	j	0.760582	0.347917	1.8339	0.416611
MSTRG.11800.1	Ece1	+	chr5	150076952	150179375	k	6.51794	8.84602	11.2493	9.98271
MSTRG.11800.3	Ece1	+	chr5	150125901	150179375	j	18.8337	25.2199	14.7941	28.7197
MSTRG.11800.4	Ece1	+	chr5	150133127	150179375	j	20.5195	16.9494	26.102	13.4884
MSTRG.11801.1	Hp1bp3	+	chr5	150434639	150463004	j	1.85071	2.38688	1.9943	1.84575
MSTRG.11801.3	Hp1bp3	+	chr5	150435787	150463004	j	5.3354	6.40798	6.7459	5.10589
MSTRG.11803.2	Eif4g3	+	chr5	150195322	150418861	j	2.76374	2.7735	2.8791	2.53038
MSTRG.11803.6	Eif4g3	+	chr5	150198048	150418861	j	5.97833	7.10208	6.92419	7.47267
MSTRG.11803.7	Eif4g3	+	chr5	150198048	150418861	j	2.79057	3.50181	1.53205	1.6504
MSTRG.11803.8	Eif4g3	+	chr5	150198556	150418861	j	9.16309	7.39087	9.15336	9.2832
MSTRG.11806.1	Camk2n1	+	chr5	150673060	150676600	k	14.4383	15.4153	18.3113	15.6907
MSTRG.11807.1	Pink1	-	chr5	150530523	150543043	j	49.3841	52.8881	62.7691	29.8106
MSTRG.11807.4	Pink1	-	chr5	150530971	150543043	j	2.15296	2.13472	2.56461	1.52317
MSTRG.11809.2	Pla2g5	-	chr5	151041373	151062670	m	4.06533	3.56322	3.79295	3.06974
MSTRG.11812.1	Otud3	-	chr5	151135880	151162180	j	4.86872	2.72194	3.23239	4.09716
MSTRG.11812.2	Otud3	-	chr5	151135880	151162180	j	0.548998	1.61772	1.03316	0.279698
MSTRG.11815.1	MSTRG.11815	.	chr5	151410371	151410598	u	15.6482	0	6.07629	24.2408
MSTRG.11817.1	Capzb	+	chr5	151435704	151535409	j	30.9012	27.7177	29.4225	0.487277
MSTRG.11818.1	Slc66a1	-	chr5	151537874	151552268	j	4.77026	3.91357	3.3217	3.31681
MSTRG.11818.2	Slc66a1	-	chr5	151537874	151546316	n	0.482198	0.763024	0.600032	1.4537
MSTRG.11819.1	MSTRG.11819	+	chr5	151537875	151539315	u	1.60809	3.37792	1.97229	1.11956
MSTRG.1182.1	MSTRG.1182	-	chr1	180441885	180588268	u	1.01302	0.953282	1.7634	0.516363
MSTRG.11820.1	Akr7a2	+	chr5	151549611	151560914	k	3.7223	3.4034	2.44021	4.37919
MSTRG.11822.1	Mrto4	-	chr5	151601829	151608549	j	8.82048	7.86498	8.77761	8.85647
MSTRG.11825.2	Iffo2	+	chr5	151869547	151876919	n	1.05856	1.54243	1.12074	1.1473
MSTRG.11829.1	MSTRG.11829	.	chr5	152218608	152224422	u	3.70558	1.58816	1.35663	0.897684
MSTRG.1183.1	Katnip	+	chr1	180270410	180436766	j	0.998244	3.99725	4.07542	4.12921
MSTRG.1183.2	Katnip	+	chr1	180270411	180436766	j	3.07166	0.0052322	0.0155063	0.0360228
MSTRG.11830.1	Ubr4	+	chr5	151635864	151743921	j	3.71049	3.68886	4.72698	2.91139
MSTRG.11830.3	Ubr4	+	chr5	151679265	151743921	j	14.5107	14.0038	15.5987	14.2238
MSTRG.11831.1	MSTRG.11831	-	chr5	152792247	152934919	u	8.5402	9.54793	12.0467	16.9182
MSTRG.11831.2	MSTRG.11831	-	chr5	152792247	152952708	u	10.7328	6.94052	5.01656	2.55754
MSTRG.11831.4	MSTRG.11831	-	chr5	152792247	152860389	u	2.60554	4.53465	2.58874	1.67392
MSTRG.11832.1	MSTRG.11832	-	chr5	152989030	152994410	u	2.24181	2.45993	1.76405	2.7544
MSTRG.11833.1	MSTRG.11833	+	chr5	152994396	153017223	u	7.19205	6.44574	8.78562	9.47465
MSTRG.11833.3	MSTRG.11833	+	chr5	152994434	153017223	u	0.746298	1.7551	2.03457	2.76662
MSTRG.11833.5	MSTRG.11833	+	chr5	152995705	153017223	u	18.1089	16.0722	7.83472	15.1486
MSTRG.11837.1	Sdhb	+	chr5	153264800	153286460	j	6.38326	5.90137	5.77926	4.97098
MSTRG.11838.1	Atp13a2	+	chr5	153292718	153312140	j	8.05979	7.43166	6.83846	8.92857
MSTRG.11838.2	Atp13a2	+	chr5	153292793	153312140	j	10.1731	8.61316	9.00741	8.53083
MSTRG.1184.2	Xpo6	-	chr1	180672191	180761696	j	1.23466	1.74549	1.30451	1.09917
MSTRG.11840.1	MSTRG.11840	.	chr5	153387078	153387689	u	2.31974	2.45369	3.29704	2.33841
MSTRG.11841.1	Necap2	-	chr5	153370363	153382727	j	36.1302	37.5868	37.1421	43.9092
MSTRG.11842.2	Crocc	-	chr5	153320975	153363507	j	0.935488	0.880608	2.10555	2.41056
MSTRG.11844.3	Szrd1	-	chr5	153418798	153443243	j	10.193	14.8207	11.9454	6.68763
MSTRG.11844.4	Szrd1	-	chr5	153418798	153443243	j	2.47393	2.34948e-05	2.21721e-05	7.50921
MSTRG.11845.2	Fbxo42	+	chr5	153451205	153509556	j	8.51519	8.46732	8.08881	7.88884
MSTRG.11846.2	Cplane2	+	chr5	153515538	153523187	j	1.8416	1.72083	2.5779	2.78868
MSTRG.11846.3	MSTRG.11846	+	chr5	153520354	153523187	u	0.659079	1.6138	0.726328	0.313935
MSTRG.11847.2	Arhgef19	+	chr5	153536061	153555102	j	3.64258	3.41826	0.990964	6.02903
MSTRG.11847.3	Arhgef19	+	chr5	153539156	153555102	j	2.72906	2.11101	2.30102	0.937109
MSTRG.11848.1	MSTRG.11848	.	chr5	153655058	153655449	u	11.2377	12.9986	17.0632	12.7343
MSTRG.11852.2	Zbtb17	+	chr5	153753554	153774609	j	13.3415	11.441	11.584	11.0144
MSTRG.11853.2	Spen	-	chr5	153775315	153848843	m	5.49865	5.85724	6.02773	5.42295
MSTRG.11853.4	Spen	-	chr5	153775345	153829903	j	1.32644	0.714078	0.520699	0.475075
MSTRG.11854.1	Fblim1	-	chr5	153883945	153913940	j	6.37431	10.1407	12.0894	9.27104
MSTRG.11854.2	Fblim1	-	chr5	153883945	153912502	j	0.502665	0.0810118	0.888156	1.43909
MSTRG.11854.3	Fblim1	-	chr5	153883945	153913940	j	8.11193	5.89746	6.47634	2.0205
MSTRG.11855.1	Plekhm2	-	chr5	153932074	153978617	k	2.72465	3.25537	3.23316	2.20805
MSTRG.11855.4	Plekhm2	-	chr5	153933799	153978617	j	1.44861	1.27492	1.5956	2.30798
MSTRG.11856.1	Ddi2	-	chr5	153989619	154035470	j	6.51742	7.13373	8.31668	6.19364
MSTRG.11856.2	Ddi2	-	chr5	153989620	154027113	n	1.56825	1.52642	1.85977	1.01257
[truncated: 23,720 more rows]

## Sheet: S3
Table S3. Deregulated genes in normal and injured tissues of rat urethra. Genes with FDR values smaller than 0.05 (edgeR) were regarded as deregulated genes.
tracking_id	gene	normal_2A	normal_3A	injured_3A	injured_4A	logFC	logCPM	LR	PValue	FDR	regulation
MSTRG.3980.2	Eln	0.0106474	0.288156	101.993	392.826	9.84256	7.69089	62.4154	2.78137e-15	1.01339e-11	up
MSTRG.5163.2	Igfbp3	0.00758868	0.00368156	131.906	51.4705	9.49531	6.31105	66.5927	3.3382e-16	2.86172e-12	up
MSTRG.9861.1	Lamp1	0	0	61.9139	93.9316	9.31099	6.07616	80.6568	2.68527e-19	6.90598e-15	up
MSTRG.13216.2	Col14a1	7.9864e-11	2.46207e-09	38.7015	98.6082	9.12418	5.89908	64.2134	1.11647e-15	7.17834e-12	up
MSTRG.14166.1	Anxa2	7.17234e-05	9.57538e-05	4.06905e-05	116.574	8.87505	5.66867	20.7226	5.30865e-06	0.00220206	up
MSTRG.3873.1	MSTRG.3873	0	0	53.9955	0	7.80935	4.67995	18.9979	1.30861e-05	0.00442827	up
MSTRG.15405.1	MSTRG.15405	0	0	34.3631	6.24799	7.39191	4.32301	30.8516	2.78538e-08	3.77023e-05	up
MSTRG.15484.1	Parg	0	0	38.9756	0	7.34073	4.27563	18.407	1.78398e-05	0.00546195	up
MSTRG.12080.1	Daxx	0	0	33.7145	0	7.13065	4.10251	23.8742	1.02842e-06	0.000601109	up
NM_001105841	Cavin1	2.66429e-06	5.40923e-06	1.84259e-05	32.5146	7.04698	4.04589	25.7166	3.95407e-07	0.000299091	up
NM_001034073	Tpm1	0.0127952	0.367176	18.0823	60.1722	6.99331	5.1499	46.4187	9.54981e-12	2.23275e-08	up
MSTRG.3535.6	Mylk	2.89948e-10	0.00344164	12.8227	17.9308	6.96296	3.98743	43.3227	4.64174e-11	9.18279e-08	up
MSTRG.3544.2	Rpl35al1	6.47382e-06	5.56063e-06	5.68474e-06	27.2541	6.80126	3.84482	31.5924	1.90175e-08	2.87702e-05	up
MSTRG.13594.4	Tuba1a	3.5124e-07	5.39423e-08	5.94253e-08	27.0572	6.7913	3.83672	31.7373	1.76499e-08	2.83699e-05	up
MSTRG.2901.2	Lasp1	0.000333984	0.00388385	0.000592547	26.8668	6.75787	3.82905	31.7852	1.72198e-08	2.83699e-05	up
MSTRG.4580.2	Mpz	0.730977	0.000231263	81.9643	0.000157722	6.48284	5.23291	16.503	4.85742e-05	0.0112543	up
MSTRG.3341.2	App	0.00062709	0.000254914	0.00453693	21.5697	6.4705	3.59087	30.5556	3.24436e-08	4.12882e-05	up
MSTRG.15376.1	MSTRG.15376	0	0	20.5154	0	6.40408	3.54822	29.2232	6.45031e-08	6.14404e-05	up
MSTRG.3041.1	Acbd4	5.14483e-05	4.61599e-05	12.7815	6.9927	6.35104	3.50638	28.1853	1.1024e-07	9.77641e-05	up
MSTRG.9367.3	Pacsin3	0.000351054	0.000300993	12.0993	5.59144	6.18936	3.39348	25.204	5.15752e-07	0.00035849	up
MSTRG.8519.5	RT1-CE13	2.4293e-193	0	17.4886	0	6.17729	3.38479	24.6763	6.78132e-07	0.000425371	up
MSTRG.7376.2	Rpl13	2.09114e-05	3.13034e-05	1.73747e-05	16.7084	6.11059	3.33092	23.4203	1.30198e-06	0.000730888	up
NM_001106848	Rnf7	7.84716e-06	6.49765e-06	5.17208	10.3569	6.00765	3.2629	22.1125	2.57136e-06	0.00122918	up
MSTRG.8519.8	RT1-CE13	0	0	15.4209	1.5404e-145	5.99905	3.26161	21.5265	3.48979e-06	0.00157457	up
MSTRG.4795.2	Hsd17b11	0.0133766	0.00307042	0.0130219	16.4186	5.99684	3.31558	22.7631	1.83249e-06	0.000961798	up
MSTRG.880.3	Anpep	0.012668	0.00884425	0.00471107	16.468	5.97371	3.31831	22.7649	1.83076e-06	0.000961798	up
MSTRG.4612.2	Atp1a2	0.00332182	0.0015803	14.7663	0.00326154	5.91039	3.22085	20.5014	5.95877e-06	0.0024325	up
NM_001301736	Tpm1	0.000134122	5.42215e-05	0.00192784	14.0409	5.86263	3.16587	19.5257	9.92531e-06	0.00352487	up
MSTRG.8261.1	LOC103692764	0	0	6.05775	7.00955	5.76297	3.10367	18.6094	1.60426e-05	0.0051573	up
MSTRG.4246.1	LOC108353395	0	0	2.02543	11.0185	5.75961	3.0999	18.177	2.01293e-05	0.00588576	up
MSTRG.5771.1	LOC103603131	0	0	12.6109	0	5.71382	3.07557	17.6141	2.70569e-05	0.00732344	up
MSTRG.15508.2	Armcx1	2.39063e-05	0.00294444	4.18765	8.55841	5.71097	3.08067	18.07	2.12925e-05	0.00615283	up
MSTRG.3203.5	Septin9	2.52724e-23	6.96328e-31	8.81098	2.8644	5.60413	3.00641	16.374	5.19942e-05	0.0119392	up
MSTRG.559.2	Ryr1	0.000163437	0.000265172	11.6111	2.22114e-06	5.59434	3.00325	16.2826	5.45629e-05	0.0124181	up
MSTRG.14450.3	Map4	7.76805e-05	3.46154e-05	0.000238102	11.2591	5.55099	2.9707	15.8193	6.96869e-05	0.0151882	up
MSTRG.1306.19	LOC100911413	3.26135e-20	5.84439e-05	3.36098	7.11804	5.45069	2.91276	14.9078	0.000112898	0.0213493	up
MSTRG.10868.1	MSTRG.10868	0	0	10.4601	0	5.44906	2.91523	14.7727	0.00012128	0.0227671	up
NM_001271199	Fhl1	0.000356366	1.42436e-08	0.000615476	10.0801	5.39405	2.87941	14.259	0.000159294	0.0286484	up
MSTRG.11001.1	MSTRG.11001	0	0	0	9.8059	5.35723	2.85724	13.8989	0.00019291	0.0335089	up
MSTRG.12249.1	Lamb1	0.00481357	0.0220235	0.00833368	10.855	5.35675	2.94274	14.9611	0.000109752	0.0210642	up
MSTRG.9594.1	Galk2	0	0	7.89054	1.71348	5.32845	2.84519	13.6267	0.000222988	0.0377289	up
MSTRG.11948.2	Gpr153	0.000216903	0.00258101	2.89463	6.69273	5.31004	2.84125	13.5955	0.000226726	0.0378632	up
MSTRG.14724.1	LOC120093067	0	0	2.94555	6.39278	5.28879	2.82043	13.2948	0.000266138	0.0430475	up
MSTRG.3338.1	Atp5pf	5.32261e-05	0.000159983	4.18813	5.04321	5.27141	2.81221	13.1434	0.000288527	0.0455236	up
NM_017350	Plaur	0.0830141	0.0783609	0.0789198	11.7513	4.91358	3.02461	15.0745	0.000103352	0.0204462	up
MSTRG.3980.7	Eln	9.00673e-09	3.31358	45.2496	51.1787	4.79926	5.47383	58.1801	2.39191e-14	6.15152e-11	up
MSTRG.15170.1	MSTRG.15170	0.387725	1.09364	44.3597	0.488542	4.75014	4.48764	13.3394	0.000259894	0.0423035	up
NM_031677	Fhl2	0.000450176	0.39237	6.83525	7.88158	4.58588	3.23851	17.8607	2.37682e-05	0.00679189	up
MSTRG.9040.2	Sptan1	0.251469	0.401437	0.635562	14.1671	4.10588	3.25611	16.1559	5.83372e-05	0.0131607	up
MSTRG.2367.3	Mprip	0.0289888	1.1918	11.0275	11.8533	4.02609	3.71654	24.5998	7.05602e-07	0.000432063	up
MSTRG.15075.2	Col6a3	0.654077	0.545585	0.918673	16.2909	3.64071	3.427	17.1547	3.44549e-05	0.00860302	up
MSTRG.8592.6	RT1-A1	0.687042	0.781319	19.0649	2.0072e-124	3.54217	3.54812	18.5799	1.62931e-05	0.00517318	up
MSTRG.1306.28	LOC100911413	1.89073	0.920219	24.6728	7.59565	3.4718	4.14261	20.7688	5.18193e-06	0.00220206	up
MSTRG.7004.2	Csnk2a2	0.954113	0.795056	6.93779	11.7132	3.29311	3.53477	17.007	3.72414e-05	0.00914398	up
MSTRG.9345.1	MSTRG.9345	2.42696	0	0	23.9205	3.22774	3.80175	17.7631	2.50188e-05	0.00695937	up
NM_001100509	Psmc6	1.77496	1.08158	13.0542	10.1432	2.96949	3.7986	18.8999	1.3776e-05	0.00454219	up
MSTRG.15474.3	Sh3bgrl	0.0002821	2.45028	5.59253	12.1717	2.79082	3.52984	13.6925	0.000215317	0.0369169	up
MSTRG.13161.1	MSTRG.13161	0	2.56641	0	18.2353	2.76755	3.55702	13.9066	0.000192122	0.0335089	up
MSTRG.10821.6	P3h3	3.55693	3.2449	11.7851	29.5513	2.60856	4.51978	18.9192	1.36371e-05	0.00454219	up
MSTRG.3987.5	Gtf2i	2.37271	0.976639	6.92944	13.128	2.5499	3.67722	13.887	0.000194138	0.0335089	up
NM_012762	Casp1	0.000254781	3.28436	11.637	7.6217	2.51814	3.64866	13.1609	0.000285856	0.0455236	up
NM_019164	Chad	14.5593	8.62386	58.9303	53.7012	2.33526	5.88109	22.6405	1.95319e-06	0.00100465	up
MSTRG.7182.2	Nol3	5.25331	3.69839	10.0491	29.2313	2.15458	4.51915	13.1578	0.000286328	0.0455236	up
MSTRG.8472.1	RT1-T24-4	40.1005	8.68546	100.477	96.6842	2.13772	6.69008	12.9364	0.000322251	0.0499256	up
MSTRG.285.1	Rpl17	4.89467	0.94577	13.4944	11.6652	2.11575	3.98788	13.6035	0.000225762	0.0378632	up
NM_001127547	Fbln1	17.2646	14.195	39.9076	92.6017	2.1118	6.13659	14.5565	0.000136015	0.024986	up
NR_046246_3	Rn28s	17.545	4.01075	34.3584	51.6423	2.07763	5.55235	15.4533	8.45688e-05	0.0176825	up
NM_001004202	Ccl6	5.62956	7.36695	22.9649	24.9499	1.91261	4.82131	17.7519	2.51661e-05	0.00695937	up
NM_001002805	C4b	28.5494	23.8458	98.0338	74.7486	1.77135	6.5819	12.9749	0.000315697	0.0492067	up
MSTRG.3827.1	Actb	30.3909	15.4068	8.8341	3.9803	-1.74664	4.73753	13.058	0.000301992	0.0473575	down
MSTRG.12459.4	Srsf5	25.0441	21.1058	8.72687	3.23655	-1.87133	4.74225	15.9233	6.59616e-05	0.0144991	down
MSTRG.5782.4	Ldb3	19.9748	10.603	6.6367	2.27348e-05	-2.10072	4.18351	13.9446	0.000188282	0.0331661	down
MSTRG.12184.1	MSTRG.12184	19.4888	7.64834	2.00072	3.59406	-2.16806	4.0259	13.6431	0.000221052	0.0376491	down
MSTRG.6993.2	Cdh5	22.8106	17.4845	0.00254939	8.11492	-2.22286	4.50746	17.7003	2.58589e-05	0.0070749	down
MSTRG.10138.1	MSTRG.10138	121.819	95.1498	24.4492	19.7559	-2.231	6.75804	19.7592	8.78398e-06	0.00328354	down
MSTRG.1306.31	LOC100911413	12.3937	16.0094	5.15309	0.253378	-2.29172	4.0926	15.0432	0.000105078	0.020481	down
MSTRG.10053.1	Epha4	102.493	107.089	17.2576	18.6776	-2.50327	6.68741	23.4125	1.30729e-06	0.000730888	down
NM_001107987	Myom3	11.6378	15.5327	4.18463	0.00609694	-2.57663	4.00572	17.0024	3.73325e-05	0.00914398	down
MSTRG.9966.1	MSTRG.9966	37.3394	10.9026	3.3698	3.68035	-2.63192	4.6436	18.5098	1.69034e-05	0.0052376	down
MSTRG.2452.11	Myh1	36.3108	35.4913	10.8662	0	-2.64898	5.2015	19.5173	9.96941e-06	0.00352487	down
MSTRG.12624.8	RGD1566401	12.2924	18.1203	3.93636	4.8936e-222	-2.82935	4.11403	19.8003	8.59692e-06	0.00328354	down
NM_022265	Pdcd4	9.12785	16.7841	2.00419	1.28909	-2.84413	3.93067	17.3093	3.17632e-05	0.00825137	down
MSTRG.2452.13	Myh1	68.477	23.11	10.6613	6.9769e-299	-2.9494	5.43569	16.7112	4.35232e-05	0.0103642	down
MSTRG.15522.2	Tceal7	16.9575	15.8763	3.73871	0	-2.99886	4.1753	24.7292	6.59784e-07	0.000424208	down
MSTRG.15522.1	Tceal7	27.9498	36.8165	7.6807	0	-3.00711	5.04033	25.2619	5.00509e-07	0.000357558	down
MSTRG.15522.3	Tceal7	15.6771	20.8796	4.06056	0	-3.05102	4.31107	24.8301	6.2612e-07	0.000412886	down
MSTRG.11303.1	MSTRG.11303	16.8036	0	1.69528	0	-3.07617	3.39181	13.5292	0.000234884	0.0389238	down
MSTRG.13004.2	Mrpl42	11.4355	8.44751	3.68415e-05	1.71655	-3.30372	3.57962	17.2596	3.26054e-05	0.00838545	down
MSTRG.1553.2	Pygm	23.3977	3.35919	2.06131	0.0302991	-3.42675	3.86453	17.5935	2.73519e-05	0.00732344	down
MSTRG.8444.3	Srsf11	11.1458	4.68326	1.13502	0.0022924	-3.48426	3.3271	14.6045	0.000132594	0.0245328	down
MSTRG.220.2	Thbs2	12.6407	11.9045	0.0869331	1.70127	-3.55242	3.79795	22.5603	2.03652e-06	0.00100721	down
NM_001106121	Ucma	18.4139	11.8871	1.39263	0.865225	-3.5537	4.02818	27.6341	1.46568e-07	0.000121595	down
MSTRG.6014.1	LOC102550264	7.56361	6.39238	0.869433	0	-3.61643	3.20912	13.4279	0.000247914	0.0406105	down
MSTRG.300.1	Paip2l1	28.9164	2.00206	0	2.03659	-3.62903	4.00496	15.3322	9.01653e-05	0.0187006	down
MSTRG.252.1	RGD1565566	29.6789	0	1.92185	0	-3.63786	3.95166	16.7674	4.22532e-05	0.0101558	down
NM_053894	Jdp2	3.81898	11.8418	0.275586	0.668988	-3.6901	3.33697	14.9838	0.00010844	0.0209689	down
MSTRG.813.1	MSTRG.813	18.1172	9.75472	1.82605	0	-3.70652	3.91918	26.1058	3.2321e-07	0.000251888	down
MSTRG.11283.1	LOC120102889	24.1531	1.07781	0.265575	1.13589	-3.86319	3.76751	21.6376	3.29331e-06	0.00151245	down
MSTRG.1708.8	Smarca2	16.4408	1.09438e-06	0.775482	2.27874e-08	-3.96889	3.31984	16.5331	4.78087e-05	0.0111777	down
MSTRG.12764.1	Epha4	8.91782	7.63553	0.76005	0	-4.00762	3.35781	17.1572	3.4411e-05	0.00860302	down
MSTRG.10027.3	Eef1a2	0.0861684	17.7388	0.801581	5.83557e-40	-4.05542	3.47091	18.5283	1.674e-05	0.0052376	down
MSTRG.3454.4	Abi3bp	6.07414	8.20486	0.00254585	0.585928	-4.06795	3.21853	15.1238	0.000100686	0.02023	down
MSTRG.5207.1	LOC102552091	23.1089	4.46909	0	1.14519	-4.22615	3.86101	21.9865	2.74571e-06	0.00128389	down
MSTRG.11282.1	RGD1566134	32.5067	0	1.14324	0	-4.39313	4.01983	18.2963	1.8907e-05	0.00565406	down
NM_001329883	LOC100360846	0.133349	12.2423	0.0636827	0.0785837	-4.98146	3.08534	15.0839	0.000102838	0.0204462	down
NM_030852	Mia	91.6049	0.899685	1.6239	0.631132	-5.00211	5.27805	15.1602	9.87623e-05	0.0199997	down
NM_001008839	RT1-CE16	0.881819	20.5119	1.00142e-42	0.366199	-5.09779	3.63321	25.3207	4.85469e-07	0.000356723	down
MSTRG.5163.3	Igfbp3	14.5075	56.621	0.00298694	1.89276	-5.11122	5.0895	29.6223	5.24987e-08	5.62568e-05	down
MSTRG.14725.2	Adgrf5	9.80275	0.000117906	8.93908e-06	2.15827e-08	-5.30079	2.82996	13.1498	0.000287544	0.0455236	down
MSTRG.10442.1	Aqp1	10.6411	0.0113656	0.00784634	0.0043532	-5.34593	2.89639	14.0419	0.000178783	0.0317099	down
NM_053700	Ccl28	11.5058	0.0294942	0.0299957	0	-5.35967	2.96262	14.9242	0.000111919	0.021321	down
MSTRG.4880.2	Vcsa2	10.6373	0	0	0	-5.41404	2.89424	14.1961	0.000164713	0.0294172	down
MSTRG.14399.6	Rbm5	4.7704	5.8765	7.54478e-07	9.16973e-09	-5.41889	2.92237	14.334	0.000153078	0.0277244	down
MSTRG.13004.3	Mrpl42	6.35427	4.31257	2.53512e-05	5.00691e-05	-5.42092	2.91655	14.3608	0.000150908	0.0275251	down
MSTRG.13278.2	Ptp4a3	11.0683	6.08424e-11	1.5532e-09	5.19893e-10	-5.46902	2.92631	14.7278	0.0001242	0.0231463	down
NM_001134587	Snorc	34.9021	0.14191	0.0959601	0.356903	-5.48403	4.0788	20.0498	7.54533e-06	0.00303205	down
MSTRG.8812.1	Ppa1	6.47451	4.7005	0	1.26106e-68	-5.48699	2.95588	15.0424	0.000105121	0.020481	down
MSTRG.11280.9	LOC259244	11.4274	1.30182e-24	2.88713e-85	7.89357e-41	-5.51322	2.95247	15.168	9.83586e-05	0.0199997	down
MSTRG.11280.7	LOC259244	11.4913	7.99182e-20	7.47434e-45	7.90386e-20	-5.52094	2.95707	15.2461	9.43723e-05	0.0194165	down
MSTRG.9798.2	Chmp4b	43.385	0.754299	1.41261e-05	0.601623	-5.5221	4.34877	16.6222	4.56148e-05	0.0107626	down
MSTRG.3338.4	Atp5pf	5.45308	6.11094	0.00202008	0.000248292	-5.52213	2.99061	15.5254	8.14039e-05	0.0171602	down
MSTRG.1306.14	Dmbt1	8.0775	11.8738	0.0856437	0.0914046	-5.52474	3.51974	25.1153	5.40016e-07	0.000365477	down
MSTRG.12448.1	MSTRG.12448	11.4888	0.286986	0	0	-5.55513	2.9787	15.5946	7.84764e-05	0.0168188	down
MSTRG.3384.1	Kcne1	11.8146	1.29227e-05	0	0	-5.55938	2.98014	15.6409	7.65817e-05	0.0165507	down
MSTRG.10027.1	Eef1a2	4.60519	7.28543	8.54592e-05	0.000126612	-5.57384	3.01895	15.9815	6.3963e-05	0.014181	down
NM_012863	Bhlha15	15.5955	0.0587788	0.049962	0.0212158	-5.58681	3.2328	19.7105	9.01026e-06	0.00331037	down
MSTRG.1891.1	Sfr1	12.7514	9.5872e-06	8.59973e-06	8.02259e-06	-5.66524	3.04487	16.7853	4.18566e-05	0.0101554	down
MSTRG.15157.1	MSTRG.15157	0	12.9509	0	0	-5.7069	3.11709	17.1772	3.40494e-05	0.00860302	down
MSTRG.12308.1	LOC120093335	0.913733	12.3527	0	0	-5.73982	3.13504	17.5749	2.76217e-05	0.00732344	down
MSTRG.1306.32	LOC100911413	6.49102	7.02237	1.0402e-180	2.26872e-97	-5.75727	3.12689	17.8178	2.43103e-05	0.00687047	down
NM_001004084	RT1-Bb	2.48878e-07	14.4277	2.79632e-07	4.16173e-07	-5.86009	3.21792	19.1286	1.22202e-05	0.004247	down
NM_001106058	Cldn10	48.0418	0.208966	0.121433	0.354699	-5.87124	4.44803	16.0707	6.10218e-05	0.0136466	down
MSTRG.11285.1	LOC120102889	14.9083	0	0	0	-5.88477	3.18331	19.5104	1.00053e-05	0.00352487	down
NM_173148	Obp2b	16.2718	0	0	0	-6.00997	3.26417	21.3581	3.81002e-06	0.00168942	down
MSTRG.12623.1	LOC102555254	17.6247	0	0	0	-6.12597	3.33998	23.3078	1.38042e-06	0.000755357	down
MSTRG.13694.1	Casp1	12.4386	5.43192	0.000391181	0.000420051	-6.14745	3.37639	24.0702	9.28853e-07	0.00055554	down
MSTRG.13828.4	Aplp2	0.000683587	23.6324	0.00899434	0.0764862	-6.15255	3.73203	29.2321	6.42062e-08	6.14404e-05	down
MSTRG.591.1	Capns1	20.3399	0.0174707	0.0192748	0.00607028	-6.1956	3.48287	27.0722	1.95998e-07	0.000157521	down
NM_001114405	Ptp4a3	20.709	0.000467578	0.000365536	0.000417026	-6.35754	3.49874	27.8971	1.27941e-07	0.000109679	down
MSTRG.2304.1	Slc22a4	4.45561	17.3709	0	0	-6.44134	3.62252	29.1119	6.83148e-08	6.27471e-05	down
MSTRG.2997.1	Vat1	22.4721	4.0216e-10	9.58179e-16	5.63947e-08	-6.47677	3.58182	30.1309	4.03847e-08	4.51571e-05	down
MSTRG.3535.3	Mylk	6.26881e-16	22.2602	1.66326e-05	1.98865e-05	-6.47884	3.66224	29.4172	5.83576e-08	6.00337e-05	down
MSTRG.10208.1	Lrrgt00014	22.72	0	0	0	-6.4916	3.59312	30.3908	3.53192e-08	4.12882e-05	down
MSTRG.4248.1	MSTRG.4248	20.7369	3.16531	0	0	-6.55902	3.65824	31.2448	2.27454e-08	3.24981e-05	down
MSTRG.1106.2	LOC120099906	4.30617e-05	24.1055	3.19777e-05	2.66452e-05	-6.61848	3.7502	30.4537	3.41924e-08	4.12882e-05	down
MSTRG.10137.1	Cast	38.6892	29.4937	0.286157	0.121664	-6.65455	4.94259	68.5094	1.26276e-16	1.62378e-12	down
MSTRG.8519.1	RT1-CE16	3.5994e-154	155.012	1.37139	2.1011e-137	-6.70687	6.17642	15.5636	7.97737e-05	0.0169555	down
NM_012779	Aqp5	99.5441	0.772287	0.301046	0.215656	-6.83392	5.35514	19.7536	8.80955e-06	0.00328354	down
MSTRG.4028.5	Ubc	46.2338	9.04257e-07	5.75554e-07	0.10662	-6.84403	4.38696	17.3244	3.15118e-05	0.00825137	down
MSTRG.8592.2	RT1-A3	0.528794	56.6154	2.84356e-31	0.284379	-6.87796	4.80816	18.1761	2.01395e-05	0.00588576	down
NM_138518	Crispld2	20.9466	12.286	0.00158013	0.000219824	-7.02664	4.04702	44.3211	2.78689e-11	5.97277e-08	down
NM_147212	LOC259244	36.3093	0.582405	2.96026e-48	1.38584e-19	-7.06312	4.12326	22.1053	2.5809e-06	0.00122918	down
MSTRG.12934.1	MSTRG.12934	13.3668	21.7136	0	0	-7.13523	4.14036	41.3126	1.2973e-10	2.38314e-07	down
MSTRG.4767.2	Rpl5	41.7285	6.93465e-06	5.8596e-06	5.83465e-06	-7.22077	4.26351	18.3512	1.83702e-05	0.00555819	down
MSTRG.9406.1	MSTRG.9406	24.1904	23.381	0	0	-7.55606	4.49109	58.5137	2.0188e-14	5.76882e-11	down
MSTRG.9999.1	MSTRG.9999	34.671	19.6486	0	0	-7.7332	4.63527	62.1689	3.1523e-15	1.01339e-11	down
MSTRG.10978.1	Epha4	35.5926	23.2316	0	0	-7.84982	4.74041	62.3233	2.91453e-15	1.01339e-11	down
MSTRG.4394.5	Tnni1	9.61698e-08	65.5198	3.90908e-06	1.84315e-38	-8.1899	4.98361	19.0047	1.30394e-05	0.00442827	down
NM_019292	Ca3	180.908	47.7771	0.00245344	0.139973	-9.07118	6.5012	62.9022	2.17226e-15	1.01339e-11	down
MSTRG.12740.1	Rpl41	8.13708e-06	165.804	9.5516e-06	7.84209e-06	-9.53184	6.25936	20.9199	4.78889e-06	0.00208747	down
MSTRG.10866.1	A2ml1	256.892	0.208687	0.00734289	0	-9.77447	6.60042	22.589	2.0063e-06	0.00100721	down
NM_198729	Vcsa2	399.237	0	0	0	-10.4501	7.20696	20.7313	5.28441e-06	0.00220206	down
NM_022708	Pip	850.612	0	0.10827	0	-11.0113	8.26897	19.8056	8.57302e-06	0.00328354	down
NM_133513	Oprpn	3665.25	0.589529	0	0	-13.647	10.3546	18.6824	1.54401e-05	0.00502643	down
NM_133622	Csap1	25340.8	34.5018	0.0973134	0	-15.9548	13.1404	19.7826	8.67711e-06	0.00328354	down
NM_012684	Smr3b	71497.2	0.414345	0.167224	0	-17.1788	14.6336	13.5195	0.000236104	0.0389238	down

## Sheet: S4
Table S4. Gene Ontology analysis of upregulated genes in injured urethral tissues. Terms with FDR values smaller than 0.05 were regarded as statistically significant enriched. Statistical test method: hypergeometric test / Fisher's exact test. FDR correction method: Benjamini and Hochberg.
Term	Database	ID	Ontology	Input number	Background number	P-Value	Corrected P-Value	Input	Hyperlink
extracellular space	Gene Ontology	GO:0005615	CC	14	1407	1.67642e-07	0.000137466	MSTRG.1306.19|NM_001127547|NM_001004202|MSTRG.880.3|MSTRG.15075.2|MSTRG.12249.1|MSTRG.5163.2|MSTRG.3338.1|MSTRG.1306.28|MSTRG.3341.2|MSTRG.14166.1|NM_019164|MSTRG.13216.2|MSTRG.8592.6	http://amigo.geneontology.org/amigo/term/GO:0005615
stress fiber	Gene Ontology	GO:0001725	CC	5	85	6.24288e-07	0.000255958	MSTRG.2367.3|MSTRG.3535.6|NM_001034073|NM_001301736|MSTRG.3203.5	http://amigo.geneontology.org/amigo/term/GO:0001725
cytoplasm	Gene Ontology	GO:0005737	CC	23	5024	9.74968e-06	0.00179537	MSTRG.4612.2|MSTRG.4795.2|MSTRG.9367.3|MSTRG.3341.2|MSTRG.3535.6|MSTRG.559.2|MSTRG.13594.4|MSTRG.14166.1|MSTRG.1306.28|MSTRG.2367.3|MSTRG.880.3|NM_001034073|MSTRG.7182.2|MSTRG.14450.3|NM_001271199|MSTRG.1306.19|NM_001106848|MSTRG.2901.2|MSTRG.3987.5|NM_001105841|MSTRG.7004.2|NM_001301736|NM_012762	http://amigo.geneontology.org/amigo/term/GO:0005737
extracellular matrix	Gene Ontology	GO:0031012	CC	6	266	9.68563e-06	0.00179537	MSTRG.1306.19|NM_001127547|MSTRG.1306.28|MSTRG.15075.2|MSTRG.12249.1|NM_019164	http://amigo.geneontology.org/amigo/term/GO:0031012
negative regulation of cytosolic calcium ion concentration	Gene Ontology	GO:0051481	BP	3	21	1.09474e-05	0.00179537	MSTRG.3987.5|MSTRG.4612.2|MSTRG.7182.2	http://amigo.geneontology.org/amigo/term/GO:0051481
cortical cytoskeleton	Gene Ontology	GO:0030863	CC	3	30	2.91719e-05	0.00398683	MSTRG.9040.2|NM_001034073|NM_001301736	http://amigo.geneontology.org/amigo/term/GO:0030863
actin filament binding	Gene Ontology	GO:0051015	MF	5	207	4.0886e-05	0.0047895	MSTRG.2367.3|MSTRG.14166.1|NM_001034073|NM_001301736|MSTRG.2901.2	http://amigo.geneontology.org/amigo/term/GO:0051015
actin cytoskeleton	Gene Ontology	GO:0015629	CC	5	227	6.26927e-05	0.005712	MSTRG.2367.3|MSTRG.3535.6|NM_001034073|NM_001301736|MSTRG.3203.5	http://amigo.geneontology.org/amigo/term/GO:0015629
sarcolemma	Gene Ontology	GO:0042383	CC	4	130	0.000102498	0.00700401	MSTRG.14166.1|MSTRG.4612.2|MSTRG.559.2|MSTRG.15075.2	http://amigo.geneontology.org/amigo/term/GO:0042383
collagen-containing extracellular matrix	Gene Ontology	GO:0062023	CC	4	130	0.000102498	0.00700401	MSTRG.1306.28|MSTRG.1306.19|MSTRG.13216.2|MSTRG.12249.1	http://amigo.geneontology.org/amigo/term/GO:0062023
lipoteichoic acid binding	Gene Ontology	GO:0070891	MF	2	6	8.87489e-05	0.00700401	MSTRG.1306.28|MSTRG.1306.19	http://amigo.geneontology.org/amigo/term/GO:0070891
induction of bacterial agglutination	Gene Ontology	GO:0043152	BP	2	7	0.000113973	0.00718909	MSTRG.1306.28|MSTRG.1306.19	http://amigo.geneontology.org/amigo/term/GO:0043152
muscle contraction	Gene Ontology	GO:0006936	BP	3	54	0.000151712	0.00829359	NM_001034073|MSTRG.559.2|NM_001301736	http://amigo.geneontology.org/amigo/term/GO:0006936
release of sequestered calcium ion into cytosol by sarcoplasmic reticulum	Gene Ontology	GO:0014808	BP	2	8	0.000142301	0.00829359	MSTRG.559.2|MSTRG.7182.2	http://amigo.geneontology.org/amigo/term/GO:0014808
peptidase activator activity	Gene Ontology	GO:0016504	MF	2	9	0.000173722	0.00837955	NM_001127547|MSTRG.3341.2	http://amigo.geneontology.org/amigo/term/GO:0016504
positive regulation of epithelial cell differentiation	Gene Ontology	GO:0030858	BP	2	9	0.000173722	0.00837955	MSTRG.1306.28|MSTRG.1306.19	http://amigo.geneontology.org/amigo/term/GO:0030858
protein binding	Gene Ontology	GO:0005515	MF	11	1713	0.000225654	0.0102798	MSTRG.13594.4|NM_031677|MSTRG.8592.6|NM_001105841|MSTRG.4612.2|MSTRG.5163.2|MSTRG.7182.2|MSTRG.3341.2|MSTRG.9040.2|MSTRG.559.2|NM_012762	http://amigo.geneontology.org/amigo/term/GO:0005515
membrane raft	Gene Ontology	GO:0045121	CC	5	310	0.00026118	0.011272	MSTRG.14166.1|NM_001105841|MSTRG.13594.4|MSTRG.3341.2|MSTRG.8592.6	http://amigo.geneontology.org/amigo/term/GO:0045121
molecular_function	Gene Ontology	GO:0003674	MF	13	2453	0.000368507	0.0114447	MSTRG.4580.2|MSTRG.2367.3|MSTRG.10821.6|MSTRG.1306.19|NM_001127547|MSTRG.1306.28|MSTRG.3203.5|MSTRG.15075.2|MSTRG.12249.1|MSTRG.7004.2|MSTRG.3987.5|MSTRG.7376.2|NM_001301736	http://amigo.geneontology.org/amigo/term/GO:0003674
microtubule cytoskeleton	Gene Ontology	GO:0015630	CC	4	182	0.000359458	0.0114447	MSTRG.9040.2|MSTRG.3203.5|MSTRG.14450.3|MSTRG.13594.4	http://amigo.geneontology.org/amigo/term/GO:0015630
pattern recognition receptor activity	Gene Ontology	GO:0038187	MF	2	13	0.000330117	0.0114447	MSTRG.1306.28|MSTRG.1306.19	http://amigo.geneontology.org/amigo/term/GO:0038187
zymogen granule membrane	Gene Ontology	GO:0042589	CC	2	14	0.000376839	0.0114447	MSTRG.1306.28|MSTRG.1306.19	http://amigo.geneontology.org/amigo/term/GO:0042589
identical protein binding	Gene Ontology	GO:0042802	MF	11	1799	0.000342712	0.0114447	MSTRG.13594.4|NM_031677|NM_001127547|MSTRG.14166.1|NM_001105841|MSTRG.9367.3|NM_001034073|MSTRG.7182.2|MSTRG.3341.2|NM_001100509|NM_012762	http://amigo.geneontology.org/amigo/term/GO:0042802
rRNA transcription	Gene Ontology	GO:0009303	BP	2	15	0.00042659	0.0117264	NR_046246_3|NM_001105841	http://amigo.geneontology.org/amigo/term/GO:0009303
positive regulation of membrane protein ectodomain proteolysis	Gene Ontology	GO:0051044	BP	2	16	0.000479357	0.0118351	MSTRG.9367.3|MSTRG.3341.2	http://amigo.geneontology.org/amigo/term/GO:0051044
inner cell mass cell proliferation	Gene Ontology	GO:0001833	BP	2	18	0.000593902	0.013436	MSTRG.1306.28|MSTRG.1306.19	http://amigo.geneontology.org/amigo/term/GO:0001833
cytosolic large ribosomal subunit	Gene Ontology	GO:0022625	CC	3	91	0.000662917	0.0139383	MSTRG.7376.2|MSTRG.3544.2|MSTRG.285.1	http://amigo.geneontology.org/amigo/term/GO:0022625
antimicrobial humoral immune response mediated by antimicrobial peptide	Gene Ontology	GO:0061844	BP	3	94	0.000726381	0.0145276	MSTRG.1306.28|MSTRG.1306.19|MSTRG.3341.2	http://amigo.geneontology.org/amigo/term/GO:0061844
defense response to Gram-negative bacterium	Gene Ontology	GO:0050829	BP	3	102	0.000914167	0.0170367	MSTRG.1306.28|MSTRG.1306.19|MSTRG.3341.2	http://amigo.geneontology.org/amigo/term/GO:0050829
positive regulation of protein phosphorylation	Gene Ontology	GO:0001934	BP	4	242	0.00102328	0.0177451	MSTRG.2367.3|MSTRG.14166.1|NM_017350|MSTRG.3341.2	http://amigo.geneontology.org/amigo/term/GO:0001934
transport vesicle membrane	Gene Ontology	GO:0030658	CC	2	24	0.00100885	0.0177451	MSTRG.1306.28|MSTRG.1306.19	http://amigo.geneontology.org/amigo/term/GO:0030658
basement membrane	Gene Ontology	GO:0005604	CC	3	112	0.0011888	0.0191858	MSTRG.14166.1|MSTRG.12249.1|NM_001127547	http://amigo.geneontology.org/amigo/term/GO:0005604
enzyme binding	Gene Ontology	GO:0019899	MF	5	436	0.00119326	0.0191858	MSTRG.559.2|MSTRG.3535.6|NM_017350|MSTRG.12249.1|MSTRG.3341.2	http://amigo.geneontology.org/amigo/term/GO:0019899
phagocytic vesicle membrane	Gene Ontology	GO:0030670	CC	2	26	0.00117066	0.0191858	MSTRG.1306.28|MSTRG.1306.19	http://amigo.geneontology.org/amigo/term/GO:0030670
podosome	Gene Ontology	GO:0002102	CC	2	29	0.0014351	0.0222034	NM_001034073|NM_001301736	http://amigo.geneontology.org/amigo/term/GO:0002102
negative regulation of intrinsic apoptotic signaling pathway	Gene Ontology	GO:2001243	BP	2	29	0.0014351	0.0222034	NM_017350|MSTRG.7182.2	http://amigo.geneontology.org/amigo/term/GO:2001243
lipopolysaccharide binding	Gene Ontology	GO:0001530	MF	2	32	0.00172538	0.0231936	MSTRG.1306.28|MSTRG.1306.19	http://amigo.geneontology.org/amigo/term/GO:0001530
response to hypoxia	Gene Ontology	GO:0001666	BP	4	279	0.0017115	0.0231936	MSTRG.559.2|MSTRG.5163.2|MSTRG.7182.2|NM_012762	http://amigo.geneontology.org/amigo/term/GO:0001666
microglial cell activation	Gene Ontology	GO:0001774	BP	2	32	0.00172538	0.0231936	MSTRG.3341.2|NM_012762	http://amigo.geneontology.org/amigo/term/GO:0001774
blastocyst development	Gene Ontology	GO:0001824	BP	2	32	0.00172538	0.0231936	MSTRG.1306.28|MSTRG.1306.19	http://amigo.geneontology.org/amigo/term/GO:0001824
smooth endoplasmic reticulum	Gene Ontology	GO:0005790	CC	2	32	0.00172538	0.0231936	MSTRG.559.2|MSTRG.3341.2	http://amigo.geneontology.org/amigo/term/GO:0005790
actin filament organization	Gene Ontology	GO:0007015	BP	3	127	0.00168994	0.0231936	MSTRG.2367.3|NM_001034073|NM_001301736	http://amigo.geneontology.org/amigo/term/GO:0007015
response to auditory stimulus	Gene Ontology	GO:0010996	BP	2	31	0.00162577	0.0231936	MSTRG.4612.2|MSTRG.3341.2	http://amigo.geneontology.org/amigo/term/GO:0010996
extracellular matrix binding	Gene Ontology	GO:0050840	MF	2	31	0.00162577	0.0231936	MSTRG.1306.28|MSTRG.1306.19	http://amigo.geneontology.org/amigo/term/GO:0050840
fibronectin binding	Gene Ontology	GO:0001968	MF	2	33	0.00182783	0.023984	NM_001127547|MSTRG.5163.2	http://amigo.geneontology.org/amigo/term/GO:0001968
Z disc	Gene Ontology	GO:0030018	CC	3	131	0.00184267	0.023984	MSTRG.9040.2|MSTRG.559.2|NM_031677	http://amigo.geneontology.org/amigo/term/GO:0030018
defense response to Gram-positive bacterium	Gene Ontology	GO:0050830	BP	3	132	0.00188215	0.0241151	MSTRG.1306.28|MSTRG.1306.19|MSTRG.3341.2	http://amigo.geneontology.org/amigo/term/GO:0050830
integrin binding	Gene Ontology	GO:0005178	MF	3	134	0.00196269	0.0247601	MSTRG.12249.1|MSTRG.3341.2|NM_001127547	http://amigo.geneontology.org/amigo/term/GO:0005178
tissue regeneration	Gene Ontology	GO:0042246	BP	2	36	0.00215213	0.0267386	MSTRG.1306.28|MSTRG.1306.19	http://amigo.geneontology.org/amigo/term/GO:0042246
neuron projection	Gene Ontology	GO:0043005	CC	5	514	0.00243025	0.0297433	MSTRG.4612.2|NM_001301736|MSTRG.14450.3|MSTRG.3341.2|NM_012762	http://amigo.geneontology.org/amigo/term/GO:0043005
endosome	Gene Ontology	GO:0005768	CC	4	310	0.00249425	0.0300777	MSTRG.14166.1|MSTRG.4612.2|MSTRG.9367.3|MSTRG.3341.2	http://amigo.geneontology.org/amigo/term/GO:0005768
myelin sheath	Gene Ontology	GO:0043209	CC	2	44	0.00313934	0.0367751	MSTRG.4580.2|MSTRG.13594.4	http://amigo.geneontology.org/amigo/term/GO:0043209
scavenger receptor activity	Gene Ontology	GO:0005044	MF	2	46	0.00341353	0.0394239	MSTRG.1306.28|MSTRG.1306.19	http://amigo.geneontology.org/amigo/term/GO:0005044
ATP metabolic process	Gene Ontology	GO:0046034	BP	2	47	0.00355468	0.0404839	MSTRG.4612.2|MSTRG.3338.1	http://amigo.geneontology.org/amigo/term/GO:0046034
neuron projection development	Gene Ontology	GO:0031175	BP	3	169	0.00373172	0.0413515	MSTRG.14450.3|MSTRG.3341.2|MSTRG.12249.1	http://amigo.geneontology.org/amigo/term/GO:0031175
negative regulation of apoptotic process	Gene Ontology	GO:0043066	BP	5	568	0.00371045	0.0413515	MSTRG.4580.2|MSTRG.7182.2|NM_017350|NM_031677|NM_001106848	http://amigo.geneontology.org/amigo/term/GO:0043066
defense response	Gene Ontology	GO:0006952	BP	2	49	0.00384504	0.041486	MSTRG.1306.28|MSTRG.1306.19	http://amigo.geneontology.org/amigo/term/GO:0006952
cleavage furrow	Gene Ontology	GO:0032154	CC	2	49	0.00384504	0.041486	MSTRG.3535.6|NM_001301736	http://amigo.geneontology.org/amigo/term/GO:0032154
negative regulation of cell adhesion	Gene Ontology	GO:0007162	BP	2	51	0.00414608	0.043587	MSTRG.12249.1|NM_001127547	http://amigo.geneontology.org/amigo/term/GO:0007162
sarcoplasmic reticulum	Gene Ontology	GO:0016529	CC	2	53	0.00445772	0.0445772	MSTRG.559.2|MSTRG.7182.2	http://amigo.geneontology.org/amigo/term/GO:0016529
collagen fibril organization	Gene Ontology	GO:0030199	BP	2	52	0.00430058	0.0445772	MSTRG.14166.1|MSTRG.13216.2	http://amigo.geneontology.org/amigo/term/GO:0030199
protein-containing complex	Gene Ontology	GO:0032991	CC	6	853	0.00442893	0.0445772	MSTRG.14166.1|NM_001105841|MSTRG.3341.2|MSTRG.9040.2|MSTRG.559.2|NM_012762	http://amigo.geneontology.org/amigo/term/GO:0032991
positive regulation of interleukin-1 beta production	Gene Ontology	GO:0032731	BP	2	54	0.00461749	0.0456185	MSTRG.3341.2|NM_012762	http://amigo.geneontology.org/amigo/term/GO:0032731
signaling receptor binding	Gene Ontology	GO:0005102	MF	4	371	0.00469351	0.0458176	MSTRG.3341.2|NM_017350|MSTRG.8592.6|MSTRG.7182.2	http://amigo.geneontology.org/amigo/term/GO:0005102
calcium channel activity	Gene Ontology	GO:0005262	MF	2	56	0.00494488	0.0477036	MSTRG.14166.1|MSTRG.559.2	http://amigo.geneontology.org/amigo/term/GO:0005262

## Sheet: S5
Table S5. KEGG pathway analysis of upregulated genes in injured urethral tissues. Pathways with FDR values smaller than 0.05 were regarded as statistically significant enriched. Statistical test method: hypergeometric test / Fisher's exact test. FDR correction method: Benjamini and Hochberg.
Term	Database	ID	Input number	Background number	P-Value	Corrected P-Value	Input	Hyperlink
Human papillomavirus infection	KEGG PATHWAY	rno05165	6	360	5.11925e-05	0.00524723	MSTRG.8592.6|MSTRG.15075.2|MSTRG.12249.1|MSTRG.8519.8|MSTRG.8519.5|NM_019164	http://www.genome.jp/kegg-bin/show_pathway?rno05165/rno:298941%09red/rno:414790%09red/rno:414791%09red/rno:24974%09red/rno:367313%09red/rno:29195%09red
Graft-versus-host disease	KEGG PATHWAY	rno05332	3	71	0.000328883	0.0114447	MSTRG.8519.5|MSTRG.8519.8|MSTRG.8592.6	http://www.genome.jp/kegg-bin/show_pathway?rno05332/rno:414790%09red/rno:414791%09red/rno:24974%09red
Cell adhesion molecules (CAMs)	KEGG PATHWAY	rno04514	4	178	0.00033105	0.0114447	MSTRG.4580.2|MSTRG.8519.5|MSTRG.8519.8|MSTRG.8592.6	http://www.genome.jp/kegg-bin/show_pathway?rno04514/rno:24564%09red/rno:414790%09red/rno:414791%09red/rno:24974%09red
Allograft rejection	KEGG PATHWAY	rno05330	3	74	0.000369704	0.0114447	MSTRG.8519.5|MSTRG.8519.8|MSTRG.8592.6	http://www.genome.jp/kegg-bin/show_pathway?rno05330/rno:414790%09red/rno:414791%09red/rno:24974%09red
Cellular senescence	KEGG PATHWAY	rno04218	4	189	0.000413311	0.0117264	MSTRG.8519.5|MSTRG.8519.8|MSTRG.8592.6|MSTRG.5163.2	http://www.genome.jp/kegg-bin/show_pathway?rno04218/rno:24484%09red/rno:414790%09red/rno:414791%09red/rno:24974%09red
Salivary secretion	KEGG PATHWAY	rno04970	3	78	0.000429014	0.0117264	MSTRG.1306.28|MSTRG.4612.2|MSTRG.1306.19	http://www.genome.jp/kegg-bin/show_pathway?rno04970/rno:24212%09red/rno:170568%09red
Type I diabetes mellitus	KEGG PATHWAY	rno04940	3	80	0.000460826	0.0118351	MSTRG.8519.5|MSTRG.8519.8|MSTRG.8592.6	http://www.genome.jp/kegg-bin/show_pathway?rno04940/rno:414790%09red/rno:414791%09red/rno:24974%09red
Autoimmune thyroid disease	KEGG PATHWAY	rno05320	3	81	0.000477284	0.0118351	MSTRG.8519.5|MSTRG.8519.8|MSTRG.8592.6	http://www.genome.jp/kegg-bin/show_pathway?rno05320/rno:414790%09red/rno:414791%09red/rno:24974%09red
Phagosome	KEGG PATHWAY	rno04145	4	198	0.000490726	0.0118351	MSTRG.8519.5|MSTRG.13594.4|MSTRG.8519.8|MSTRG.8592.6	http://www.genome.jp/kegg-bin/show_pathway?rno04145/rno:414790%09red/rno:64158%09red/rno:414791%09red/rno:24974%09red
Focal adhesion	KEGG PATHWAY	rno04510	4	203	0.000537934	0.012603	MSTRG.3535.6|NM_019164|MSTRG.15075.2|MSTRG.12249.1	http://www.genome.jp/kegg-bin/show_pathway?rno04510/rno:298941%09red/rno:288057%09red/rno:367313%09red/rno:29195%09red
Cardiac muscle contraction	KEGG PATHWAY	rno04260	3	89	0.000622646	0.013436	MSTRG.4612.2|NM_001034073|NM_001301736	http://www.genome.jp/kegg-bin/show_pathway?rno04260/rno:117557%09red/rno:24212%09red/rno:24852%09red
ECM-receptor interaction	KEGG PATHWAY	rno04512	3	89	0.000622646	0.013436	NM_019164|MSTRG.15075.2|MSTRG.12249.1	http://www.genome.jp/kegg-bin/show_pathway?rno04512/rno:298941%09red/rno:367313%09red/rno:29195%09red
Protein digestion and absorption	KEGG PATHWAY	rno04974	3	94	0.000726381	0.0145276	MSTRG.4612.2|MSTRG.15075.2|MSTRG.13216.2	http://www.genome.jp/kegg-bin/show_pathway?rno04974/rno:367313%09red/rno:24212%09red/rno:314981%09red
Viral myocarditis	KEGG PATHWAY	rno05416	3	97	0.000793591	0.0154939	MSTRG.8519.5|MSTRG.8519.8|MSTRG.8592.6	http://www.genome.jp/kegg-bin/show_pathway?rno05416/rno:414790%09red/rno:414791%09red/rno:24974%09red
Antigen processing and presentation	KEGG PATHWAY	rno04612	3	101	0.000889181	0.0169565	MSTRG.8519.5|MSTRG.8519.8|MSTRG.8592.6	http://www.genome.jp/kegg-bin/show_pathway?rno04612/rno:414790%09red/rno:414791%09red/rno:24974%09red
Epstein-Barr virus infection	KEGG PATHWAY	rno05169	4	237	0.000948412	0.0172822	NM_001100509|MSTRG.8519.8|MSTRG.8592.6|MSTRG.8519.5	http://www.genome.jp/kegg-bin/show_pathway?rno05169/rno:289990%09red/rno:414790%09red/rno:414791%09red/rno:24974%09red
Human immunodeficiency virus 1 infection	KEGG PATHWAY	rno05170	4	243	0.00103874	0.0177451	MSTRG.8519.5|MSTRG.8519.8|MSTRG.8592.6|NM_001106848	http://www.genome.jp/kegg-bin/show_pathway?rno05170/rno:414790%09red/rno:414791%09red/rno:24974%09red/rno:300948%09red
Adrenergic signaling in cardiomyocytes	KEGG PATHWAY	rno04261	3	149	0.00263563	0.0313219	MSTRG.4612.2|NM_001034073|NM_001301736	http://www.genome.jp/kegg-bin/show_pathway?rno04261/rno:117557%09red/rno:24212%09red/rno:24852%09red
cGMP-PKG signaling pathway	KEGG PATHWAY	rno04022	3	173	0.00397951	0.0423792	MSTRG.3535.6|MSTRG.4612.2|MSTRG.3987.5	http://www.genome.jp/kegg-bin/show_pathway?rno04022/rno:353256%09red/rno:288057%09red/rno:24212%09red
Ribosome	KEGG PATHWAY	rno03010	3	179	0.00436964	0.0445772	MSTRG.7376.2|MSTRG.3544.2|MSTRG.285.1	http://www.genome.jp/kegg-bin/show_pathway?rno03010/rno:291434%09red/rno:57809%09red/rno:81765%09red

## Sheet: S6
Table S6. Gene Ontology analysis of downregulated genes in injured urethral tissues. Terms with FDR values smaller than 0.05 were regarded as statistically significant enriched. Statistical test method: hypergeometric test / Fisher's exact test. FDR correction method: Benjamini and Hochberg.
Term	Database	ID	Ontology	Input number	Background number	P-Value	Corrected P-Value	Input	Hyperlink
endopeptidase inhibitor activity	Gene Ontology	GO:0004866	MF	5	29	1.88781e-08	1.34035e-05	MSTRG.4880.2|NM_012684|NM_133513|MSTRG.10866.1|NM_198729	http://amigo.geneontology.org/amigo/term/GO:0004866
lipoteichoic acid binding	Gene Ontology	GO:0070891	MF	3	6	1.12151e-06	0.000265425	MSTRG.1306.14|MSTRG.1306.31|MSTRG.1306.32	http://amigo.geneontology.org/amigo/term/GO:0070891
synaptic signaling	Gene Ontology	GO:0099536	BP	3	5	7.48978e-07	0.000265425	MSTRG.5207.1|MSTRG.300.1|MSTRG.12184.1	http://amigo.geneontology.org/amigo/term/GO:0099536
small molecule binding	Gene Ontology	GO:0036094	MF	4	33	1.94584e-06	0.000276309	MSTRG.11280.9|NM_147212|NM_173148|MSTRG.11280.7	http://amigo.geneontology.org/amigo/term/GO:0036094
induction of bacterial agglutination	Gene Ontology	GO:0043152	BP	3	7	1.59937e-06	0.000276309	MSTRG.1306.14|MSTRG.1306.31|MSTRG.1306.32	http://amigo.geneontology.org/amigo/term/GO:0043152
positive regulation of epithelial cell differentiation	Gene Ontology	GO:0030858	BP	3	9	2.922e-06	0.00034577	MSTRG.1306.14|MSTRG.1306.31|MSTRG.1306.32	http://amigo.geneontology.org/amigo/term/GO:0030858
kinocilium	Gene Ontology	GO:0060091	CC	3	10	3.792e-06	0.000384617	MSTRG.5207.1|MSTRG.300.1|MSTRG.12184.1	http://amigo.geneontology.org/amigo/term/GO:0060091
extracellular matrix	Gene Ontology	GO:0031012	CC	7	266	4.48661e-06	0.000392271	NM_001106121|MSTRG.220.2|MSTRG.1306.32|NM_138518|MSTRG.1306.31|MSTRG.3454.4|MSTRG.1306.14	http://amigo.geneontology.org/amigo/term/GO:0031012
negative regulation of endopeptidase activity	Gene Ontology	GO:0010951	BP	6	180	6.08466e-06	0.000392737	MSTRG.13828.4|NM_133513|MSTRG.4880.2|NM_012684|NM_198729|MSTRG.10866.1	http://amigo.geneontology.org/amigo/term/GO:0010951
pattern recognition receptor activity	Gene Ontology	GO:0038187	MF	3	13	7.38624e-06	0.000437019	MSTRG.1306.14|MSTRG.1306.31|MSTRG.1306.32	http://amigo.geneontology.org/amigo/term/GO:0038187
zymogen granule membrane	Gene Ontology	GO:0042589	CC	3	14	8.95342e-06	0.000454066	MSTRG.1306.14|MSTRG.1306.31|MSTRG.1306.32	http://amigo.geneontology.org/amigo/term/GO:0042589
regulation of sensory perception of pain	Gene Ontology	GO:0051930	BP	4	49	8.37845e-06	0.000454066	MSTRG.4880.2|NM_012684|NM_133513|NM_198729	http://amigo.geneontology.org/amigo/term/GO:0051930
muscle contraction	Gene Ontology	GO:0006936	BP	4	54	1.20289e-05	0.000533784	MSTRG.2452.13|NM_001107987|MSTRG.2452.11|MSTRG.4394.5	http://amigo.geneontology.org/amigo/term/GO:0006936
inner cell mass cell proliferation	Gene Ontology	GO:0001833	BP	3	18	1.73904e-05	0.000726307	MSTRG.1306.14|MSTRG.1306.31|MSTRG.1306.32	http://amigo.geneontology.org/amigo/term/GO:0001833
collagen-containing extracellular matrix	Gene Ontology	GO:0062023	CC	5	130	1.9454e-05	0.000767352	MSTRG.220.2|MSTRG.1306.14|MSTRG.1306.31|NM_001134587|MSTRG.1306.32	http://amigo.geneontology.org/amigo/term/GO:0062023
transport vesicle membrane	Gene Ontology	GO:0030658	CC	3	24	3.78491e-05	0.00131827	MSTRG.1306.14|MSTRG.1306.31|MSTRG.1306.32	http://amigo.geneontology.org/amigo/term/GO:0030658
phagocytic vesicle membrane	Gene Ontology	GO:0030670	CC	3	26	4.71183e-05	0.00146514	MSTRG.1306.14|MSTRG.1306.31|MSTRG.1306.32	http://amigo.geneontology.org/amigo/term/GO:0030670
WW domain binding	Gene Ontology	GO:0050699	MF	3	29	6.36267e-05	0.0017375	MSTRG.15522.3|MSTRG.15522.2|MSTRG.15522.1	http://amigo.geneontology.org/amigo/term/GO:0050699
extracellular matrix binding	Gene Ontology	GO:0050840	MF	3	31	7.64964e-05	0.00201157	MSTRG.1306.14|MSTRG.1306.31|MSTRG.1306.32	http://amigo.geneontology.org/amigo/term/GO:0050840
lipopolysaccharide binding	Gene Ontology	GO:0001530	MF	3	32	8.35228e-05	0.00204487	MSTRG.1306.14|MSTRG.1306.31|MSTRG.1306.32	http://amigo.geneontology.org/amigo/term/GO:0001530
blastocyst development	Gene Ontology	GO:0001824	BP	3	32	8.35228e-05	0.00204487	MSTRG.1306.14|MSTRG.1306.31|MSTRG.1306.32	http://amigo.geneontology.org/amigo/term/GO:0001824
antimicrobial humoral immune response mediated by antimicrobial peptide	Gene Ontology	GO:0061844	BP	4	94	9.52015e-05	0.0022531	MSTRG.1306.14|MSTRG.1306.31|NM_053700|MSTRG.1306.32	http://amigo.geneontology.org/amigo/term/GO:0061844
retina homeostasis	Gene Ontology	GO:0001895	BP	3	36	0.000115819	0.00249185	NM_022708|NM_133513|MSTRG.3827.1	http://amigo.geneontology.org/amigo/term/GO:0001895
tissue regeneration	Gene Ontology	GO:0042246	BP	3	36	0.000115819	0.00249185	MSTRG.1306.14|MSTRG.1306.31|MSTRG.1306.32	http://amigo.geneontology.org/amigo/term/GO:0042246
synapse	Gene Ontology	GO:0045202	CC	8	604	0.000115246	0.00249185	MSTRG.5207.1|MSTRG.4767.2|MSTRG.10027.1|MSTRG.10027.3|MSTRG.252.1|MSTRG.3827.1|MSTRG.300.1|MSTRG.12184.1	http://amigo.geneontology.org/amigo/term/GO:0045202
regulation of vascular endothelial growth factor signaling pathway	Gene Ontology	GO:1900746	BP	2	5	0.000119607	0.00249768	MSTRG.13278.2|NM_001114405	http://amigo.geneontology.org/amigo/term/GO:1900746
response to wounding	Gene Ontology	GO:0009611	BP	4	105	0.000143708	0.00283423	MSTRG.12459.4|MSTRG.1306.31|MSTRG.1306.32|MSTRG.1306.14	http://amigo.geneontology.org/amigo/term/GO:0009611
carbon dioxide transport	Gene Ontology	GO:0015670	BP	2	6	0.000159226	0.00290482	MSTRG.10442.1|NM_012779	http://amigo.geneontology.org/amigo/term/GO:0015670
response to estrogen	Gene Ontology	GO:0043627	BP	4	108	0.00015956	0.00290482	MSTRG.1306.14|MSTRG.1306.31|MSTRG.10442.1|MSTRG.1306.32	http://amigo.geneontology.org/amigo/term/GO:0043627
positive regulation of establishment of protein localization	Gene Ontology	GO:1904951	BP	2	6	0.000159226	0.00290482	MSTRG.13278.2|NM_001114405	http://amigo.geneontology.org/amigo/term/GO:1904951
response to bacterium	Gene Ontology	GO:0009617	BP	5	209	0.000172658	0.00306468	MSTRG.13694.1|MSTRG.1306.14|MSTRG.1306.31|NM_019292|MSTRG.1306.32	http://amigo.geneontology.org/amigo/term/GO:0009617
stereocilium	Gene Ontology	GO:0032420	CC	3	42	0.000177967	0.00308188	MSTRG.5207.1|MSTRG.300.1|MSTRG.12184.1	http://amigo.geneontology.org/amigo/term/GO:0032420
extracellular region	Gene Ontology	GO:0005576	CC	8	663	0.000215646	0.00364544	NM_022708|MSTRG.4880.2|NM_133513|NM_053700|MSTRG.13694.1|NM_030852|NM_012684|NM_198729	http://amigo.geneontology.org/amigo/term/GO:0005576
scavenger receptor activity	Gene Ontology	GO:0005044	MF	3	46	0.000229472	0.00378323	MSTRG.1306.14|MSTRG.1306.31|MSTRG.1306.32	http://amigo.geneontology.org/amigo/term/GO:0005044
protein binding	Gene Ontology	GO:0005515	MF	13	1713	0.000234453	0.00378323	MSTRG.8592.2|MSTRG.10442.1|MSTRG.4767.2|MSTRG.10027.1|MSTRG.13828.4|MSTRG.10027.3|MSTRG.252.1|MSTRG.591.1|MSTRG.3827.1|MSTRG.12459.4|MSTRG.13694.1|MSTRG.5163.3|MSTRG.3384.1	http://amigo.geneontology.org/amigo/term/GO:0005515
pancreatic juice secretion	Gene Ontology	GO:0030157	BP	2	8	0.000255099	0.0039374	MSTRG.10442.1|NM_012779	http://amigo.geneontology.org/amigo/term/GO:0030157
cellular hypotonic response	Gene Ontology	GO:0071476	BP	2	8	0.000255099	0.0039374	MSTRG.3535.3|NM_012779	http://amigo.geneontology.org/amigo/term/GO:0071476
defense response	Gene Ontology	GO:0006952	BP	3	49	0.000273829	0.00413656	MSTRG.1306.14|MSTRG.1306.31|MSTRG.1306.32	http://amigo.geneontology.org/amigo/term/GO:0006952
striated muscle contraction	Gene Ontology	GO:0006941	BP	2	12	0.000512647	0.00742815	MSTRG.2452.13|MSTRG.2452.11	http://amigo.geneontology.org/amigo/term/GO:0006941
water channel activity	Gene Ontology	GO:0015250	MF	2	13	0.000590591	0.00838639	MSTRG.10442.1|NM_012779	http://amigo.geneontology.org/amigo/term/GO:0015250
extrinsic component of membrane	Gene Ontology	GO:0019898	CC	3	65	0.000603985	0.00840842	MSTRG.1306.14|MSTRG.1306.31|MSTRG.1306.32	http://amigo.geneontology.org/amigo/term/GO:0019898
receptor-mediated endocytosis	Gene Ontology	GO:0006898	BP	3	66	0.000630347	0.00848815	MSTRG.1306.14|MSTRG.1306.31|MSTRG.1306.32	http://amigo.geneontology.org/amigo/term/GO:0006898
response to organic substance	Gene Ontology	GO:0010033	BP	4	157	0.000633622	0.00848815	MSTRG.1306.14|MSTRG.1306.31|MSTRG.1553.2|MSTRG.1306.32	http://amigo.geneontology.org/amigo/term/GO:0010033
positive regulation of NIK/NF-kappaB signaling	Gene Ontology	GO:1901224	BP	3	69	0.000713808	0.00938525	MSTRG.13278.2|NM_022265|NM_001114405	http://amigo.geneontology.org/amigo/term/GO:1901224
nucleus	Gene Ontology	GO:0005634	CC	23	4821	0.00081441	0.0104853	NM_022708|MSTRG.13694.1|NM_001114405|MSTRG.1708.8|MSTRG.4767.2|MSTRG.14399.6|MSTRG.15522.3|MSTRG.15522.2|MSTRG.15522.1|NM_012863|MSTRG.5163.3|MSTRG.1891.1|MSTRG.10027.1|MSTRG.10027.3|MSTRG.3827.1|MSTRG.4028.5|NM_022265|MSTRG.10442.1|MSTRG.13828.4|MSTRG.12459.4|NM_053894|MSTRG.13278.2|NM_001329883	http://amigo.geneontology.org/amigo/term/GO:0005634
cytoskeleton	Gene Ontology	GO:0005856	CC	5	298	0.000843551	0.0104853	MSTRG.5207.1|MSTRG.300.1|MSTRG.5782.4|MSTRG.3827.1|MSTRG.12184.1	http://amigo.geneontology.org/amigo/term/GO:0005856
peptidase inhibitor activity	Gene Ontology	GO:0030414	MF	2	16	0.000856546	0.0104853	NM_012684|NM_133513	http://amigo.geneontology.org/amigo/term/GO:0030414
glomerular filtration	Gene Ontology	GO:0003094	BP	2	17	0.00095582	0.0107719	MSTRG.10442.1|MSTRG.14725.2	http://amigo.geneontology.org/amigo/term/GO:0003094
water transport	Gene Ontology	GO:0006833	BP	2	17	0.00095582	0.0107719	MSTRG.10442.1|NM_012779	http://amigo.geneontology.org/amigo/term/GO:0006833
extracellular matrix organization	Gene Ontology	GO:0030198	BP	4	173	0.000902151	0.0107719	NM_030852|MSTRG.3454.4|MSTRG.13828.4|NM_138518	http://amigo.geneontology.org/amigo/term/GO:0030198
cytoplasmic ribonucleoprotein granule	Gene Ontology	GO:0036464	CC	3	76	0.000935076	0.0107719	MSTRG.2452.13|MSTRG.2452.11|MSTRG.3827.1	http://amigo.geneontology.org/amigo/term/GO:0036464
positive regulation of vascular permeability	Gene Ontology	GO:0043117	BP	2	17	0.00095582	0.0107719	MSTRG.13278.2|NM_001114405	http://amigo.geneontology.org/amigo/term/GO:0043117
platelet alpha granule	Gene Ontology	GO:0031091	CC	2	18	0.00106036	0.0117634	MSTRG.220.2|MSTRG.5163.3	http://amigo.geneontology.org/amigo/term/GO:0031091
negative regulation of NF-kappaB transcription factor activity	Gene Ontology	GO:0032088	BP	3	80	0.00107897	0.0117856	MSTRG.15522.3|MSTRG.15522.2|MSTRG.15522.1	http://amigo.geneontology.org/amigo/term/GO:0032088
ribosome	Gene Ontology	GO:0005840	CC	3	81	0.001117	0.0120162	MSTRG.252.1|MSTRG.13004.2|MSTRG.13004.3	http://amigo.geneontology.org/amigo/term/GO:0005840
stress fiber	Gene Ontology	GO:0001725	CC	3	85	0.00127755	0.0133392	MSTRG.3535.3|MSTRG.5782.4|MSTRG.3827.1	http://amigo.geneontology.org/amigo/term/GO:0001725
translation elongation factor activity	Gene Ontology	GO:0003746	MF	2	22	0.00153072	0.0155259	MSTRG.10027.1|MSTRG.10027.3	http://amigo.geneontology.org/amigo/term/GO:0003746
camera-type eye morphogenesis	Gene Ontology	GO:0048593	BP	2	22	0.00153072	0.0155259	MSTRG.10442.1|NM_012779	http://amigo.geneontology.org/amigo/term/GO:0048593
A band	Gene Ontology	GO:0031672	CC	2	23	0.00166123	0.0166123	MSTRG.2452.13|MSTRG.2452.11	http://amigo.geneontology.org/amigo/term/GO:0031672
microfilament motor activity	Gene Ontology	GO:0000146	MF	2	24	0.00179685	0.017719	MSTRG.2452.13|MSTRG.2452.11	http://amigo.geneontology.org/amigo/term/GO:0000146
glycosaminoglycan binding	Gene Ontology	GO:0005539	MF	2	25	0.00193758	0.0188449	NM_138518|MSTRG.3454.4	http://amigo.geneontology.org/amigo/term/GO:0005539
extracellular space	Gene Ontology	GO:0005615	CC	10	1407	0.00211965	0.019802	NM_022708|NM_001106121|MSTRG.1306.14|NM_133622|MSTRG.1306.32|MSTRG.3338.4|NM_138518|MSTRG.1306.31|NM_053700|MSTRG.5163.3	http://amigo.geneontology.org/amigo/term/GO:0005615
positive regulation of apoptotic process	Gene Ontology	GO:0043065	BP	5	368	0.00210616	0.019802	MSTRG.13694.1|MSTRG.14399.6|MSTRG.5163.3|MSTRG.10027.1|MSTRG.10027.3	http://amigo.geneontology.org/amigo/term/GO:0043065
defense response to Gram-negative bacterium	Gene Ontology	GO:0050829	BP	3	102	0.00211931	0.019802	MSTRG.1306.14|MSTRG.1306.31|MSTRG.1306.32	http://amigo.geneontology.org/amigo/term/GO:0050829
translational elongation	Gene Ontology	GO:0006414	BP	2	27	0.0022342	0.020601	MSTRG.10027.1|MSTRG.10027.3	http://amigo.geneontology.org/amigo/term/GO:0006414
mitochondrial small ribosomal subunit	Gene Ontology	GO:0005763	CC	2	28	0.00239005	0.0217556	MSTRG.13004.2|MSTRG.13004.3	http://amigo.geneontology.org/amigo/term/GO:0005763
endothelial cell migration	Gene Ontology	GO:0043542	BP	2	29	0.0025509	0.0229258	MSTRG.13278.2|NM_001114405	http://amigo.geneontology.org/amigo/term/GO:0043542
response to inorganic substance	Gene Ontology	GO:0010035	BP	2	36	0.00381465	0.0322429	MSTRG.10027.1|MSTRG.10027.3	http://amigo.geneontology.org/amigo/term/GO:0010035
defense response to Gram-positive bacterium	Gene Ontology	GO:0050830	BP	3	132	0.00430516	0.0359607	MSTRG.1306.14|MSTRG.1306.31|MSTRG.1306.32	http://amigo.geneontology.org/amigo/term/GO:0050830
odontogenesis	Gene Ontology	GO:0042476	BP	2	40	0.00464298	0.0382636	MSTRG.10442.1|NM_012779	http://amigo.geneontology.org/amigo/term/GO:0042476
adherens junction	Gene Ontology	GO:0005912	CC	3	137	0.00476418	0.0384383	MSTRG.6993.2|MSTRG.5782.4|MSTRG.3827.1	http://amigo.geneontology.org/amigo/term/GO:0005912
cellular response to inorganic substance	Gene Ontology	GO:0071241	BP	2	43	0.00531374	0.0423905	MSTRG.10442.1|MSTRG.4767.2	http://amigo.geneontology.org/amigo/term/GO:0071241
multivesicular body	Gene Ontology	GO:0005771	CC	2	45	0.00578414	0.045129	NM_001004084|MSTRG.9798.2	http://amigo.geneontology.org/amigo/term/GO:0005771
substantia nigra development	Gene Ontology	GO:0021762	BP	2	45	0.00578414	0.045129	MSTRG.3338.4|MSTRG.3827.1	http://amigo.geneontology.org/amigo/term/GO:0021762

## Sheet: S7
Table S7. KEGG pathway analysis of downregulated genes in injured urethral tissues. Pathways with FDR values smaller than 0.05 were regarded as statistically significant enriched. Statistical test method: hypergeometric test / Fisher's exact test. FDR correction method: Benjamini and Hochberg.
Term	Database	ID	Input number	Background number	P-Value	Corrected P-Value	Input	Hyperlink
Viral myocarditis	KEGG PATHWAY	rno05416	5	97	4.97245e-06	0.000392271	MSTRG.8592.2|NM_001004084|MSTRG.8519.1|MSTRG.3827.1|NM_001008839	http://www.genome.jp/kegg-bin/show_pathway?rno05416/rno:309622%09red/rno:414819%09red/rno:309627%09red/rno:81822%09red
Cell adhesion molecules (CAMs)	KEGG PATHWAY	rno04514	6	178	5.71918e-06	0.000392737	MSTRG.8592.2|MSTRG.6993.2|NM_001106058|NM_001004084|NM_001008839|MSTRG.8519.1	http://www.genome.jp/kegg-bin/show_pathway?rno04514/rno:307618%09red/rno:309622%09red/rno:414819%09red/rno:309627%09red/rno:290485%09red
Phagosome	KEGG PATHWAY	rno04145	6	198	1.03083e-05	0.000487925	MSTRG.220.2|MSTRG.8592.2|NM_001004084|MSTRG.3827.1|NM_001008839|MSTRG.8519.1	http://www.genome.jp/kegg-bin/show_pathway?rno04145/rno:309622%09red/rno:414819%09red/rno:309627%09red/rno:292406%09red/rno:81822%09red
Graft-versus-host disease	KEGG PATHWAY	rno05332	4	71	3.34066e-05	0.00124835	MSTRG.8592.2|NM_001004084|MSTRG.8519.1|NM_001008839	http://www.genome.jp/kegg-bin/show_pathway?rno05332/rno:309622%09red/rno:414819%09red/rno:309627%09red
Allograft rejection	KEGG PATHWAY	rno05330	4	74	3.8991e-05	0.00131827	MSTRG.8592.2|NM_001004084|MSTRG.8519.1|NM_001008839	http://www.genome.jp/kegg-bin/show_pathway?rno05330/rno:309622%09red/rno:414819%09red/rno:309627%09red
Salivary secretion	KEGG PATHWAY	rno04970	4	78	4.74622e-05	0.00146514	MSTRG.1306.14|MSTRG.1306.31|MSTRG.1306.32|NM_012779	http://www.genome.jp/kegg-bin/show_pathway?rno04970/rno:170568%09red/rno:25241%09red
Type I diabetes mellitus	KEGG PATHWAY	rno04940	4	80	5.21678e-05	0.0015433	MSTRG.8592.2|NM_001004084|MSTRG.8519.1|NM_001008839	http://www.genome.jp/kegg-bin/show_pathway?rno04940/rno:309622%09red/rno:414819%09red/rno:309627%09red
Autoimmune thyroid disease	KEGG PATHWAY	rno05320	4	81	5.46442e-05	0.00155189	MSTRG.8592.2|NM_001004084|MSTRG.8519.1|NM_001008839	http://www.genome.jp/kegg-bin/show_pathway?rno05320/rno:309622%09red/rno:414819%09red/rno:309627%09red
Antigen processing and presentation	KEGG PATHWAY	rno04612	4	101	0.000124385	0.00252323	MSTRG.8592.2|NM_001004084|MSTRG.8519.1|NM_001008839	http://www.genome.jp/kegg-bin/show_pathway?rno04612/rno:309622%09red/rno:414819%09red/rno:309627%09red
Legionellosis	KEGG PATHWAY	rno05134	3	58	0.000439031	0.006494	MSTRG.13694.1|MSTRG.10027.1|MSTRG.10027.3	http://www.genome.jp/kegg-bin/show_pathway?rno05134/rno:25166%09red/rno:24799%09red
Tight junction	KEGG PATHWAY	rno04530	4	170	0.000846627	0.0104853	MSTRG.2452.13|MSTRG.2452.11|MSTRG.3827.1|NM_001106058	http://www.genome.jp/kegg-bin/show_pathway?rno04530/rno:81822%09red/rno:287408%09red/rno:290485%09red
Cellular senescence	KEGG PATHWAY	rno04218	4	189	0.00124234	0.013165	MSTRG.8592.2|MSTRG.5163.3|MSTRG.8519.1|NM_001008839	http://www.genome.jp/kegg-bin/show_pathway?rno04218/rno:414819%09red/rno:309627%09red/rno:24484%09red
Epstein-Barr virus infection	KEGG PATHWAY	rno05169	4	237	0.00278632	0.0247286	MSTRG.8592.2|NM_001004084|MSTRG.8519.1|NM_001008839	http://www.genome.jp/kegg-bin/show_pathway?rno05169/rno:309622%09red/rno:414819%09red/rno:309627%09red
Leukocyte transendothelial migration	KEGG PATHWAY	rno04670	3	115	0.00295074	0.0258645	NM_001106058|MSTRG.6993.2|MSTRG.3827.1	http://www.genome.jp/kegg-bin/show_pathway?rno04670/rno:307618%09red/rno:81822%09red/rno:290485%09red
Herpes simplex virus 1 infection	KEGG PATHWAY	rno05168	5	414	0.00346858	0.0300329	MSTRG.12459.4|NM_001004084|MSTRG.8519.1|MSTRG.8592.2|NM_001008839	http://www.genome.jp/kegg-bin/show_pathway?rno05168/rno:309622%09red/rno:414819%09red/rno:309627%09red/rno:29667%09red
Human T-cell leukemia virus 1 infection	KEGG PATHWAY	rno05166	4	255	0.00360401	0.0308295	MSTRG.8592.2|NM_001004084|MSTRG.8519.1|NM_001008839	http://www.genome.jp/kegg-bin/show_pathway?rno05166/rno:309622%09red/rno:414819%09red/rno:309627%09red
Endocytosis	KEGG PATHWAY	rno04144	4	275	0.00468863	0.0382636	MSTRG.8592.2|MSTRG.8519.1|MSTRG.9798.2|NM_001008839	http://www.genome.jp/kegg-bin/show_pathway?rno04144/rno:414819%09red/rno:309627%09red/rno:679886%09red

## Sheet: S8
Table S8. The upregulated gene sets in phenotype injured. Gene sets with nominal P-value < 0.05 and FDR < 0.25 are remained and sorted in descending order by │NES│. The definition of the columns is stated in Subramanian et al., 2005, Proc Natl Acad Sci U S A, 102(43): 15545-50.
Gene Set	SIZE	ES	NES	NOM p-val	FDR q-val	FWER p-val	RANK AT MAX	LEADING EDGE
GOBP_PROTEIN_ACTIVATION_CASCADE	109	0.668942	2.12701	0	0.00107066	0.001	3979	tags=18%, list=12%, signal=21%
GOBP_COMPLEMENT_ACTIVATION	99	0.678726	2.10942	0	0.000535328	0.001	3397	tags=16%, list=10%, signal=18%
GOBP_ANTIGEN_PROCESSING_AND_PRESENTATION_OF_PEPTIDE_OR_POLYSACCHARIDE_ANTIGEN_VIA_MHC_CLASS_II	21	0.857453	2.06167	0	0.0021972	0.006	2666	tags=67%, list=8%, signal=73%
KEGG_STAPHYLOCOCCUS_AUREUS_INFECTION	47	0.745714	2.04862	0	0.00192277	0.007	1848	tags=51%, list=6%, signal=54%
GOMF_PHEROMONE_RECEPTOR_ACTIVITY	107	0.626721	2.00317	0	0.00508036	0.023	2552	tags=1%, list=8%, signal=1%
KEGG_COMPLEMENT_AND_COAGULATION_CASCADES	79	0.646749	1.97773	0	0.00832422	0.044	4128	tags=48%, list=13%, signal=55%
GOBP_POSITIVE_REGULATION_OF_VASCULAR_ENDOTHELIAL_GROWTH_FACTOR_PRODUCTION	23	0.790869	1.91601	0	0.0268223	0.152	3489	tags=61%, list=11%, signal=68%
GOBP_PHAGOCYTOSIS,_ENGULFMENT	92	0.621187	1.91324	0	0.0244347	0.155	4342	tags=18%, list=13%, signal=21%
GOCC_CYTOSOLIC_SMALL_RIBOSOMAL_SUBUNIT	109	0.591609	1.9102	0	0.0232035	0.165	6565	tags=50%, list=20%, signal=62%
GOBP_CHEMOKINE-MEDIATED_SIGNALING_PATHWAY	49	0.680106	1.90627	0	0.0221213	0.174	3073	tags=51%, list=9%, signal=56%
KEGG_ASTHMA	25	0.793659	1.90273	0.00289017	0.0222208	0.19	4129	tags=52%, list=13%, signal=59%
GOBP_CELLULAR_RESPONSE_TO_INTERFERON-GAMMA	56	0.665687	1.8972	0	0.0221246	0.206	3505	tags=48%, list=11%, signal=54%
GOBP_REGULATION_OF_VASCULAR_ENDOTHELIAL_GROWTH_FACTOR_PRODUCTION	28	0.755081	1.89421	0	0.0217035	0.218	3489	tags=57%, list=11%, signal=64%
GOBP_MONOCYTE_CHEMOTAXIS	40	0.702439	1.89232	0	0.0205526	0.223	3073	tags=52%, list=9%, signal=58%
GOBP_VASCULAR_ENDOTHELIAL_GROWTH_FACTOR_PRODUCTION	30	0.739549	1.86482	0	0.03351	0.351	3489	tags=57%, list=11%, signal=63%
GOBP_LEUKOCYTE_CHEMOTAXIS	147	0.55253	1.8315	0	0.0580347	0.574	2915	tags=41%, list=9%, signal=45%
GOBP_REGULATION_OF_LEUKOCYTE_CHEMOTAXIS	80	0.590835	1.80938	0	0.0774618	0.717	2858	tags=45%, list=9%, signal=49%
GOBP_MONONUCLEAR_CELL_MIGRATION	54	0.657425	1.80569	0	0.0772801	0.737	3409	tags=54%, list=10%, signal=60%
GOMF_COLLAGEN_BINDING	50	0.638979	1.79902	0	0.0822712	0.771	3033	tags=52%, list=9%, signal=57%
GOMF_GLYCOSAMINOGLYCAN_BINDING	148	0.546515	1.79854	0	0.0784335	0.772	6019	tags=58%, list=18%, signal=71%
GOBP_PLASMA_MEMBRANE_INVAGINATION	100	0.579068	1.79768	0	0.0755893	0.777	4473	tags=19%, list=14%, signal=22%
GOBP_COLLAGEN_FIBRIL_ORGANIZATION	27	0.730468	1.79049	0	0.0810446	0.809	4538	tags=78%, list=14%, signal=90%
GOBP_MYELOID_LEUKOCYTE_MIGRATION	126	0.556666	1.77635	0	0.0961361	0.864	2799	tags=40%, list=9%, signal=43%
GOBP_NEUTROPHIL_CHEMOTAXIS	64	0.606253	1.77396	0	0.0955393	0.876	3073	tags=48%, list=9%, signal=53%
GOBP_REGULATION_OF_GRANULOCYTE_CHEMOTAXIS	31	0.702685	1.77371	0.00284091	0.0919848	0.876	2540	tags=55%, list=8%, signal=59%
GOCC_CYTOSOLIC_RIBOSOME	346	0.494656	1.76446	0	0.100612	0.911	6640	tags=46%, list=20%, signal=57%
GOMF_HEPARIN_BINDING	108	0.556049	1.7639	0	0.0976249	0.912	5791	tags=55%, list=18%, signal=66%
KEGG_MALARIA	52	0.626598	1.75529	0	0.10467	0.932	4342	tags=52%, list=13%, signal=60%
GOBP_POSITIVE_REGULATION_OF_CHEMOKINE_PRODUCTION	40	0.648157	1.7548	0	0.101788	0.935	3577	tags=48%, list=11%, signal=53%
GOBP_PHAGOCYTOSIS	182	0.516708	1.75353	0	0.0999489	0.94	3196	tags=26%, list=10%, signal=28%
GOBP_NEUTROPHIL_MIGRATION	72	0.578497	1.74612	0	0.107784	0.948	3674	tags=47%, list=11%, signal=53%
GOBP_RESPONSE_TO_INTERFERON-GAMMA	72	0.589182	1.74501	0	0.105514	0.949	3505	tags=44%, list=11%, signal=50%
GOCC_RIBOSOMAL_SUBUNIT	416	0.480513	1.7441	0	0.103292	0.951	6640	tags=44%, list=20%, signal=54%
GOBP_REGULATION_OF_LEUKOCYTE_MIGRATION	132	0.536806	1.73563	0	0.11104	0.96	3674	tags=42%, list=11%, signal=47%
KEGG_HEMATOPOIETIC_CELL_LINEAGE	85	0.556718	1.73244	0	0.112456	0.965	3878	tags=44%, list=12%, signal=49%
GOBP_GRANULOCYTE_MIGRATION	86	0.558144	1.73226	0	0.109727	0.965	2540	tags=41%, list=8%, signal=44%
GOBP_RIBOSOMAL_SMALL_SUBUNIT_ASSEMBLY	43	0.63144	1.7308	0.0031348	0.109091	0.968	4944	tags=49%, list=15%, signal=57%
GOBP_REGULATION_OF_NEUTROPHIL_CHEMOTAXIS	23	0.738574	1.72855	0.00280112	0.109373	0.971	1774	tags=48%, list=5%, signal=51%
GOBP_LEUKOCYTE_MIGRATION	231	0.500353	1.72181	0	0.116625	0.979	3694	tags=39%, list=11%, signal=44%
GOCC_CYTOSOLIC_LARGE_RIBOSOMAL_SUBUNIT	229	0.494924	1.71129	0	0.130021	0.985	6640	tags=46%, list=20%, signal=57%
GOCC_RNO_ENS_GO:0015935_SMALL_RIBOSOMAL_SUBUNIT	147	0.525442	1.70684	0	0.134034	0.987	6623	tags=46%, list=20%, signal=57%
GOBP_POSITIVE_REGULATION_OF_GRANULOCYTE_CHEMOTAXIS	21	0.729492	1.70608	0.0116959	0.131795	0.988	1774	tags=48%, list=5%, signal=50%
GOBP_GRANULOCYTE_CHEMOTAXIS	76	0.579583	1.70533	0	0.129683	0.988	2799	tags=46%, list=9%, signal=50%
GOBP_REGULATION_OF_ANTIGEN_PROCESSING_AND_PRESENTATION	15	0.797263	1.70463	0.0132979	0.127952	0.988	4342	tags=73%, list=13%, signal=84%
GOBP_TUMOR_NECROSIS_FACTOR_PRODUCTION	88	0.55115	1.70187	0	0.129645	0.99	4076	tags=39%, list=12%, signal=44%
GOBP_POSITIVE_REGULATION_OF_LEUKOCYTE_CHEMOTAXIS	66	0.574339	1.69933	0.00352113	0.130685	0.992	2799	tags=44%, list=9%, signal=48%
GOBP_REGULATION_OF_NEUTROPHIL_MIGRATION	27	0.6788	1.69496	0.00271003	0.133351	0.995	1774	tags=41%, list=5%, signal=43%
KEGG_OSTEOCLAST_DIFFERENTIATION	123	0.521677	1.69221	0	0.134456	0.998	5299	tags=44%, list=16%, signal=52%
GOBP_REGULATION_OF_MONONUCLEAR_CELL_MIGRATION	30	0.6596	1.68771	0.00569801	0.13872	0.998	3941	tags=60%, list=12%, signal=68%
GOBP_POSITIVE_REGULATION_OF_NEUTROPHIL_CHEMOTAXIS	20	0.729494	1.68759	0.00755667	0.136081	0.998	1774	tags=50%, list=5%, signal=53%
GOBP_REGULATION_OF_TUMOR_NECROSIS_FACTOR_PRODUCTION	87	0.552293	1.68598	0	0.135971	0.998	4076	tags=39%, list=12%, signal=44%
GOBP_MEMBRANE_INVAGINATION	106	0.533641	1.68375	0	0.136615	0.998	4473	tags=18%, list=14%, signal=21%
GOBP_POSITIVE_REGULATION_OF_LEUKOCYTE_MIGRATION	96	0.542044	1.67967	0	0.140445	0.998	3674	tags=43%, list=11%, signal=48%
GOBP_POSITIVE_REGULATION_OF_PHAGOCYTOSIS	38	0.631968	1.67475	0	0.145311	0.999	3138	tags=42%, list=10%, signal=46%
GOMF_IMMUNOGLOBULIN_BINDING	19	0.726868	1.6741	0.00775194	0.143918	0.999	3941	tags=47%, list=12%, signal=54%
GOMF_FERRIC_IRON_BINDING	25	0.684835	1.67279	0.0108992	0.142976	0.999	2777	tags=28%, list=8%, signal=31%
GOBP_REGULATION_OF_TUMOR_NECROSIS_FACTOR_SUPERFAMILY_CYTOKINE_PRODUCTION	89	0.53902	1.6726	0	0.140779	0.999	4076	tags=39%, list=12%, signal=45%
GOBP_REGULATION_OF_ACUTE_INFLAMMATORY_RESPONSE	47	0.596975	1.66901	0.00324675	0.143893	0.999	3397	tags=40%, list=10%, signal=45%
GOBP_CELLULAR_RESPONSE_TO_INTERLEUKIN-1	76	0.561895	1.66795	0.00344828	0.142881	0.999	4212	tags=36%, list=13%, signal=41%
GOBP_PROTEIN_HETEROTRIMERIZATION	15	0.784042	1.66463	0.008	0.145544	0.999	5330	tags=73%, list=16%, signal=87%
GOBP_REGULATION_OF_PHAGOCYTOSIS	63	0.576906	1.66409	0	0.144084	0.999	3196	tags=40%, list=10%, signal=44%
GOMF_MHC_PROTEIN_BINDING	26	0.666809	1.66233	0.00289855	0.144453	0.999	3973	tags=54%, list=12%, signal=61%
GOBP_COLLAGEN_CATABOLIC_PROCESS	17	0.758546	1.66187	0.0183246	0.142886	0.999	3044	tags=65%, list=9%, signal=71%
GOBP_TUMOR_NECROSIS_FACTOR_SUPERFAMILY_CYTOKINE_PRODUCTION	91	0.537931	1.6616	0	0.140948	0.999	4076	tags=38%, list=12%, signal=44%
GOBP_POSITIVE_REGULATION_OF_RESPONSE_TO_EXTERNAL_STIMULUS	215	0.479906	1.65879	0	0.142881	0.999	4986	tags=40%, list=15%, signal=47%
GOBP_CELL_CHEMOTAXIS	199	0.484602	1.65413	0	0.147747	0.999	3694	tags=40%, list=11%, signal=44%
GOMF_CHEMOKINE_RECEPTOR_ACTIVITY	24	0.693124	1.64589	0.00791557	0.159252	1	3328	tags=46%, list=10%, signal=51%
GOMF_OXIDOREDUCTASE_ACTIVITY,_ACTING_ON_THE_CH-NH2_GROUP_OF_DONORS,_OXYGEN_AS_ACCEPTOR	19	0.73	1.64479	0.0163934	0.158996	1	2635	tags=32%, list=8%, signal=34%
GOBP_POSITIVE_REGULATION_OF_NEUTROPHIL_MIGRATION	23	0.677743	1.64405	0.00555556	0.157804	1	1774	tags=43%, list=5%, signal=46%
KEGG_AGE-RAGE_SIGNALING_PATHWAY_IN_DIABETIC_COMPLICATIONS	101	0.522176	1.64374	0	0.15623	1	4797	tags=41%, list=15%, signal=47%
GOBP_REGULATION_OF_CHEMOTAXIS	161	0.48887	1.63866	0	0.16246	1	3972	tags=39%, list=12%, signal=44%
KEGG_LEISHMANIASIS	64	0.559767	1.63764	0	0.162172	1	4076	tags=39%, list=12%, signal=45%
GOBP_CYTOPLASMIC_TRANSLATION	111	0.50841	1.63485	0	0.164689	1	6575	tags=43%, list=20%, signal=54%
GOCC_LARGE_RIBOSOMAL_SUBUNIT	267	0.464017	1.63208	0	0.166932	1	6640	tags=43%, list=20%, signal=54%
KEGG_PRION_DISEASES	33	0.638105	1.63079	0.0114943	0.166957	1	4970	tags=39%, list=15%, signal=46%
GOBP_POSITIVE_REGULATION_OF_MONONUCLEAR_CELL_MIGRATION	18	0.727198	1.6303	0.0108401	0.165493	1	3941	tags=61%, list=12%, signal=69%
GOMF_G-PROTEIN_COUPLED_CHEMOATTRACTANT_RECEPTOR_ACTIVITY	24	0.693124	1.62657	0.0106383	0.170031	1	3328	tags=46%, list=10%, signal=51%
GOCC_CYTOSOLIC_PART	450	0.442185	1.62045	0	0.177603	1	6454	tags=41%, list=20%, signal=50%
GOBP_REGULATION_OF_MONOCYTE_CHEMOTAXIS	18	0.715703	1.61882	0.0212766	0.178418	1	2540	tags=56%, list=8%, signal=60%
GOBP_POSITIVE_REGULATION_OF_TUMOR_NECROSIS_FACTOR_PRODUCTION	47	0.576912	1.61538	0.00623053	0.181909	1	4601	tags=47%, list=14%, signal=54%
GOBP_CHONDROITIN_SULFATE_PROTEOGLYCAN_METABOLIC_PROCESS	22	0.683915	1.61372	0.0243243	0.182538	1	5501	tags=64%, list=17%, signal=76%
GOBP_INTERLEUKIN-8_PRODUCTION	53	0.575971	1.61245	0.003125	0.182473	1	4125	tags=40%, list=13%, signal=45%
GOBP_RIBOSOMAL_SMALL_SUBUNIT_BIOGENESIS	97	0.512818	1.61178	0	0.181447	1	5049	tags=36%, list=15%, signal=43%
GOCC_EXTRACELLULAR_MATRIX	400	0.442822	1.61165	0	0.179524	1	4255	tags=45%, list=13%, signal=50%
GOMF_TRANSFORMING_GROWTH_FACTOR_BETA_BINDING	15	0.751963	1.61128	0.015873	0.17799	1	4342	tags=60%, list=13%, signal=69%
KEGG_PERTUSSIS	69	0.550863	1.60824	0	0.181578	1	4579	tags=43%, list=14%, signal=50%
KEGG_GLYCOSAMINOGLYCAN_BIOSYNTHESIS	19	0.712631	1.60686	0.0126263	0.181533	1	7711	tags=84%, list=23%, signal=110%
GOBP_MULTICELLULAR_ORGANISM_CATABOLIC_PROCESS	20	0.67711	1.60448	0.0105263	0.183811	1	3044	tags=55%, list=9%, signal=61%
GOBP_POSITIVE_REGULATION_OF_ERK1_AND_ERK2_CASCADE	143	0.492708	1.6034	0.004329	0.183749	1	3489	tags=30%, list=11%, signal=33%
KEGG_SYSTEMIC_LUPUS_ERYTHEMATOSUS	92	0.518652	1.60103	0	0.18593	1	1797	tags=23%, list=5%, signal=24%
GOCC_COLLAGEN_TRIMER	63	0.543905	1.60037	0.00319489	0.185186	1	4625	tags=59%, list=14%, signal=68%
GOBP_POSITIVE_REGULATION_OF_CHEMOTAXIS	104	0.50661	1.5969	0	0.188926	1	4342	tags=41%, list=13%, signal=47%
GOBP_AMINOGLYCAN_CATABOLIC_PROCESS	28	0.646237	1.5953	0.0240964	0.189681	1	6013	tags=39%, list=18%, signal=48%
GOBP_COMPLEMENT_ACTIVATION,_CLASSICAL_PATHWAY	76	0.532771	1.59373	0	0.190315	1	5796	tags=11%, list=18%, signal=13%
KEGG_CHEMOKINE_SIGNALING_PATHWAY	172	0.47405	1.59366	0	0.188416	1	4875	tags=35%, list=15%, signal=41%
GOBP_POSITIVE_REGULATION_OF_INFLAMMATORY_RESPONSE	84	0.535225	1.59284	0	0.187816	1	3164	tags=40%, list=10%, signal=45%
GOMF_EXTRACELLULAR_MATRIX_STRUCTURAL_CONSTITUENT	40	0.595028	1.59197	0.00346021	0.187483	1	5276	tags=60%, list=16%, signal=71%
GOBP_GLYCOSAMINOGLYCAN_METABOLIC_PROCESS	79	0.523001	1.5879	0.00353357	0.193361	1	5603	tags=48%, list=17%, signal=58%
GOBP_RENAL_SYSTEM_PROCESS_INVOLVED_IN_REGULATION_OF_SYSTEMIC_ARTERIAL_BLOOD_PRESSURE	21	0.661053	1.56842	0.0262467	0.228735	1	4210	tags=57%, list=13%, signal=65%
GOBP_AMINOGLYCAN_METABOLIC_PROCESS	90	0.502192	1.56356	0	0.236309	1	5603	tags=46%, list=17%, signal=55%
GOMF_OXIDOREDUCTASE_ACTIVITY,_ACTING_ON_THE_CH-NH2_GROUP_OF_DONORS	22	0.681361	1.5625	0.0293333	0.236231	1	2820	tags=32%, list=9%, signal=35%
GOBP_REGULATION_OF_INTERLEUKIN-8_PRODUCTION	48	0.554273	1.56182	0.00298507	0.235395	1	4125	tags=35%, list=13%, signal=40%
GOBP_POSITIVE_REGULATION_OF_INTERLEUKIN-8_PRODUCTION	34	0.604919	1.56137	0.0231214	0.234003	1	4125	tags=38%, list=13%, signal=44%
GOBP_PLASMA_LIPOPROTEIN_PARTICLE_CLEARANCE	25	0.633701	1.5607	0.0252809	0.233067	1	4093	tags=48%, list=12%, signal=55%
GOBP_ACTIVATION_OF_IMMUNE_RESPONSE	295	0.441493	1.55911	0	0.234078	1	4667	tags=27%, list=14%, signal=31%
GOBP_EXTRACELLULAR_MATRIX_ORGANIZATION	162	0.468206	1.55711	0	0.235981	1	4625	tags=47%, list=14%, signal=54%
GOBP_CHONDROITIN_SULFATE_METABOLIC_PROCESS	18	0.699654	1.55321	0.0428954	0.241578	1	5501	tags=67%, list=17%, signal=80%
GOBP_EXTRACELLULAR_STRUCTURE_ORGANIZATION	163	0.46748	1.55299	0.00512821	0.239782	1	4625	tags=47%, list=14%, signal=54%
GOBP_IRON_ION_TRANSPORT	46	0.569742	1.55286	0	0.237787	1	3037	tags=33%, list=9%, signal=36%
GOBP_NEGATIVE_REGULATION_OF_CELLULAR_RESPONSE_TO_TRANSFORMING_GROWTH_FACTOR_BETA_STIMULUS	48	0.554533	1.5508	0	0.239914	1	5217	tags=46%, list=16%, signal=54%
GOBP_MULTICELLULAR_ORGANISMAL_MACROMOLECULE_METABOLIC_PROCESS	56	0.541647	1.54868	0.0133333	0.242136	1	4244	tags=50%, list=13%, signal=57%
GOBP_NEGATIVE_REGULATION_OF_TRANSFORMING_GROWTH_FACTOR_BETA_RECEPTOR_SIGNALING_PATHWAY	48	0.554533	1.54419	0.0151976	0.24932	1	5217	tags=46%, list=16%, signal=54%

## Sheet: S9
Table S9. The upregulated gene sets in phenotype normal. Gene sets with nominal P-value < 0.05 and FDR < 0.25 are remained and sorted in descending order by │NES│. The definition of the columns is stated in Subramanian et al., 2005, Proc Natl Acad Sci U S A, 102(43): 15545-50.
Gene Set	SIZE	ES	NES	NOM p-val	FDR q-val	FWER p-val	RANK AT MAX	LEADING EDGE
GOCC_KERATIN_FILAMENT	81	-0.768583	-2.09228	0	0	0	2741	tags=26%, list=8%, signal=28%
GOMF_BITTER_TASTE_RECEPTOR_ACTIVITY	24	-0.872718	-1.92506	0	0.00285022	0.006	47	tags=4%, list=0%, signal=4%
KEGG_OXIDATIVE_PHOSPHORYLATION	131	-0.663485	-1.89504	0	0.00856697	0.027	7479	tags=72%, list=23%, signal=93%
GOCC_OCCLUDING_JUNCTION	105	-0.662599	-1.87133	0	0.00976931	0.04	4935	tags=45%, list=15%, signal=52%
GOMF_ODORANT_BINDING	389	-0.603773	-1.86704	0	0.00857721	0.044	7569	tags=4%, list=23%, signal=5%
GOCC_MITOCHONDRIAL_PROTEIN_COMPLEX	141	-0.64335	-1.8638	0	0.00857441	0.053	9301	tags=80%, list=28%, signal=111%
GOCC_RESPIRATORY_CHAIN_COMPLEX	72	-0.692028	-1.84361	0	0.0122547	0.087	9210	tags=88%, list=28%, signal=121%
GOCC_INNER_MITOCHONDRIAL_MEMBRANE_PROTEIN_COMPLEX	113	-0.646272	-1.84084	0	0.0116751	0.095	8378	tags=76%, list=25%, signal=102%
GOCC_APICAL_JUNCTION_COMPLEX	120	-0.649633	-1.83852	0	0.0108017	0.099	4873	tags=42%, list=15%, signal=49%
GOCC_INTERMEDIATE_FILAMENT	144	-0.632603	-1.83397	0	0.010776	0.109	4085	tags=31%, list=12%, signal=36%
GOCC_BICELLULAR_TIGHT_JUNCTION	102	-0.655449	-1.81227	0	0.0170837	0.183	4873	tags=43%, list=15%, signal=50%
GOBP_RESPIRATORY_ELECTRON_TRANSPORT_CHAIN	59	-0.67886	-1.76974	0	0.0440491	0.429	8641	tags=81%, list=26%, signal=110%
GOCC_MITOCHONDRIAL_RESPIRATORY_CHAIN	76	-0.652381	-1.7662	0	0.0444808	0.465	7479	tags=72%, list=23%, signal=93%
GOBP_ELECTRON_TRANSPORT_CHAIN	67	-0.679562	-1.76273	0	0.0445759	0.492	8641	tags=79%, list=26%, signal=107%
GOCC_MITOCHONDRIAL_MEMBRANE_PART	175	-0.594803	-1.76221	0	0.0421151	0.494	9301	tags=74%, list=28%, signal=103%
GOCC_LATERAL_PLASMA_MEMBRANE	43	-0.699489	-1.7598	0	0.0416312	0.512	2772	tags=44%, list=8%, signal=48%
GOBP_ESTABLISHMENT_OF_SKIN_BARRIER	16	-0.857796	-1.75444	0	0.0434002	0.541	1917	tags=56%, list=6%, signal=60%
GOBP_INTERMEDIATE_FILAMENT_ORGANIZATION	20	-0.817414	-1.75243	0	0.0425263	0.554	1599	tags=50%, list=5%, signal=53%
GOCC_RESPIRATORY_CHAIN	89	-0.639469	-1.74991	0	0.0421968	0.576	7479	tags=70%, list=23%, signal=90%
GOBP_WATER_HOMEOSTASIS	44	-0.714011	-1.74429	0	0.0453802	0.618	3124	tags=45%, list=10%, signal=50%
GOBP_MULTICELLULAR_ORGANISMAL_WATER_HOMEOSTASIS	35	-0.725873	-1.74131	0	0.0459414	0.64	3124	tags=49%, list=10%, signal=54%
KEGG_PARKINSON S_DISEASE	140	-0.5995	-1.73207	0	0.0519551	0.71	7533	tags=66%, list=23%, signal=85%
GOBP_SENSORY_PERCEPTION_OF_BITTER_TASTE	40	-0.714894	-1.73106	0	0.051063	0.716	3120	tags=20%, list=9%, signal=22%
GOCC_MITOCHONDRIAL_RESPIRATORY_CHAIN_COMPLEX_I	45	-0.689469	-1.72575	0.00144928	0.0543002	0.753	9210	tags=87%, list=28%, signal=120%
GOBP_DETECTION_OF_CHEMICAL_STIMULUS_INVOLVED_IN_SENSORY_PERCEPTION_OF_BITTER_TASTE	35	-0.734296	-1.72569	0	0.0522045	0.753	4668	tags=20%, list=14%, signal=23%
GOCC_APICAL_PLASMA_MEMBRANE	231	-0.568279	-1.72541	0	0.0505281	0.756	3793	tags=36%, list=12%, signal=41%
GOCC_MITOCHONDRIAL_INNER_MEMBRANE	333	-0.55725	-1.72126	0	0.0524056	0.783	8641	tags=62%, list=26%, signal=83%
GOCC_NADH_DEHYDROGENASE_COMPLEX	45	-0.689469	-1.71462	0	0.0569353	0.815	9210	tags=87%, list=28%, signal=120%
GOBP_ATP_SYNTHESIS_COUPLED_ELECTRON_TRANSPORT	46	-0.673827	-1.70644	0	0.0649366	0.864	8641	tags=83%, list=26%, signal=112%
GOBP_REGULATION_OF_EPIDERMIS_DEVELOPMENT	58	-0.660296	-1.70601	0	0.0633445	0.868	5216	tags=47%, list=16%, signal=55%
GOMF_NADH_DEHYDROGENASE_ACTIVITY	30	-0.73516	-1.70106	0	0.0675775	0.892	8436	tags=90%, list=26%, signal=121%
GOMF_OXIDOREDUCTASE_ACTIVITY,_ACTING_ON_NAD(P)H,_QUINONE_OR_SIMILAR_COMPOUND_AS_ACCEPTOR	33	-0.723437	-1.69966	0.00152439	0.0670446	0.898	7479	tags=79%, list=23%, signal=102%
GOBP_OXIDATIVE_PHOSPHORYLATION	62	-0.649316	-1.69525	0.00147929	0.0700453	0.911	8653	tags=77%, list=26%, signal=105%
GOBP_DETECTION_OF_CHEMICAL_STIMULUS_INVOLVED_IN_SENSORY_PERCEPTION_OF_TASTE	40	-0.693288	-1.69494	0	0.0683784	0.914	5218	tags=23%, list=16%, signal=27%
GOCC_I_BAND	91	-0.614797	-1.69108	0	0.0720641	0.933	7977	tags=60%, list=24%, signal=80%
GOBP_REGULATION_OF_WATER_LOSS_VIA_SKIN	19	-0.802766	-1.68901	0.00312012	0.0729507	0.939	1917	tags=47%, list=6%, signal=50%
GOBP_EPIDERMAL_CELL_DIFFERENTIATION	139	-0.586293	-1.68768	0	0.0729095	0.942	6172	tags=43%, list=19%, signal=53%
GOCC_RESPIRATORY_CHAIN_COMPLEX_I	45	-0.689469	-1.68555	0	0.0741343	0.951	9210	tags=87%, list=28%, signal=120%
GOMF_NADH_DEHYDROGENASE_(QUINONE)_ACTIVITY	29	-0.734855	-1.68383	0.00151286	0.0749481	0.962	8436	tags=90%, list=26%, signal=120%
GOCC_INTERMEDIATE_FILAMENT_CYTOSKELETON	180	-0.571118	-1.68318	0	0.0740269	0.963	4085	tags=28%, list=12%, signal=32%
GOMF_NADH_DEHYDROGENASE_(UBIQUINONE)_ACTIVITY	29	-0.734855	-1.67661	0.00470219	0.081011	0.973	8436	tags=90%, list=26%, signal=120%
GOCC_ORGANELLE_INNER_MEMBRANE	373	-0.535968	-1.67616	0	0.0798992	0.976	8769	tags=61%, list=27%, signal=82%
GOBP_HYDROGEN_ION_TRANSMEMBRANE_TRANSPORT	107	-0.595835	-1.67608	0	0.0781741	0.976	7658	tags=61%, list=23%, signal=79%
GOCC_CYTOCHROME_COMPLEX	27	-0.73427	-1.66741	0	0.088282	0.99	6376	tags=78%, list=19%, signal=96%
GOBP_CELLULAR_RESPIRATION	118	-0.583418	-1.66722	0	0.0866364	0.991	8686	tags=69%, list=26%, signal=93%
GOBP_REGULATION_OF_EPIDERMAL_CELL_DIFFERENTIATION	41	-0.677977	-1.66155	0	0.0944534	0.993	4507	tags=49%, list=14%, signal=56%
GOBP_EPIDERMIS_DEVELOPMENT	221	-0.548681	-1.65907	0	0.0966264	0.994	5368	tags=38%, list=16%, signal=46%
GOBP_MITOCHONDRIAL_ATP_SYNTHESIS_COUPLED_ELECTRON_TRANSPORT	41	-0.680292	-1.65263	0.00147275	0.106043	0.997	8641	tags=83%, list=26%, signal=112%
GOBP_INTERMEDIATE_FILAMENT-BASED_PROCESS	40	-0.668628	-1.64535	0.00147275	0.117792	0.999	4085	tags=43%, list=12%, signal=48%
GOMF_TASTE_RECEPTOR_ACTIVITY	32	-0.697713	-1.64433	0.0015674	0.117705	1	1526	tags=9%, list=5%, signal=10%
GOBP_SKIN_DEVELOPMENT	194	-0.55278	-1.64364	0	0.116853	1	4679	tags=36%, list=14%, signal=42%
GOCC_Z_DISC	80	-0.604292	-1.64148	0.00139665	0.118732	1	7977	tags=60%, list=24%, signal=79%
GOCC_PROTON-TRANSPORTING_TWO-SECTOR_ATPASE_COMPLEX	57	-0.634338	-1.63414	0	0.131626	1	7246	tags=65%, list=22%, signal=83%
GOCC_DESMOSOME	18	-0.768832	-1.6311	0.00485437	0.135924	1	5387	tags=61%, list=16%, signal=73%
GOBP_KERATINOCYTE_DIFFERENTIATION	91	-0.592084	-1.62285	0	0.152459	1	6390	tags=41%, list=19%, signal=50%
KEGG_STEROID_BIOSYNTHESIS	19	-0.763074	-1.62041	0.00653595	0.15546	1	5787	tags=79%, list=18%, signal=96%
KEGG_TIGHT_JUNCTION	129	-0.561488	-1.6178	0	0.158973	1	4877	tags=40%, list=15%, signal=46%
GOBP_NEPHRON_TUBULE_FORMATION	20	-0.754818	-1.61694	0.00325203	0.158075	1	3044	tags=55%, list=9%, signal=61%
GOMF_HYDROGEN_ION_TRANSMEMBRANE_TRANSPORTER_ACTIVITY	108	-0.573725	-1.60861	0.0013369	0.177779	1	7658	tags=62%, list=23%, signal=81%
GOBP_SARCOMERE_ORGANIZATION	30	-0.691311	-1.59394	0.00303951	0.218995	1	6331	tags=60%, list=19%, signal=74%
GOBP_INTERMEDIATE_FILAMENT_CYTOSKELETON_ORGANIZATION	35	-0.673114	-1.58947	0.00149254	0.229878	1	4679	tags=49%, list=14%, signal=57%
GOCC_APICAL_PART_OF_CELL	303	-0.513114	-1.58336	0	0.24681	1	3815	tags=33%, list=12%, signal=37%

## Sheet: S10
Table S10. The small RNA sequencing profiles of rat urethral tissues generated in this study.
sample_name	tissue	No. of reads
normal_2A	normal urethra	33371353
normal_3A	normal urethra	33140873
injured_3A	injured urethra	33092494
injured_4A	injured urethra	33226731

[truncated: 10 more sheets: S11, S12, S13, S14, S15, S16, S17, S18, S19, S20]
